# Supplementary material for: RPflex: A Coarse-Grained Network Model for RNA Pocket Flexibility Study
Source: MDPI journal article supplement (doi:10.3390/ijms24065497), 2023-03-13
Supplement: s1 [file s1]

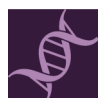

## Supplementary Information

### RPflex: A coarse-grained network model for RNA pocket flexibility study

Chen Zhuo, Chengwei Zeng, Rui Yang, Haoquan Liu, and Yunjie Zhao\*

Institute of Biophysics and Department of Physics, Central China Normal University, Wuhan, 430079, China

\* Correspondence: yjzhaowh@mail.ccnu.edu.cn

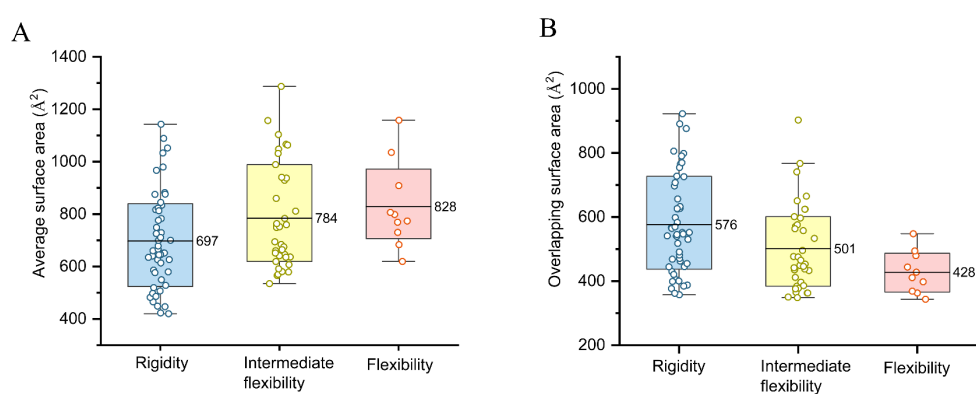

**Figure S1.** The distribution of average surface area (A) and overlapping surface area (B) of pocket groups in the medium. The mean values are colored black.

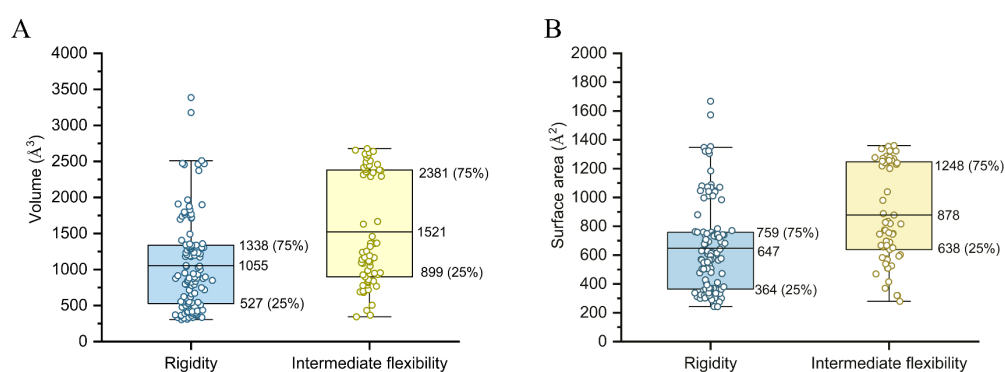

**Figure S2.** The topological information distribution of volume (A) and surface area (B) for ligand-binding pockets in rigidity and intermediate flexibility. The mean values, ranges of the box, and percentages are marked beside each box.

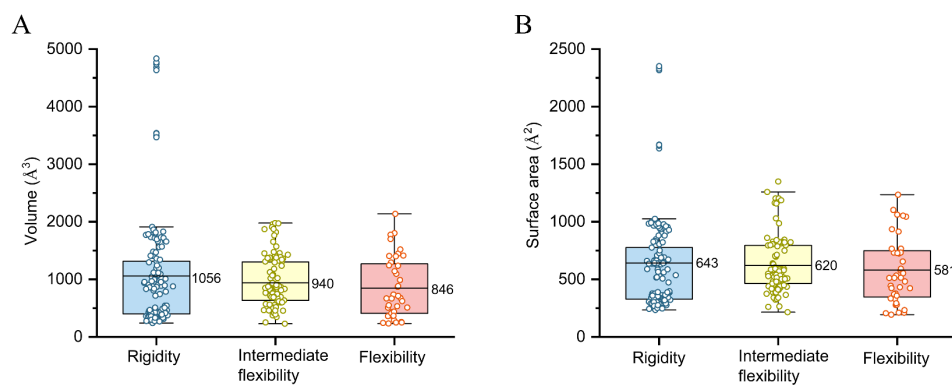

**Figure S3.** The topological information distribution of volume (A) and surface area (B) for protein-binding pockets in rigidity, intermediate flexibility, and flexibility. The mean values are colored black.

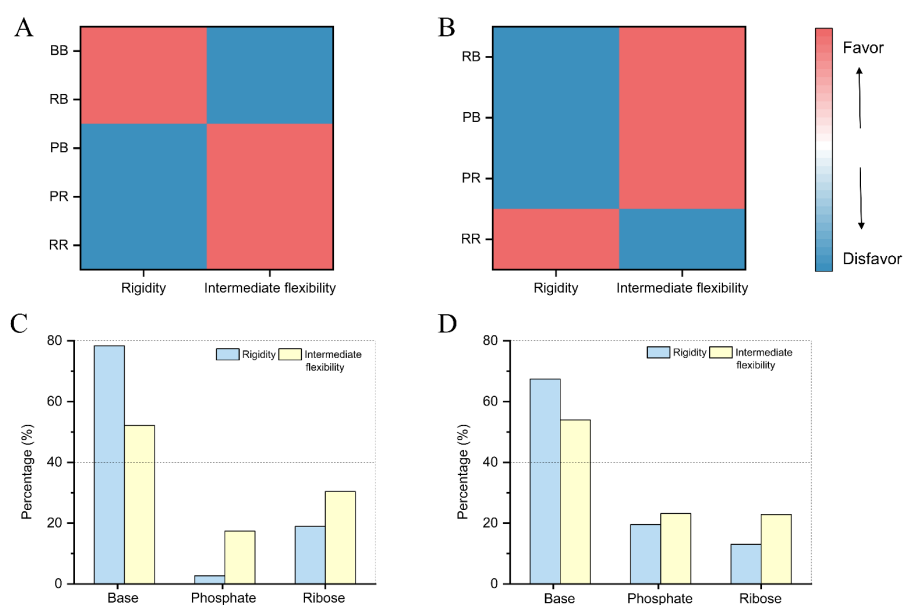

**Figure S4.** The distribution of hydrogen bonds (A) and vdW contacts (B) of nucleotides forming ligand-binding pockets. The hydrogen bonds (C) and vdW contacts (D) distribution of ligands with pockets. There are five pairs of interactions: base-base (BB), ribose-base (RB), phosphate-base (PB), phosphate-ribose (PR), and ribose-ribose(RR).

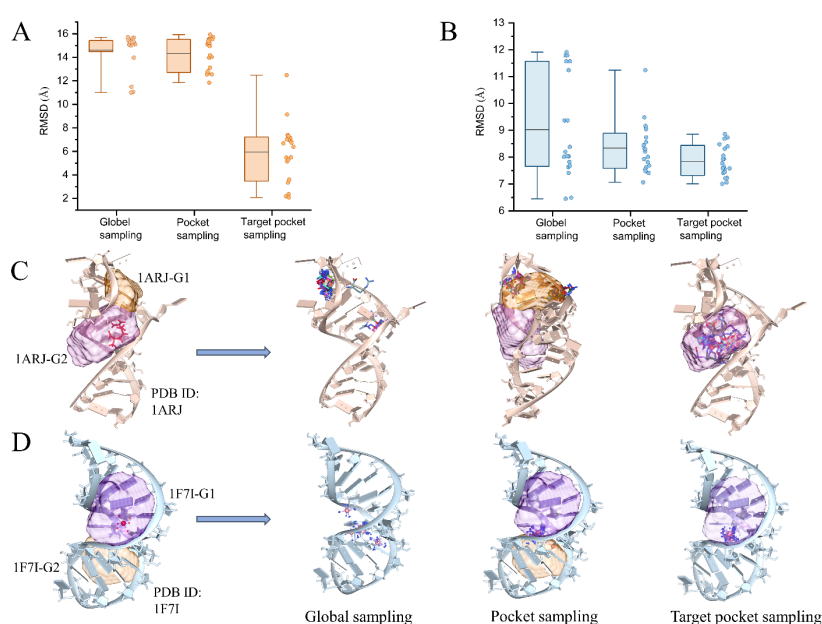

**Figure S5.** (A) The RMSD values for sampling in the RNA-ligand structure (PDB ID: 1ARJ). (B) The RMSD values for sampling in the RNA-ligand structure (PDB ID: 1F7I). (C, D) The structural views for three sampling types in RNA-ligand structures using the RLDOCK program.

**Table S1.** The distribution of hydrogen bonds and Van der Waals contacts of nucleotides forming ligand-binding pockets.

| Pair <sup>1</sup> | Hydrogen bonds |                          | Van der Waals contacts |                          |
|-------------------|----------------|--------------------------|------------------------|--------------------------|
|                   | Rigidity       | Intermediate flexibility | Rigidity               | Intermediate flexibility |
| BB                | 968 (68.0%)    | 539 (42.2%)              | 0                      | 0                        |
| RB                | 72 (5.1%)      | 22 (1.7%)                | 5 (6.3%)               | 2 (9.5%)                 |
| PB                | 11 (0.8%)      | 13 (1.0%)                | 0                      | 3 (14.3%)                |
| PR                | 22 (1.5%)      | 36 (2.8%)                | 0                      | 2 (9.5%)                 |
| RR                | 350 (24.6%)    | 668 (52.3%)              | 74 (93.7%)             | 14 (66.7%)               |
| Total             | 1423           | 1278                     | 79                     | 21                       |

<sup>1</sup> There are five interacting pairs of chemical compositions in ligand-binding pockets: base-base (BB), ribose-base (RB), phosphate-base (PB), phosphate-ribose (PR), and ribose-ribose (RR).

**Table S2.** The distribution of hydrogen bonds and Van der Waals contacts between ligands and pockets.

| Type <sup>1</sup> | Hydrogen bonds |                          | Van der Waals contacts |                          |
|-------------------|----------------|--------------------------|------------------------|--------------------------|
|                   | Rigidity       | Intermediate flexibility | Rigidity               | Intermediate flexibility |
| Base              | 569 (67.4%)    | 170 (54.0%)              | 58 (78.4%)             | 12 (52.2%)               |
| Phosphate         | 165 (19.5%)    | 73 (23.2%)               | 2 (2.7%)               | 4 (17.4%)                |
| Ribose            | 110 (13.1%)    | 72 (22.8%)               | 14 (18.9%)             | 7 (30.4%)                |
| Total             | 844            | 315                      | 74                     | 23                       |

<sup>1</sup> Three chemical groups interact with ligands: base, phosphate, and ribose.

**Table S3.** The distribution of hydrogen bonds and Van der Waals contacts of nucleotides forming protein-binding pockets.

| Pair <sup>1</sup> | Hydrogen bonds |                          |             | Van der Waals contacts |                          |             |
|-------------------|----------------|--------------------------|-------------|------------------------|--------------------------|-------------|
|                   | Rigidity       | Intermediate flexibility | Flexibility | Rigidity               | Intermediate flexibility | Flexibility |
| BB                | 1283 (58.5%)   | 885 (47.5%)              | 181 (43.7%) | 2 (3.7%)               | 27 (45.8%)               | 0           |
| RB                | 173 (7.9%)     | 94 (5.0%)                | 41 (9.9%)   | 6 (11.1%)              | 4 (6.8%)                 | 0           |
| PB                | 39 (1.8%)      | 5 (0.3%)                 | 8 (1.9%)    | 3 (5.6%)               | 0                        | 0           |
| PR                | 124 (5.7%)     | 59 (3.2%)                | 28 (6.7%)   | 11 (20.4%)             | 10 (16.9%)               | 0           |
| RR                | 573 (26.1%)    | 820 (44.0%)              | 157 (37.8%) | 32 (59.2%)             | 18 (30.5%)               | 8 (100%)    |
| Total             | 2192           | 1863                     | 415         | 54                     | 59                       | 8           |

<sup>1</sup> There are five interacting pairs of chemical compositions in protein-binding pockets: base-base (BB), ribose-base (RB), phosphate-base (PB), phosphate-ribose (PR), and ribose-ribose (RR).

**Table S4.** The distribution of hydrogen bonds and Van der Waals contacts between proteins and pockets.

| Type <sup>1</sup>          | Hydrogen bonds |                          |             | Van der Waals contacts |                          |             |
|----------------------------|----------------|--------------------------|-------------|------------------------|--------------------------|-------------|
|                            | Rigidity       | Intermediate flexibility | Flexibility | Rigidity               | Intermediate flexibility | Flexibility |
| (Charged) <sup>2</sup>     |                |                          |             |                        |                          |             |
| Base                       | 401 (30.0%)    | 203 (21.1%)              | 92 (21.3%)  | 34 (45.3%)             | 6 (10.5%)                | 0           |
| Phosphate                  | 519 (38.8%)    | 397 (41.3%)              | 113 (26.2%) | 15 (20.0%)             | 6 (10.5%)                | 1 (7.1%)    |
| Ribose                     | 149 (11.1%)    | 139 (14.5%)              | 48 (11.1%)  | 11 (14.7%)             | 27 (47.4%)               | 5 (35.7%)   |
| (Polar) <sup>3</sup>       |                |                          |             |                        |                          |             |
| Base                       | 85 (6.4%)      | 81 (8.4%)                | 71 (16.5%)  | 6 (8.0%)               | 9 (15.8%)                | 0           |
| Phosphate                  | 64 (4.8%)      | 50 (5.2%)                | 33 (7.7%)   | 1 (1.3%)               | 1 (1.8%)                 | 0           |
| Ribose                     | 10 (0.7%)      | 42 (4.4%)                | 25 (5.8%)   | 0                      | 4 (7.0%)                 | 1 (7.1%)    |
| (Hydrophobic) <sup>4</sup> |                |                          |             |                        |                          |             |
| Base                       | 57 (4.3%)      | 8 (0.8%)                 | 29 (6.7%)   | 1 (1.3%)               | 0                        | 1 (7.1%)    |
| Phosphate                  | 21 (1.6%)      | 22 (2.3%)                | 7 (1.6%)    | 0                      | 3 (5.3%)                 | 1 (7.1%)    |
| Ribose                     | 31 (2.3%)      | 19 (2.0%)                | 13 (3.0%)   | 7 (9.3%)               | 1 (1.8%)                 | 5 (35.7%)   |
| Total                      | 1337           | 961                      | 431         | 75                     | 57                       | 14          |

<sup>1</sup> There are three chemical groups of pockets: base, phosphate, and ribose; <sup>2,3,4</sup> Twenty amino acid chemical groups of proteins are classified into three categories: charged, polar, and hydrophobic.

**Table S5.** The information of pocket groups for the tested RNAs.

| PDB ID | Pocket group | Flexibility Score (Q) | Class                    | Average volume (Å <sup>3</sup> ) | Average surface area (Å <sup>2</sup> ) | Target pocket |
|--------|--------------|-----------------------|--------------------------|----------------------------------|----------------------------------------|---------------|
| 1ARJ   | 1ARJ-G1      | 0.46                  | Intermediate flexibility | 327                              | 281                                    | ×             |

|      |         |      |                          |     |     |   |
|------|---------|------|--------------------------|-----|-----|---|
|      | 1ARJ-G2 | 0.47 | Intermediate flexibility | 993 | 666 | √ |
| 1F7I | 1F7I-G1 | 0.26 | Rigidity                 | 530 | 376 | √ |
|      | 1F7I-G2 | 0.28 | Rigidity                 | 312 | 259 | × |

**Table S6.** The atomic composition of RNA chemical groups.

| Chemical group | Atomic composition                                                               |
|----------------|----------------------------------------------------------------------------------|
| Phosphate      | P , OP1, OP2                                                                     |
| Ribose         | C1', C2', C3', C4', C5', H1', H2', H3', H4', H5', H5'', O2', O3', O4', O5', HO2' |
| Adenine        | C2 , C4, C5, C6, C8, H2, H8, H61, H62, N1, N3, N6, N7, N9                        |
| Guanine        | C2, C4, C5, C6, C8, H1, H8, H21, H22, O6, N1, N2, N3, N7, N9                     |
| Cytosine       | C2, C4, C5, C6, H5, H6, H41, H42, O2, N1, N3, N4                                 |
| Uracil         | C2, C4, C5, C6, H3, H5, H6, O2, O4, N1, N3                                       |

**Table S7.** The atomic composition of 20 amino acid chemical groups.

| Chemical group | Atomic composition                                                                                         |
|----------------|------------------------------------------------------------------------------------------------------------|
| Asp            | N, CA, C, O, CB, CG, OD1, OD2, H, HA, HB2, HB3                                                             |
| Glu            | N, CA, C, O, CB, CG, CD, OE1, OE2, H, HA, HB2, HB3, HG2, HG3                                               |
| Lys            | N, CA, C, O, CB, CG, CD, CE, NZ, H, HA, HB2, HB3, HG2, HG3, HD2, HD3, HE2, HE3, HZ1, HZ2, HZ3              |
| Arg            | N, CA, C, O, CB, CG, CD, NE, CZ, NH1, NH2, H, HA, HB2, HB3, HG2, HG3, HD2, HD3, HE, HH11, HH12, HH21, HH22 |
| His            | N, CA, C, O, CB, CG, ND1, CD2, CE1, NE2, H, HA, HB2, HB3, HD1, HD2, HE1, HE2                               |
| Cys            | N, CA, C, O, CB, SG, H, HA, HB2, HB3, HG                                                                   |
| Asn            | N, CA, C, O, CB, CG, OD1, ND2, H1, H2, HA, HB2, HB3, HD21, HD22                                            |
| Gln            | N, CA, C, O, CB, CG, CD, OE1, NE2, H, HA, HB2, HB3, HG2, HG3, HE21, HE22                                   |

---

|     |                                                                                                               |
|-----|---------------------------------------------------------------------------------------------------------------|
| Ser | N, CA, C, O, CB, OG, H1, H2, H3, HA, HB2, HB3, HG                                                             |
| Thr | N, CA, C, O, CB, OG1, CG2, H1, H2, HA, HB, HG1, HG21, HG22, HG23                                              |
| Tyr | N, CA, C, O, CB, CG, CD1, CD2, CE1, CE2, CZ, OH, H, HA, HB2, HB3,<br>HD1, HD2, HE1, HE2, HH                   |
| Ala | N, CA, C, O, CB, H, HA, HB1, HB2, HB3                                                                         |
| Phe | N, CA, C, O, CB, CG, CD1, CD2, CE1, CE2, CZ, H, HA, HB2, HB3, HD1,<br>HD2, HE1, HE2, HZ                       |
| Gly | N, CA, C, O, H, HA2, HA3                                                                                      |
| Ile | N, CA, C, O, CB, CG1, CG2, CD1, H, HA, HB, HG12, HG13, HG21, HG22,<br>HG23, HD11, HD12, HD13                  |
| Leu | N, CA, C, O, CB, CG, CD1, CD2, H, HA, HB2, HB3, HG, HD11, HD12,<br>HD13, HD21, HD22, HD23                     |
| Trp | N, CA, C, O, CB, CG, CD1, CD2, NE1, CE2, CE3, CZ2, CZ3, CH2, H, HA,<br>HB2, HB3, HD1, HE1, HE3, HZ2, HZ3, HH2 |
| Met | N, CA, C, O, CB, CG, SD, CE, H1, H2, H3, HA, HB2, HB3, HG2, HG3, HE1,<br>HE2, HE3                             |
| Pro | N, CA, C, O, CB, CG, CD, HA, HB2, HB3, HG2, HG3, HD2, HD3                                                     |
| Val | N, CA, C, O, CB, CG1, CG2, H, HA, HB, HG11, HG12, HG13, HG21, HG22,<br>HG23                                   |

---
