# Supplementary material for: RPflex: A Coarse-Grained Network Model for RNA Pocket Flexibility Study
Source: Int J Mol Sci. 2023 Mar 13;24(6):5497. doi: 10.3390/ijms24065497 (PMC10058308; doi:10.3390/ijms24065497)
Supplement: Supplementary file 1 [file ijms-24-05497-s001.zip]

Archive with 6 entries (6 files):
- Supplementary Data S1.xlsx
- Supplementary Data S2.xlsx
- Supplementary Data S3.xlsx
- Supplementary Data S4.xlsx
- Supplementary Data S5.xlsx
- Supplementary Information.pdf
