# Supplementary material for: RPflex: A Coarse-Grained Network Model for RNA Pocket Flexibility Study
Source: Int J Mol Sci. 2023 Mar 13;24(6):5497. doi: 10.3390/ijms24065497 (PMC10058308; doi:10.3390/ijms24065497)
Supplement: Supplementary file 1 [file ijms-24-05497-s001.zip › Supplementary Data S1.xlsx]

## Sheet:  RNA structure
PDB ID	RNA Type	RNA chain ID	RNA structural models	RNA nucleotides	Max pocket number on structural models
2LUN	Aptamer	A	8	28	2
2JWV	Aptamer	A	10	29	2
2NBX	IRES	A	10	108	2
2NC1	IRES	A	10	67	4
2HUA	IRES	A	11	40	3
2KD8	IRES	A	12	22	2
1P5O	IRES	A	12	77	3
1R7W	IRES	A	20	34	2
1P5M	IRES	A	22	55	3
5A18	mRNA	A	10	32	1
6XXA	mRNA	A	10	21	1
2LC8	mRNA	A	10	63	3
2KE6	mRNA	A	12	48	3
1YSV	mRNA	A	13	27	1
1MFK	mRNA	A	20	23	2
1Z2J	mRNA	A	20	45	2
2GIO	mRNA	A	20	29	2
1YLG	mRNA	A	20	31	3
2KZL	Other	A	8	55	1
2KPV	Other	A	10	34	1
2N0R	Other	A	10	26	1
2N2P	Other	A	10	23	1
2N6S	Other	A	10	36	1
5LSN	Other	A	10	29	1
2LK3	Other	A	10	24	2
2N6W	Other	A	10	68	2
2NCI	Other	A	10	28	2
6NOA	Other	A	10	56	2
7K4L	Other	A	10	36	2
2KHY	Other	A	10	38	3
2LHP	Other	A	10	37	3
2N7M	Other	A	10	92	3
5IEM	Other	A	10	57	3
2LKR	Other	A	10	111	7
2FDT	Other	A	11	36	2
17RA	Other	A	12	21	2
1A9L	Other	A	12	38	2
2JYM	Other	A	15	22	1
1AQO	Other	A	15	29	2
1QWB	Other	A	17	26	1
1K6G	Other	A	20	22	1
1K6H	Other	A	20	22	1
2L2J	Other	A	20	42	1
2N7X	Other	A	20	23	1
2ES5	Other	A	20	23	2
2M24	Other	A	20	29	2
2M57	Other	A	20	35	2
2HNS	Other	A	20	22	2
2LU0	Other	A	20	49	3
1A60	Other	A	24	44	2
1QC8	Other	A	28	25	1
1JP0	Other	A	28	21	1
2LI4	Riboswitch	A	20	32	2
5KH8	Riboswitch	A	20	47	3
1R2P	Ribozyme	A	10	34	2
2M58	Ribozyme	A	10	59	2
1B36	Ribozyme	A	10	38	3
2M5U	Ribozyme	A	15	22	1
1TJZ	Ribozyme	A	20	22	1
1E4P	Ribozyme	A	20	24	2
1HWQ	Ribozyme	A	20	30	2
2AHT	Ribozyme	A	20	27	2
2L5Z	Ribozyme	A	21	26	1
2MTK	Ribozyme	A	21	47	3
2N3Q	Ribozyme	A	21	62	3
1LDZ	Ribozyme	A	25	30	2
2GBH	rRNA	A	5	24	1
1BGZ	rRNA	A	6	23	1
1SCL	rRNA	A	6	29	1
1JUR	rRNA	A	9	22	1
1A51	rRNA	A	9	41	2
1K5I	rRNA	A	10	23	1
2JSE	rRNA	A	10	22	1
2PCV	rRNA	A	10	35	2
1MNX	rRNA	A	13	42	2
2LDT	rRNA	A	13	31	2
1MT4	rRNA	A	17	24	2
1FYO	rRNA	A	25	27	2
6HYK	snoRNA	A	10	31	1
2EUY	snoRNA	A	15	34	3
5KMZ	Telomerase RNA	A	10	31	1
1Z31	Telomerase RNA	A	10	32	2
2FEY	Telomerase RNA	A	10	43	3
2K95	Telomerase RNA	A	20	48	1
2M22	Telomerase RNA	A	20	23	1
2M8K	Telomerase RNA	A	20	48	2
2QH2	Telomerase RNA	A	20	24	2
5KQE	Telomerase RNA	A	20	36	2
2L3E	Telomerase RNA	A	20	35	3
2MHI	Telomerase RNA	A	20	53	3
2GV3	tRNA	A	20	22	2
1IKD	tRNA	A	30	22	2
2K5Z	Viral RNA	A	10	29	1
2N4L	Viral RNA	A	10	53	2
6U79	Viral RNA	A	10	37	2
6W3M	Viral RNA	A	10	41	2
2KRL	Viral RNA	A	10	102	3
2MQT	Viral RNA	A	10	68	3
2N8V	Viral RNA	A	10	70	3
6VAR	Viral RNA	A	10	61	3
7LVA	Viral RNA	A	10	103	3
7DD4	Viral RNA	A	11	36	2
1S34	Viral RNA	A	15	23	1
1E95	Viral RNA	A	15	36	2
1M5L	Viral RNA	A	15	38	2
1JTJ	Viral RNA	A	19	23	1
6VU1	Viral RNA	A	20	34	1
1ANR	Viral RNA	A	20	29	2
1N66	Viral RNA	A	20	22	2
1N8X	Viral RNA	A	20	36	2
1TXS	Viral RNA	A	20	38	2
2MXL	Viral RNA	A	20	39	2
1S9S	Viral RNA	A	20	101	10
1BVJ	Viral RNA	A	21	23	2
1OSW	Viral RNA	A	23	23	1
1JO7	Viral RNA	A	32	31	2

## Sheet: RNA-ligand structure
PDB ID	RNA Type	RNA chain ID	Ligand	RNA structural models	RNA nucleotides	Max pocket number on structural models
2KX8	7sk RNA	A	ARG	10	42	2
1FMN	Aptamer	A	FMN	5	35	1
1TOB	Aptamer	A	TOA, TOB, TOC	7	27	1
1NEM	Aptamer	A	BDG, NEB	9	23	1
5LWJ	Aptamer	A	GTP	10	34	3
6GZK	Aptamer	A	FH8	10	48	2
1Q8N	Aptamer	A	MGR	25	38	1
1BYJ	Aptamer	A	GE1, GE2, GE3	38	27	2
2KTZ	IRES	A	ISH	10	38	3
6IZP	Other	A	B2R	10	29	2
1EI2	Other	A	NMY	17	25	1
2KXM	Riboswitch	A	RIO	10	27	1
6HAG	Riboswitch	A	SAH	10	43	3
2MIY	Riboswitch	A	PRF	18	59	3
2L1V	Riboswitch	A	PRF	20	36	1
6XB7	Viral RNA	A	UYS	10	41	2
2L94	Viral RNA	A	L94	10	45	3
1LVJ	Viral RNA	A	PMZ	12	31	2
2LWK	Viral RNA	A	0EC	16	32	1

## Sheet: RNA-protein struture
PDB ID	RNA Type	RNA chain ID	RNA structural models	RNA nucleotides	Max pocket number on structural models
6MCF	7sk RNA	A	10	57	2
1ULL	Aptamer	A	7	35	2
1EXY	Aptamer	A	12	33	2
484D	Aptamer	B	22	27	1
2L3J	dsRNA	B	19	71	1
6SDW	dsRNA	B	20	34	2
2L2K	dsRNA	A	20	42	2
1EKZ	dsRNA	B	36	30	2
2N3O	IRES	B	20	23	1
1G70	mRNA	A	14	32	2
2LA5	Other	A	10	36	1
1T4L	Other	A	15	32	2
2LBS	Other	A	16	32	2
2FY1	Other	B	17	21	1
6SNJ	Other	B	18	28	2
6GBM	Other	A	20	23	1
1A4T	Other	A	20	15	1
2ESE	Other	B	20	23	2
2N82	Other	A	20	23	2
1AUD	Other	B	31	30	3
1D6K	rRNA	B	20	37	2
1BIV	Viral RNA	A	5	28	1
6MCE	Viral RNA	A	10	30	1
2KDQ	Viral RNA	B	10	29	2
1NYB	Viral RNA	B	15	24	1
