# Supplementary material for: RPflex: A Coarse-Grained Network Model for RNA Pocket Flexibility Study
Source: Int J Mol Sci. 2023 Mar 13;24(6):5497. doi: 10.3390/ijms24065497 (PMC10058308; doi:10.3390/ijms24065497)
Supplement: Supplementary file 1 [file ijms-24-05497-s001.zip › Supplementary Data S2.xlsx]

## Sheet: Rigidity pocket
Pocket group ID	Pocket ID	Volume (Å3)	Surface area (Å2)	Sphericity	Effective radius (Å)	Center of mass (Å)
1YSV-G1	m 1-1	1642	920	0.73	5.35	(-30.1, -21.0, -18.3)
	m 2-1	1681	939	0.73	5.37	(-30.9, -21.0, -17.2)
	m 3-1	1733	957	0.73	5.43	(-31.2, -21.1, -17.6)
	m 4-1	1672	948	0.72	5.29	(-31.3, -21.1, -17.0)
	m 5-1	1629	915	0.73	5.34	(-31.1, -21.1, -18.2)
	m 6-1	1774	1009	0.7	5.27	(-31.4, -21.1, -16.5)
	m 7-1	1692	942	0.73	5.39	(-31.2, -22.0, -17.6)
	m 8-1	1681	959	0.71	5.26	(-30.2, -21.1, -17.1)
	m 9-1	1656	949	0.71	5.23	(-30.2, -21.1, -17.2)
	m 10-1	1669	955	0.71	5.24	(-31.3, -21.1, -17.1)
	m 11-1	1751	964	0.73	5.45	(-31.3, -21.4, -16.6)
	m 12-1	1652	937	0.72	5.29	(-29.9, -21.2, -17.2)
	m 13-1	1649	941	0.72	5.26	(-31.3, -21.1, -18.1)
6MCE-G1	m 1-1	1778	1001	0.71	5.32	(-24.9, -27.2, -22.7)
	m 2-1	1777	968	0.73	5.51	(-25.0, -28.1, -20.3)
	m 3-1	1734	967	0.72	5.38	(-25.0, -26.0, -20.8)
	m 4-1	1670	955	0.71	5.24	(-25.0, -27.9, -23.0)
	m 5-1	1772	984	0.72	5.4	(-24.9, -28.1, -22.5)
	m 6-1	1663	933	0.73	5.34	(-25.0, -28.0, -20.5)
	m 7-1	1718	995	0.7	5.18	(-26.9, -26.0, -21.0)
	m 8-1	1784	992	0.72	5.39	(-25.0, -26.0, -20.5)
	m 9-1	1697	947	0.73	5.37	(-25.2, -26.0, -22.8)
	m 10-1	1730	978	0.71	5.3	(-25.0, -26.0, -21.9)
5KH8-G2	m 1-2	787	474	0.87	4.97	(-31.9, -30.5, -35.5)
	m 2-2	731	443	0.88	4.94	(-32.7, -29.7, -36.4)
	m 3-2	728	434	0.9	5.02	(-32.6, -29.9, -36.3)
	m 4-2	859	513	0.85	5.02	(-32.0, -29.6, -37.3)
	m 5-1	755	448	0.89	5.05	(-32.8, -30.0, -38.2)
	m 6-2	832	504	0.85	4.95	(-32.0, -29.4, -37.3)
	m 7-2	805	494	0.85	4.89	(-31.9, -29.7, -36.3)
	m 8-2	770	468	0.87	4.93	(-32.6, -30.6, -38.2)
	m 9-2	721	451	0.86	4.79	(-32.9, -30.6, -36.2)
	m 10-2	787	475	0.87	4.97	(-32.6, -29.9, -38.3)
	m 11-2	737	449	0.88	4.92	(-32.8, -29.7, -36.2)
	m 12-1	778	477	0.86	4.89	(-32.8, -29.5, -37.4)
	m 13-2	787	473	0.87	4.98	(-32.8, -30.3, -37.4)
	m 14-3	701	433	0.88	4.86	(-32.6, -30.8, -35.5)
	m 15-2	812	491	0.86	4.96	(-31.9, -29.7, -35.6)
	m 16-2	724	443	0.88	4.9	(-30.6, -29.9, -36.4)
	m 17-1	812	493	0.85	4.94	(-32.1, -31.4, -36.2)
	m 18-3	742	452	0.88	4.92	(-32.7, -31.7, -35.3)
	m 19-3	705	437	0.88	4.83	(-30.7, -30.5, -38.4)
	m 20-1	749	454	0.88	4.94	(-30.7, -30.6, -37.5)
6VU1-G1	m 1-1	2431	1412	0.62	5.16	(-11.8, -21.4, -34.6)
	m 2-1	2375	1361	0.63	5.23	(-13.9, -21.6, -32.5)
	m 3-1	2344	1361	0.63	5.16	(-13.3, -21.6, -34.4)
	m 4-1	2342	1343	0.63	5.23	(-13.2, -21.5, -34.4)
	m 5-1	2506	1434	0.62	5.24	(-12.9, -21.2, -32.5)
	m 6-1	2503	1423	0.63	5.27	(-13.4, -21.2, -33.6)
	m 7-1	2513	1446	0.62	5.21	(-11.9, -21.3, -33.6)
	m 8-1	2613	1418	0.65	5.52	(-13.9, -21.2, -32.8)
	m 9-1	2388	1361	0.63	5.26	(-13.2, -21.6, -32.5)
	m 10-1	2250	1263	0.66	5.34	(-16.6, -21.6, -36.5)
	m 11-1	2475	1406	0.63	5.28	(-13.7, -21.2, -33.4)
	m 12-1	2432	1384	0.63	5.27	(-14.2, -21.5, -34.4)
	m 13-1	2373	1324	0.65	5.37	(-16.9, -21.5, -31.5)
	m 14-1	2422	1369	0.64	5.31	(-13.2, -21.5, -34.5)
	m 15-1	2419	1368	0.64	5.3	(-14.3, -21.5, -34.5)
	m 16-1	2343	1288	0.66	5.46	(-16.8, -21.5, -34.6)
	m 17-1	2376	1348	0.64	5.29	(-13.2, -21.4, -32.5)
	m 18-1	2403	1348	0.64	5.34	(-14.2, -21.4, -32.5)
	m 19-1	2391	1340	0.64	5.35	(-15.2, -21.3, -34.7)
	m 20-1	2319	1311	0.65	5.31	(-16.5, -23.6, -32.5)
2GBH-G1	m 1-1	378	320	0.79	3.54	(-26.0, -24.4, -22.0)
	m 2-1	438	345	0.81	3.8	(-26.0, -23.5, -22.3
	m 3-1	396	333	0.78	3.56	(-26.0, -24.1, -22.1)
	m 4-1	406	341	0.78	3.57	(-25.8, -24.3, -22.2)
	m 5-1	417	337	0.8	3.7	(-26.1, -23.3, -22.3)
1S9S-G1	m 1-1	628	432	0.82	4.36	(-51.9, -35.7, -58.5)
	m 2-2	696	461	0.82	4.52	(-51.6, -39.9, -58.0)
	m 3-2	607	428	0.81	4.25	(-33.8, -35.6, -67.3)
	m 4-1	687	447	0.84	4.61	(-35.9, -33.7, -62.3)
	m 5-2	662	442	0.83	4.49	(-52.0, -33.5, -59.7)
	m 6-3	661	465	0.79	4.26	(-35.8, -31.8, -64.3)
	m 7-2	657	458	0.8	4.3	(-45.7, -35.6, -64.2)
	m 8-2	708	465	0.82	4.56	(-41.6, -35.6, -58.4)
	m 9-3	677	440	0.85	4.61	(-37.9, -35.6, -69.6)
	m 10-2	629	428	0.83	4.41	(-35.9, -39.5, -64.6)
	m 11-2	680	471	0.79	4.33	(-31.8, -41.8, -64.1)
	m 12-3	632	444	0.8	4.26	(-48.0, -35.6, -58.0)
	m 13-2	690	464	0.81	4.46	(-51.6, -37.5, -64.1)
	m 14-3	654	440	0.83	4.45	(-38.5, -34.0, -61.1)
	m 15-2	738	490	0.81	4.52	(-37.4, -35.6, -66.9)
	m 16-2	670	441	0.84	4.55	(-52.4, -33.7, -61.1)
	m 17-5	708	457	0.84	4.65	(-35.6, -37.9, -68.7)
	m 18-4	697	444	0.85	4.7	(-39.8, -39.6, -65.5)
	m 19-2	687	442	0.85	4.66	(-41.6, -39.7, -59.9)
	m 20-2	619	425	0.83	4.37	(-36.3, -33.4, -65.0)
2NC1-G4	m 4-2	547	383	0.84	4.28	(-45.4, -34.8, -43.0)
	m 5-2	491	341	0.88	4.31	(-45.2, -35.4, -42.9)
	m 8-2	511	365	0.85	4.19	(-45.3, -34.4, -42.9)
	m 9-2	648	477	0.76	4.07	(-45.0, -33.0, -41.5)
	m 10-3	503	348	0.88	4.33	(-45.2, -35.4, -42.8)
5IEM-G1	m 1-1	1485	859	0.73	5.18	(-46.5, -38.6, -26.3)
	m 2-1	1490	869	0.73	5.14	(-47.7, -38.6, -25.9)
	m 3-1	1568	907	0.72	5.18	(-46.5, -38.6, -25.3)
	m 4-1	1535	879	0.73	5.24	(-47.3, -37.7, -26.0)
	m 5-1	1520	859	0.74	5.3	(-46.7, -38.5, -26.2)
	m 6-1	1546	875	0.74	5.3	(-46.6, -38.0, -25.1)
	m 7-1	1512	867	0.73	5.23	(-47.9, -37.9, -25.1)
	m 8-1	1563	904	0.72	5.19	(-47.2, -38.6, -26.1)
	m 9-1	1464	866	0.72	5.07	(-46.8, -38.2, -25.0)
	m 10-1	1479	866	0.72	5.12	(-47.8, -38.2, -24.9)
2N6S-G1	m 1-1	2849	1593	0.61	5.36	(-19.9, -29.0, -24.9)
	m 2-1	2696	1541	0.61	5.25	(-19.7, -29.0, -24.9)
	m 3-1	2696	1567	0.6	5.16	(-19.7, -30.3, -25.1)
	m 4-1	2830	1575	0.61	5.39	(-19.9, -27.7, -23.8)
	m 5-1	2696	1529	0.61	5.29	(-19.9, -30.7, -24.9)
	m 6-1	2625	1496	0.62	5.26	(-20.8, -30.9, -25.0)
	m 7-1	2841	1608	0.6	5.3	(-19.7, -28.5, -24.9)
	m 8-1	2790	1555	0.62	5.38	(-19.7, -30.4, -25.0)
	m 9-1	2679	1513	0.62	5.31	(-19.9, -30.7, -25.0)
	m 10-1	2660	1487	0.62	5.36	(-20.0, -30.8, -25.1)
1S9S-G8	m 9-2	316	254	0.88	3.72	(-39.3, -37.6, -70.4)
	m 14-2	358	285	0.86	3.77	(-38.0, -35.7, -62.8)
	m 18-3	302	259	0.84	3.49	(-40.3, -41.7, -66.8)
5KMZ-G1	m 1-1	619	445	0.79	4.17	(-26.3, -33.4, -24.0)
	m 2-1	616	434	0.81	4.25	(-26.4, -33.4, -24.0)
	m 3-1	516	396	0.83	4.25	(-26.8, -34.0, -24.4)
	m 4-1	641	462	0.78	4.16	(-26.2, -32.5, -23.9)
	m 5-1	646	464	0.78	4.17	(-26.0, -34.7, -23.9)
	m 6-1	524	387	0.81	4.06	(-26.0, -33.8, -24.3)
	m 7-1	524	389	0.81	4.03	(-26.2, -33.9, -24.5)
	m 8-1	547	389	0.83	4.21	(-26.8, -34.1, -24.3)
	m 9-1	622	437	0.81	4.27	(-26.3, -33.4, -23.9)
	m 10-1	565	399	0.83	4.25	(-26.8, -34.0, -24.2)
7DD4-G2	m 1-2	711	493	0.78	4.33	(-42.1, -28.9, -21.3)
	m 3-2	682	488	0.77	4.19	(-42.3, -24.8, -21.3)
	m 5-2	694	497	0.76	4.18	(-42.0, -26.9, -21.7)
	m 6-2	645	452	0.8	4.28	(-42.1, -28.7, -21.5)
	m 8-2	681	485	0.77	4.21	(-41.7, -27.5, -22.0)
	m 10-2	693	484	0.78	4.29	(-42.2, -29.0, -23.5)
	m 11-2	659	477	0.77	4.14	(-41.9, -29.7, -23.7)
6MCF-G2	m 3-2	1361	806	0.74	5.06	(-43.0, -31.4, -25.7)
	m 4-2	1469	881	0.71	5	(-42.6, -30.5, -25.4)
	m 5-2	1410	827	0.74	5.11	(-42.9, -30.7, -26.0)
	m 8-2	1341	822	0.71	4.89	(-40.9, -31.6, -25.5)
1Q8N-G1	m 1-1	361	322	0.76	3.36	(-41.4, -29.1, -25.4)
	m 2-1	364	317	0.78	3.44	(-41.7, -29.5, -27.0)
	m 3-1	417	354	0.76	3.53	(-38.4, -29.3, -27.6)
	m 4-1	326	300	0.76	3.25	(-39.6, -29.5, -25.7)
	m 5-1	356	312	0.78	3.42	(-41.5, -29.4, -25.1)
	m 7-1	389	332	0.77	3.5	(-39.7, -29.1, -25.4)
	m 10-1	401	332	0.79	3.62	(-39.7, -29.3, -25.1)
	m 11-1	335	300	0.78	3.34	(-39.5, -29.4, -26.0)
	m 12-1	335	296	0.79	3.39	(-41.8, -29.2, -28.2)
	m 13-1	407	341	0.78	3.58	(-39.6, -29.3, -25.2)
	m 14-1	370	324	0.77	3.42	(-41.6, -29.1, -27.6)
	m 15-1	395	338	0.77	3.5	(-38.2, -29.3, -27.8)
	m 16-1	336	303	0.77	3.32	(-39.5, -29.2, -26.0)
	m 17-1	425	365	0.75	3.48	(-38.3, -28.5, -27.6)
	m 19-1	374	322	0.78	3.48	(-39.7, -29.4, -25.9)
	m 21-1	380	331	0.76	3.43	(-39.5, -29.2, -25.4)
	m 22-1	363	327	0.75	3.33	(-38.9, -29.2, -27.9)
	m 23-1	305	289	0.76	3.16	(-39.5, -29.4, -26.0)
	m 24-1	418	361	0.75	3.46	(-40.9, -28.2, -24.6)
	m 25-1	394	334	0.78	3.53	(-41.5, -29.2, -25.4)
2L5Z-G1	m 1-1	1160	679	0.79	5.12	(-30.7, -26.9, -27.2)
	m 2-1	1266	716	0.79	5.3	(-30.9, -24.4, -26.7)
	m 3-1	1165	707	0.76	4.94	(-30.7, -24.6, -27.5)
	m 4-1	1165	690	0.78	5.06	(-30.9, -27.4, -26.6)
	m 5-1	1202	709	0.77	5.08	(-30.9, -25.4, -26.7)
	m 6-1	1149	718	0.74	4.8	(-29.6, -25.4, -27.8)
	m 7-1	1220	712	0.77	5.14	(-30.8, -27.3, -26.7)
	m 8-1	1159	657	0.81	5.29	(-31.0, -27.2, -26.7)
	m 9-1	1245	730	0.77	5.11	(-31.0, -24.6, -26.7)
	m 10-1	1313	778	0.74	5.06	(-35.0, -27.0, -32.0)
	m 11-1	1253	738	0.76	5.09	(-30.9, -26.4, -26.5)
	m 12-1	1140	682	0.77	5.01	(-31.8, -27.0, -26.7)
	m 13-1	1023	639	0.77	4.8	(-31.8, -25.7, -26.6)
	m 14-1	1101	660	0.78	5	(-31.7, -27.1, -26.6)
	m 15-1	1070	649	0.78	4.94	(-31.2, -27.0, -27.4)
	m 16-1	1237	715	0.78	5.19	(-30.9, -26.3, -26.6)
	m 17-1	1159	697	0.77	4.99	(-30.9, -24.1, -26.6)
	m 18-1	1216	711	0.77	5.13	(-30.9, -24.5, -27.5)
	m 19-1	1257	731	0.77	5.15	(-30.8, -26.5, -26.6)
	m 20-1	1242	720	0.78	5.17	(-30.7, -24.6, -27.4)
	m 21-1	1207	687	0.8	5.27	(-30.9, -24.2, -27.5)
2KX8-G2	m 1-2	849	610	0.71	4.71	(-25.9, -22.5, -45.5)
	m 2-2	942	621	0.75	4.55	(-23.5, -22.4, -45.3)
	m 3-2	915	614	0.74	4.47	(-23.8, -22.8, -45.7)
	m 4-2	998	663	0.73	4.51	(-23.1, -21.8, -45.7)
	m 5-2	877	608	0.73	4.33	(-24.3, -22.9, -45.6)
	m 6-2	935	630	0.73	4.45	(-23.5, -22.7, -47.8)
	m 7-2	1043	690	0.72	4.53	(-22.3, -22.8, -47.5)
	m 8-2	1047	700	0.71	4.49	(-21.9, -22.1, -47.6)
	m 9-2	952	641	0.73	4.45	(-23.4, -22.9, -47.7)
	m 10-2	879	628	0.71	4.19	(-26.2, -22.8, -45.4)
5LSN-G1	m 1-1	2220	1286	0.64	5.18	(-24.7, -25.1, -25.3)
	m 2-1	2628	1401	0.66	5.62	(-24.7, -25.1, -25.2)
	m 3-1	2450	1398	0.63	5.26	(-23.8, -25.0, -24.3)
	m 4-1	2131	1310	0.61	4.88	(-25.3, -25.9, -24.6)
	m 5-1	2277	1338	0.63	5.11	(-25.3, -25.0, -24.7)
	m 6-1	2384	1326	0.65	5.39	(-24.8, -24.9, -24.6)
	m 7-1	2363	1330	0.64	5.33	(-24.3, -25.1, -25.2)
	m 8-1	2392	1341	0.64	5.35	(-24.2, -25.1, -24.9)
	m 9-1	2574	1401	0.65	5.51	(-24.7, -25.0, -24.1)
	m 10-1	2410	1349	0.64	5.36	(-25.2, -25.0, -24.8)
1K5I-G1	m 1-1	1426	860	0.71	4.97	(-18.8, -20.2, -28.3)
	m 2-1	1334	806	0.73	4.96	(-18.7, -20.6, -29.3)
	m 3-1	1574	932	0.7	5.06	(-20.2, -20.7, -27.7)
	m 4-1	1334	814	0.72	4.95	(-20.8, -21.0, -26.9)
	m 5-1	1520	866	0.74	5.26	(-19.2, -20.6, -29.2)
	m 6-1	1378	836	0.72	4.94	(-18.7, -20.5, -26.6)
	m 7-1	1539	874	0.74	5.28	(-18.9, -21.0, -27.9)
	m 8-1	1378	836	0.72	4.94	(-18.7, -20.5, -26.6)
	m 9-1	1271	765	0.74	4.98	(-18.9, -20.8, -28.0)
	m 10-1	1469	857	0.71	5.04	(-21.5, -20.4, -25.4)
2L2J-G1	m 1-1	3728	2038	0.57	5.49	(-14.1, -20.4, -36.7)
	m 2-1	3690	2010	0.57	5.51	(-13.9, -21.2, -36.6)
	m 3-1	3542	1975	0.57	5.38	(-15.0, -21.3, -34.6)
	m 4-1	3469	1934	0.57	5.38	(-14.6, -22.0, -34.7)
	m 5-1	3536	1974	0.57	5.37	(-13.4, -21.1, -37.7)
	m 6-1	3631	2008	0.57	5.42	(-13.5, -21.3, -37.8)
	m 7-1	3451	1883	0.59	5.5	(-15.9, -21.7, -36.8)
	m 8-1	3668	1995	0.58	5.51	(-13.1, -20.6, -38.5)
	m 9-1	3387	1898	0.57	5.35	(-14.4, -22.0, -34.8)
	m 10-1	3582	2009	0.56	5.35	(-13.1, -20.0, -35.9)
	m 11-1	3562	1991	0.57	5.37	(-14.0, -19.9, -34.7)
	m 12-1	3552	1917	0.59	5.56	(-15.3, -21.1, -33.7)
	m 13-1	3628	2001	0.57	5.44	(-14.2, -23.2, -34.7)
	m 14-1	3511	1948	0.57	5.41	(-14.0, -20.2, -35.6)
	m 15-1	3578	1997	0.57	5.37	(-14.1, -20.2, -34.6)
	m 16-1	3307	1892	0.57	5.24	(-15.4, -20.9, -36.6)
	m 17-1	3387	1898	0.57	5.35	(-14.4, -22.0, -34.8)
	m 18-1	3399	1884	0.58	5.41	(-16.4, -21.8, -33.3)
	m 19-1	3589	1998	0.57	5.39	(-13.3, -20.5, -35.6)
	m 20-1	3564	1976	0.57	5.41	(-13.7, -19.3, -35.6)
2KX8-G1	m 1-1	1427	836	0.75	5.28	(-23.4, -21.7, -42.2)
	m 2-1	1493	853	0.74	5.25	(-21.8, -21.8, -42.7)
	m 3-1	1345	811	0.73	4.97	(-21.2, -21.9, -42.4)
	m 4-1	1757	943	0.75	5.58	(-20.4, -21.5, -42.4)
	m 5-1	1637	913	0.74	5.38	(-21.7, -21.7, -42.5)
	m 6-1	1627	891	0.75	5.48	(-21.1, -21.5, -44.4)
	m 7-1	1594	909	0.73	5.26	(-21.2, -21.4, -44.3)
	m 8-1	1754	960	0.73	5.48	(-21.1, -21.3, -44.2)
	m 9-1	1529	857	0.75	5.35	(-21.1, -22.1, -44.2)
	m 10-1	1419	849	0.72	5.01	(-23.6, -21.4, -42.8)
2FY1-G1	m 1-1	907	636	0.71	4.27	(-27.8, -27.0, -19.5)
	m 2-1	939	660	0.7	4.26	(-28.1, -28.9, -16.8)
	m 3-1	987	692	0.69	4.27	(-28.1, -27.1, -17.9)
	m 4-1	889	644	0.69	4.14	(-28.8, -28.8, -17.5)
	m 5-1	966	664	0.71	4.36	(-28.2, -29.9, -17.1)
	m 6-1	952	645	0.73	4.42	(-28.1, -28.5, -18.0)
	m 7-1	954	650	0.72	4.4	(-29.2, -28.4, -18.4)
	m 8-1	979	672	0.71	4.36	(-27.8, -27.2, -17.6)
	m 9-1	951	671	0.7	4.25	(-28.0, -29.9, -16.7)
	m 10-1	1004	676	0.72	4.45	(-28.2, -27.3, -17.8)
	m 11-1	893	627	0.71	4.27	(-27.9, -26.8, -17.3)
	m 12-1	900	636	0.71	4.24	(-29.0, -28.9, -17.4)
	m 13-1	1014	691	0.71	4.4	(-28.1, -29.3, -17.7)
	m 14-1	1009	672	0.72	4.5	(-27.7, -29.6, -17.8)
	m 15-1	1085	708	0.72	4.6	(-27.9, -28.6, -17.8)
	m 16-1	861	636	0.69	4.06	(-29.0, -28.9, -17.4)
	m 17-1	962	645	0.73	4.47	(-28.1, -28.8, -18.6)
1A4T-G1	m 1-1	339	280	0.84	3.62	(-29.4, -22.8, -21.0)
	m 2-1	404	349	0.76	3.47	(-26.9, -21.9, -18.4)
	m 3-1	436	376	0.74	3.47	(-26.5, -22.6, -17.9)
	m 4-1	343	300	0.79	3.42	(-27.9, -22.7, -21.1)
	m 5-1	434	358	0.77	3.64	(-26.1, -22.7, -19.8)
	m 6-1	417	352	0.76	3.54	(-27.9, -21.8, -20.6)
	m 7-1	446	378	0.75	3.54	(-28.0, -21.8, -19.0)
	m 8-1	413	343	0.78	3.61	(-27.1, -21.7, -18.5)
	m 9-1	424	341	0.8	3.72	(-26.9, -22.6, -18.6)
	m 10-1	449	377	0.75	3.57	(-26.2, -21.9, -22.0)
	m 11-1	398	331	0.79	3.6	(-27.8, -22.7, -20.3)
	m 12-1	402	347	0.76	3.48	(-27.0, -21.9, -21.3)
	m 13-1	406	350	0.76	3.48	(-26.9, -22.0, -18.6)
	m 14-1	431	362	0.76	3.56	(-26.9, -21.8, -18.4)
	m 15-1	410	358	0.74	3.43	(-26.4, -22.5, -18.5)
	m 16-1	464	386	0.75	3.6	(-26.2, -21.8, -18.0)
	m 17-1	452	364	0.78	3.72	(-27.2, -21.7, -20.9)
	m 18-1	376	322	0.78	3.5	(-27.0, -22.7, -19.1)
	m 19-1	371	329	0.76	3.38	(-27.3, -21.9, -20.5)
	m 20-1	390	315	0.82	3.71	(-27.7, -22.6, -20.4)
2L1V-G1	m 1-1	1320	713	0.82	5.55	(-24.5, -27.6, -27.7)
	m 2-1	978	579	0.82	5.06	(-24.8, -29.2, -28.6)
	m 3-1	1035	602	0.82	5.15	(-24.8, -28.8, -25.5)
	m 4-1	883	541	0.82	4.89	(-25.8, -29.8, -27.0)
	m 5-1	1191	666	0.82	5.36	(-24.0, -26.8, -27.7)
	m 6-1	917	521	0.88	5.28	(-25.8, -29.0, -28.4)
	m 7-1	1161	658	0.81	5.29	(-25.3, -27.5, -27.4)
	m 8-1	1259	691	0.82	5.46	(-25.9, -27.9, -28.6)
	m 9-1	1111	629	0.82	5.3	(-25.4, -27.5, -28.2)
	m 10-1	1059	615	0.82	5.16	(-24.8, -28.4, -25.6)
	m 11-1	1255	698	0.81	5.39	(-24.5, -26.6, -28.3)
	m 12-1	1007	580	0.84	5.2	(-24.6, -29.7, -27.7)
	m 13-1	1042	617	0.81	5.06	(-23.6, -28.6, -28.6)
	m 14-1	1220	683	0.81	5.36	(-24.7, -26.8, -25.4)
	m 15-1	1037	607	0.82	5.12	(-24.0, -29.3, -28.7)
	m 16-1	1020	593	0.83	5.16	(-24.9, -29.7, -27.8)
	m 17-1	1050	609	0.82	5.17	(-24.5, -29.3, -28.7)
	m 18-1	1202	665	0.82	5.42	(-24.5, -28.5, -27.9)
	m 19-1	1280	725	0.79	5.29	(-24.5, -27.4, -28.0)
	m 20-1	1175	705	0.76	5	(-24.7, -26.9, -28.4)
2K95-G1	m 1-1	793	601	0.69	3.95	(-28.0, -38.2, -24.6)
	m 2-1	1044	733	0.68	4.27	(-28.2, -37.9, -22.6)
	m 3-1	937	638	0.73	4.4	(-25.8, -40.5, -23.1)
	m 4-1	901	640	0.7	4.22	(-25.9, -39.7, -26.3)
	m 5-1	839	602	0.71	4.18	(-25.8, -39.4, -24.2)
	m 6-1	849	634	0.68	4.01	(-25.3, -39.2, -24.2)
	m 7-1	886	655	0.68	4.05	(-27.8, -39.0, -23.8)
	m 8-1	960	709	0.66	4.06	(-26.2, -38.2, -25.0)
	m 9-1	934	682	0.68	4.11	(-28.0, -38.8, -22.6)
	m 10-1	916	683	0.67	4.02	(-27.9, -37.8, -23.2)
	m 11-1	791	599	0.69	3.96	(-26.9, -38.4, -24.9)
	m 12-1	1036	728	0.68	4.27	(-25.9, -37.7, -25.2)
	m 13-1	889	618	0.72	4.31	(-27.3, -40.0, -24.5)
	m 14-1	895	648	0.69	4.14	(-27.0, -38.6, -23.6)
	m 15-1	823	606	0.7	4.07	(-26.3, -39.0, -22.9)
	m 16-1	936	661	0.7	4.25	(-25.9, -37.7, -23.2)
	m 17-1	905	649	0.7	4.18	(-25.7, -38.6, -23.1)
	m 18-1	756	580	0.69	3.91	(-29.4, -38.1, -24.8)
	m 19-1	1083	716	0.71	4.53	(-28.3, -39.0, -24.6)
	m 20-1	850	653	0.66	3.9	(-30.9, -37.7, -24.2)
2NC1-G1	m 1-1	374	287	0.87	3.9	(-45.2, -38.7, -43.3)
	m 2-1	351	271	0.89	3.88	(-45.4, -38.4, -43.7)
	m 3-1	357	277	0.88	3.86	(-45.4, -38.7, -42.8)
	m 6-1	353	274	0.88	3.86	(-45.2, -38.6, -42.9)
	m 7-1	338	266	0.88	3.81	(-45.0, -38.0, -45.4)
	m 10-1	358	282	0.86	3.8	(-45.2, -38.3, -43.0)
1BGZ-G1	m 4-1	278	264	0.78	3.15	(-25.8, -34.4, -23.5)
	m 5-1	273	258	0.79	3.16	(-25.4, -36.4, -23.8)
	m 6-1	356	324	0.75	3.29	(-26.3, -34.2, -23.3)
1S9S-G12	m 11-3	319	243	0.93	3.93	(-33.5, -41.9, -67.8)
	m 17-6	285	230	0.91	3.71	(-37.2, -38.7, -72.1)
	m 18-5	332	270	0.86	3.68	(-41.4, -40.7, -66.8)
	m 19-3	289	220	0.96	3.94	(-43.2, -41.6, -63.6)
6W3M-G2	m 1-2	551	379	0.86	4.36	(-28.1, -45.0, -27.6)
	m 2-2	651	415	0.87	4.7	(-25.2, -44.5, -25.8)
	m 3-2	791	543	0.76	4.36	(-24.1, -40.5, -26.3)
	m 5-2	671	456	0.81	4.41	(-25.6, -43.8, -24.6)
	m 6-2	630	434	0.82	4.35	(-25.4, -42.0, -28.4)
	m 8-2	674	455	0.82	4.44	(-26.1, -44.5, -24.6)
1K6G-G1	m 1-1	1332	838	0.7	4.77	(-19.7, -22.5, -21.6)
	m 2-1	1244	760	0.74	4.91	(-19.9, -22.7, -22.6)
	m 3-1	1301	819	0.7	4.76	(-22.0, -23.1, -22.8)
	m 4-1	1426	818	0.75	5.23	(-22.8, -23.5, -21.3)
	m 5-1	1424	838	0.73	5.09	(-20.0, -22.4, -21.9)
	m 6-1	1514	858	0.74	5.29	(-19.0, -22.9, -21.0)
	m 7-1	1212	770	0.71	4.72	(-20.8, -22.7, -21.8)
	m 8-1	1407	830	0.73	5.08	(-19.9, -23.4, -21.8)
	m 9-1	1396	844	0.72	4.96	(-21.9, -23.2, -21.8)
	m 10-1	1307	832	0.69	4.71	(-20.9, -22.3, -22.9)
	m 11-1	1341	837	0.7	4.81	(-20.9, -23.4, -21.8)
	m 12-1	1307	837	0.69	4.68	(-19.3, -23.6, -21.8)
	m 13-1	1489	872	0.72	5.12	(-19.2, -23.5, -20.9)
	m 14-1	1416	831	0.73	5.11	(-19.9, -23.3, -21.8)
	m 15-1	1162	737	0.72	4.73	(-21.3, -23.4, -22.0)
	m 16-1	1217	778	0.71	4.69	(-21.0, -24.1, -22.1)
	m 17-1	1483	856	0.73	5.19	(-22.1, -25.4, -22.2)
	m 18-1	1215	763	0.72	4.77	(-23.3, -26.4, -22.1)
	m 19-1	1343	789	0.75	5.11	(-19.9, -24.6, -22.8)
	m 20-1	1418	833	0.73	5.1	(-20.1, -23.6, -22.8)
2LC8-G5	m 2-2	533	374	0.85	4.27	(-42.6, -35.0, -29.9)
	m 3-2	513	361	0.86	4.25	(-44.7, -35.6, -32.0)
	m 5-3	589	412	0.82	4.29	(-44.7, -32.5, -26.6)
	m 6-2	551	385	0.84	4.29	(-46.7, -33.3, -28.5)
	m 7-3	503	357	0.86	4.22	(-44.6, -37.6, -29.8)
	m 9-3	652	445	0.82	4.39	(-48.6, -29.7, -28.5)
	m 10-3	946	626	0.74	4.53	(-48.3, -28.7, -25.7)
2LA5-G1	m 1-1	1045	635	0.78	4.94	(-24.4, -33.5, -27.3)
	m 2-1	868	529	0.83	4.92	(-24.8, -32.8, -28.6)
	m 3-1	744	507	0.78	4.4	(-25.0, -30.2, -28.0)
	m 4-1	806	516	0.81	4.68	(-24.2, -32.8, -26.4)
	m 5-1	879	536	0.83	4.91	(-24.0, -30.8, -30.4)
	m 6-1	837	519	0.83	4.84	(-22.1, -33.0, -31.3)
	m 7-1	1074	630	0.8	5.11	(-24.7, -32.3, -26.2)
	m 8-1	786	473	0.87	4.98	(-24.8, -34.0, -26.7)
	m 9-1	955	589	0.8	4.86	(-24.7, -32.8, -25.1)
	m 10-1	953	561	0.83	5.09	(-24.1, -37.8, -27.4)
2LK3-G2	m 3-1	228	225	0.8	3.04	(-24.3, -28.2, -29.8)
	m 4-1	274	246	0.83	3.34	(-23.9, -26.2, -29.6)
	m 5-1	242	219	0.86	3.31	(-24.0, -25.9, -32.4)
	m 6-1	246	228	0.83	3.23	(-24.3, -26.2, -29.7)
6HYK-G1	m 1-1	347	278	0.86	3.73	(-36.3, -32.0, -28.6)
	m 2-1	391	304	0.85	3.85	(-38.5, -32.3, -28.6)
	m 3-1	381	296	0.86	3.86	(-38.5, -32.3, -28.7)
	m 4-1	248	213	0.89	3.48	(-37.7, -32.9, -28.9)
	m 5-1	325	263	0.87	3.7	(-38.3, -33.0, -28.8)
	m 6-1	346	269	0.88	3.85	(-36.4, -32.3, -28.2)
	m 7-1	305	238	0.92	3.84	(-39.2, -32.9, -28.6)
	m 8-1	316	257	0.87	3.68	(-36.3, -32.9, -29.1)
	m 9-1	304	255	0.86	3.57	(-38.2, -32.8, -28.8)
	m 10-1	431	333	0.83	3.88	(-35.8, -31.6, -27.9)
1N66-G2	m 3-1	256	229	0.85	3.35	(-58.4, -86.9, -65.4)
	m 14-1	261	220	0.89	3.54	(-58.4, -87.0, -65.1)
	m 15-1	357	281	0.86	3.8	(-58.0, -86.2, -64.2)
5KQE-G1	m 1-1	1292	790	0.73	4.91	(-33.1, -24.4, -30.1)
	m 2-1	1234	774	0.72	4.78	(-31.1, -25.1, -30.2)
	m 3-1	1290	791	0.72	4.89	(-33.3, -24.3, -31.0)
	m 4-1	1071	711	0.71	4.52	(-32.7, -25.4, -31.6)
	m 5-1	1216	715	0.77	5.1	(-33.1, -24.7, -31.9)
	m 6-1	1003	680	0.71	4.42	(-34.9, -25.6, -31.9)
	m 7-1	1094	706	0.73	4.64	(-32.0, -25.4, -32.3)
	m 8-1	945	632	0.74	4.48	(-32.7, -25.3, -32.3)
	m 9-1	1300	801	0.72	4.86	(-33.0, -24.3, -29.2)
	m 10-1	1268	841	0.67	4.52	(-31.0, -24.0, -29.4)
	m 11-1	1236	769	0.72	4.82	(-33.5, -24.4, -29.4)
	m 12-1	1067	681	0.74	4.7	(-34.7, -25.5, -31.8)
	m 13-1	1257	765	0.74	4.93	(-33.0, -24.5, -30.2)
	m 14-1	1308	760	0.76	5.16	(-32.7, -24.6, -31.8)
	m 15-1	1030	686	0.72	4.5	(-32.4, -25.5, -32.2)
	m 16-1	992	627	0.77	4.75	(-32.7, -25.8, -31.6)
	m 17-1	945	662	0.7	4.28	(-32.6, -25.2, -32.2)
	m 18-1	1168	739	0.73	4.74	(-32.9, -24.2, -29.4)
	m 19-1	976	653	0.73	4.48	(-34.0, -27.6, -31.8)
	m 20-1	1305	799	0.72	4.9	(-32.9, -24.3, -29.3)
2LK3-G1	m 1-1	459	331	0.87	4.15	(-25.1, -25.4, -29.0)
	m 2-1	488	336	0.89	4.35	(-24.9, -24.5, -29.1)
	m 3-2	489	357	0.84	4.1	(-25.3, -26.5, -28.9)
	m 4-2	556	370	0.88	4.5	(-24.3, -24.8, -28.8)
	m 5-2	403	297	0.89	4.06	(-24.7, -25.6, -32.1)
	m 6-2	546	363	0.89	4.51	(-24.3, -24.7, -28.8)
	m 7-1	404	310	0.85	3.9	(-24.7, -25.6, -32.0)
	m 8-1	371	293	0.85	3.79	(-25.4, -25.6, -30.0)
	m 9-1	488	337	0.89	4.34	(-24.9, -24.5, -29.1)
	m 10-1	484	328	0.91	4.41	(-24.9, -24.6, -29.1)
2JSE-G1	m 1-1	1032	639	0.77	4.84	(-22.8, -28.6, -26.7)
	m 2-1	1000	625	0.77	4.8	(-20.8, -27.3, -26.7)
	m 3-1	999	632	0.76	4.74	(-22.6, -29.4, -26.5)
	m 4-1	956	606	0.77	4.73	(-22.1, -29.4, -26.6)
	m 5-1	1154	692	0.77	5	(-21.1, -29.8, -26.3)
	m 6-1	984	620	0.77	4.76	(-20.7, -28.1, -26.2)
	m 7-1	1158	695	0.77	5	(-19.7, -28.7, -25.8)
	m 8-1	985	625	0.77	4.72	(-23.0, -27.1, -26.7)
	m 9-1	1078	679	0.75	4.76	(-21.0, -28.8, -26.9)
	m 10-1	1197	704	0.77	5.1	(-22.5, -27.7, -26.1)
2N4L-G1	m 1-1	5263	2743	0.53	5.75	(-35.8, -136.0, -92.0)
	m 2-1	5139	2696	0.53	5.27	(-33.7, -136.0, -91.7)
	m 3-1	5303	2766	0.53	5.75	(-33.6, -135.0, -89.6)
	m 4-1	4420	2274	0.57	5.83	(-39.0, -138.0, -95.9)
	m 5-1	5233	2668	0.55	5.88	(-36.3, -137.8, -90.5)
	m 6-1	5414	2755	0.54	5.9	(-35.9, -136.8, -89.7)
	m 7-1	5690	2811	0.55	6.07	(-35.5, -138.1, -91.7)
	m 8-1	5549	2737	0.55	6.08	(-35.8, -138.0, -90.3)
	m 9-1	4400	2246	0.58	5.88	(-38.7, -138.0, -93.9)
	m 10-1	5228	2756	0.53	5.69	(-33.9, -135.0, -92.1)
1EXY-G1	m 1-1	364	309	0.8	3.53	(-39.0, -25.0, -28.6)
	m 2-1	345	311	0.76	3.32	(-35.3, -26.9, -28.8)
	m 3-1	377	322	0.78	3.5	(-34.8, -26.2, -31.5)
	m 4-1	360	305	0.8	3.53	(-37.3, -26.9, -31.1)
	m 5-1	376	328	0.77	3.43	(-37.1, -26.4, -31.4)
	m 6-1	328	288	0.8	3.42	(-35.3, -27.2, -32.9)
	m 7-1	422	346	0.79	3.66	(-34.5, -26.7, -28.8)
	m 8-1	313	276	0.81	3.4	(-39.2, -26.8, -29.1)
	m 9-1	350	307	0.78	3.42	(-37.2, -26.8, -30.1)
	m 10-1	374	300	0.84	3.73	(-35.3, -27.4, -32.2)
	m 11-1	336	291	0.8	3.45	(-37.4, -24.8, -31.0)
	m 12-1	241	234	0.8	3.08	(-37.8, -28.1, -33.5)
2MHI-G1	m 1-1	281	255	0.81	3.3	(-32.3, -42.7, -26.1)
	m 3-1	693	563	0.67	3.69	(-28.2, -38.4, -24.0)
	m 4-1	288	260	0.81	3.32	(-32.0, -42.5, -25.2)
	m 5-1	287	254	0.83	3.38	(-31.8, -42.6, -26.4)
	m 7-1	312	252	0.88	3.7	(-31.5, -43.1, -26.7)
	m 8-1	301	259	0.84	3.48	(-30.3, -40.0, -27.5)
	m 9-1	361	287	0.85	3.76	(-31.6, -41.7, -26.5)
	m 10-1	295	256	0.84	3.45	(-31.7, -43.4, -25.4)
	m 11-1	276	241	0.85	3.42	(-32.1, -43.4, -25.5)
	m 12-1	325	258	0.88	3.77	(-31.4, -42.5, -26.0)
	m 14-1	327	270	0.85	3.62	(-31.3, -43.3, -25.1)
	m 17-1	313	279	0.8	3.36	(-31.5, -43.3, -25.0)
1TXS-G1	m 1-1	2972	1455	0.69	6.12	(-20.7, -32.9, -19.6)
	m 2-1	3449	1606	0.69	6.44	(-19.4, -34.7, -19.2)
	m 3-1	2616	1335	0.69	5.88	(-19.5, -37.3, -20.9)
	m 4-1	2650	1399	0.66	5.68	(-19.6, -33.4, -20.0)
	m 5-1	2965	1421	0.7	6.26	(-20.5, -34.6, -19.8)
	m 6-1	3092	1471	0.7	6.31	(-20.4, -32.6, -20.2)
	m 7-1	2739	1373	0.69	5.98	(-19.2, -33.5, -19.9)
	m 8-1	3057	1489	0.68	6.16	(-19.7, -33.9, -19.9)
	m 9-1	2589	1274	0.72	6.1	(-20.6, -35.7, -20.4)
	m 10-1	2629	1297	0.71	6.08	(-19.7, -37.2, -20.5)
	m 11-1	2867	1405	0.69	6.12	(-20.3, -34.8, -19.4)
	m 12-1	2798	1365	0.7	6.15	(-20.1, -35.2, -20.2)
	m 13-1	2820	1422	0.68	5.95	(-19.8, -34.7, -19.6)
	m 14-1	3138	1519	0.68	6.2	(-22.2, -33.2, -20.6)
	m 15-1	2876	1409	0.69	6.12	(-22.3, -35.6, -20.2)
	m 16-1	3366	1537	0.71	6.57	(-19.8, -34.5, -19.8)
	m 17-1	3218	1472	0.72	6.56	(-19.3, -34.5, -19.6)
	m 18-1	2771	1461	0.65	5.69	(-20.8, -32.1, -20.5)
	m 19-1	3027	1504	0.67	6.04	(-19.8, -35.0, -20.9)
	m 20-1	3218	1619	0.66	6.08	(-20.4, -31.8, -19.6)
5IEM-G3	m 1-3	483	334	0.89	4.33	(-53.1, -39.6, -29.6)
	m 3-3	431	312	0.88	4.13	(-52.7, -39.5, -29.7)
	m 5-3	553	381	0.85	4.35	(-52.2, -39.8, -28.2)
	m 8-3	371	295	0.85	3.77	(-53.0, -40.2, -29.4)
2L3E-G2	m 1-2	649	473	0.77	4.11	(-25.0, -40.4, -21.9)
	m 2-2	648	452	0.8	4.3	(-24.9, -41.7, -21.7)
	m 3-1	666	477	0.77	4.18	(-25.0, -37.9, -21.8)
	m 4-1	662	477	0.77	4.16	(-26.0, -41.9, -22.0)
	m 5-2	617	432	0.81	4.28	(-25.1, -43.3, -21.9)
	m 6-2	576	449	0.74	3.84	(-24.5, -40.2, -22.2)
	m 7-2	748	513	0.78	4.37	(-24.1, -38.2, -21.7)
	m 8-2	635	450	0.79	4.23	(-24.7, -37.9, -21.7)
	m 9-1	632	477	0.75	3.97	(-24.7, -40.7, -22.6)
	m 10-1	579	428	0.78	4.05	(-25.6, -41.1, -22.7)
	m 11-2	624	452	0.78	4.13	(-25.0, -43.2, -20.7)
	m 12-2	585	429	0.79	4.09	(-25.3, -39.5, -22.8)
	m 13-1	635	450	0.79	4.22	(-25.5, -41.8, -21.7)
	m 14-1	642	466	0.77	4.12	(-24.8, -41.5, -22.1)
	m 15-2	634	472	0.76	4.03	(-24.5, -42.3, -21.6)
	m 16-2	757	517	0.78	4.39	(-25.8, -39.2, -23.3)
	m 17-2	633	470	0.76	4.04	(-24.7, -42.4, -21.6)
	m 18-2	690	495	0.76	4.18	(-24.4, -39.0, -21.6)
	m 19-2	638	454	0.79	4.21	(-25.4, -37.4, -22.6)
	m 20-2	550	414	0.78	3.98	(-26.2, -41.6, -22.8)
1T4L-G2	m 1-2	256	215	0.9	3.56	(-34.6, -34.1, -36.2)
	m 3-2	254	208	0.93	3.65	(-34.6, -34.1, -35.9)
	m 6-2	325	255	0.89	3.81	(-34.5, -34.0, -34.8)
	m 7-2	282	220	0.94	3.83	(-32.7, -36.0, -35.1)
	m 9-2	233	203	0.9	3.44	(-34.4, -33.9, -36.7)
	m 10-2	319	255	0.88	3.75	(-33.7, -34.1, -35.5)
	m 11-2	246	206	0.92	3.57	(-34.7, -34.1, -36.1)
	m 13-2	266	225	0.89	3.54	(-34.8, -33.4, -35.4)
	m 14-2	291	231	0.92	3.76	(-34.1, -33.9, -35.7)
6GZK-G1	m 1-1	703	589	0.65	3.58	(-31.2, -27.2, -30.4)
	m 2-1	724	599	0.65	3.63	(-31.2, -27.0, -30.5)
	m 3-1	725	594	0.66	3.66	(-31.2, -27.0, -30.4
	m 4-1	936	684	0.68	4.11	(-30.4, -26.5, -29.5)
	m 5-1	786	643	0.64	3.66	(-31.5, -25.1, -30.8)
	m 6-1	798	665	0.63	3.6	(-31.7, -26.5, -30.1)
	m 7-1	940	698	0.66	4.04	(-34.6, -26.4, -29.9)
	m 8-1	765	617	0.66	3.72	(-35.0, -26.4, -33.1)
	m 9-1	814	654	0.64	3.73	(-31.1, -26.7, -30.2)
	m 10-1	653	519	0.7	3.77	(-31.7, -27.3, -31.5)
2K5Z-G1	m 1-1	1984	1111	0.69	5.35	(-30.5, -25.6, -22.6)
	m 2-1	1887	1077	0.69	5.25	(-30.4, -25.7, -22.9)
	m 3-1	1890	1150	0.64	4.93	(-26.6, -23.8, -21.8)
	m 4-1	1569	868	0.75	5.42	(-31.5, -27.7, -26.7)
	m 5-1	1386	841	0.71	4.94	(-29.5, -25.3, -25.9)
	m 6-1	1941	1077	0.7	5.4	(-30.7, -26.2, -22.7)
	m 7-1	2082	1161	0.68	5.38	(-25.7, -25.7, -22.5)
	m 8-1	2044	1067	0.73	5.75	(-30.8, -25.8, -24.4)
	m 9-1	1802	1026	0.7	5.27	(-26.0, -26.8, -24.0)
	m 10-1	1922	1040	0.72	5.54	(-28.9, -23.9, -24.4)
2KHY-G2	m 1-2	428	361	0.76	3.55	(-49.2, -28.5, -22.2)
	m 2-2	399	301	0.87	3.97	(-49.7, -29.9, -23.9)
	m 3-3	366	294	0.84	3.73	(-49.8, -28.7, -24.3)
	m 4-2	450	389	0.73	3.47	(-49.6, -27.7, -21.7)
	m 5-2	453	363	0.79	3.74	(-49.6, -28.8, -21.9)
	m 6-2	416	353	0.76	3.53	(-49.5, -29.0, -22.2)
	m 7-2	451	355	0.8	3.81	(-49.8, -28.4, -23.2)
	m 8-2	359	311	0.79	3.46	(-50.3, -31.9, -22.7)
	m 9-2	395	312	0.83	3.79	(-50.4, -29.2, -23.6)
	m 10-2	399	297	0.88	4.02	(-50.2, -29.9, -24.1)
7DD4-G1	m 1-1	1552	934	0.69	4.98	(-38.6, -29.0, -17.2)
	m 2-1	2269	1388	0.6	4.9	(-38.9, -25.4, -11.7)
	m 3-1	1487	895	0.7	4.98	(-38.1, -24.8, -17.8)
	m 4-2	2084	1278	0.62	4.89	(-37.7, -27.3, -11.1)
	m 5-1	1516	903	0.71	5.04	(-38.5, -27.1, -18.0)
	m 6-1	1516	903	0.71	5.05	(-38.4, -27.1, -17.1)
	m 7-1	2181	1346	0.6	4.86	(-38.8, -29.2, -9.0)
	m 8-1	1513	904	0.7	5.02	(-37.4, -27.2, -17.8)
	m 9-1	2122	1283	0.62	4.96	(-38.8, -27.3, -11.0)
	m 10-1	1637	949	0.71	5.17	(-38.2, -27.8, -19.3)
	m 11-1	1705	976	0.71	5.24	(-37.2, -27.9, -19.2)
1BYJ-G1	m 1-1	1179	695	0.78	5.08	(-24.9, -28.5, -22.4)
	m 2-1	1830	1089	0.66	5.04	(-20.7, -25.3, -21.8)
	m 3-2	1406	783	0.77	5.39	(-25.0, -29.4, -21.8)
	m 4-1	1877	1080	0.68	5.21	(-21.4, -22.9, -21.4)
	m 5-2	1234	693	0.8	5.34	(-25.8, -30.3, -21.8)
	m 6-1	1758	1047	0.67	5.04	(-20.5, -25.0, -21.9)
	m 7-2	1319	741	0.78	5.34	(-25.9, -30.2, -21.8)
	m 8-1	1722	1039	0.67	4.97	(-20.6, -23.1, -21.5)
	m 9-2	1354	760	0.78	5.34	(-25.1, -29.9, -21.9)
	m 10-1	1056	612	0.82	5.17	(-24.7, -28.9, -24.6)
	m 11-1	1766	1047	0.67	5.06	(-20.7, -23.1, -21.8)
	m 12-1	1713	1011	0.68	5.08	(-20.7, -25.5, -21.8)
	m 13-2	1306	740	0.78	5.29	(-26.0, -30.1, -22.8)
	m 14-2	1218	694	0.79	5.26	(-25.7, -29.8, -22.4)
	m 15-2	1358	759	0.78	5.36	(-25.1, -29.9, -21.9)
	m 16-2	1306	741	0.78	5.29	(-25.8, -30.2, -21.0)
	m 17-2	1196	676	0.81	5.31	(-25.7, -28.6, -22.5)
	m 18-1	1207	673	0.81	5.38	(-25.7, -28.8, -23.1)
	m 19-1	1798	1070	0.67	5.04	(-20.7, -25.1, -21.7)
	m 20-1	1769	1039	0.68	5.11	(-20.7, -24.0, -21.6)
	m 21-2	1325	750	0.78	5.3	(-25.1, -28.0, -21.9)
	m 22-2	1341	770	0.76	5.22	(-25.2, -28.9, -22.7
	m 23-1	1790	1073	0.66	5	(-20.6, -25.9, -20.8)
	m 24-1	1697	1011	0.68	5.03	(-20.4, -24.1, -21.6)
	m 25-2	1304	742	0.78	5.27	(-25.9, -30.2, -21.9)
	m 26-2	1339	763	0.77	5.26	(-25.1, -28.0, -20.9)
	m 27-2	1232	728	0.76	5.07	(-25.0, -29.7, -23.4)
	m 28-1	1738	1042	0.67	5	(-20.6, -25.0, -21.9)
	m 29-2	1287	733	0.78	5.27	(-25.9, -30.3, -21.9)
	m 30-1	1188	682	0.79	5.22	(-25.9, -28.0, -22.5)
	m 31-2	1338	759	0.77	5.28	(-25.0, -30.2, -20.7)
	m 32-2	1288	738	0.78	5.23	(-25.7, -30.2, -21.7)
	m 33-1	1030	578	0.85	5.34	(-25.7, -30.2, -24.4)
	m 34-1	1172	677	0.79	5.19	(-24.9, -29.8, -24.0)
	m 35-1	1909	1071	0.69	5.34	(-21.2, -24.7, -21.5)
	m 36-2	1270	744	0.76	5.12	(-25.0, -29.9, -22.7)
	m 37-2	1236	708	0.79	5.23	(-24.9, -28.5, -23.2)
	m 38-1	1182	722	0.75	4.91	(-25.0, -29.8, -22.6)
2MHI-G2	m 1-2	299	259	0.83	3.45	(-31.7, -42.8, -26.5)
	m 3-2	263	238	0.83	3.31	(-31.5, -43.2, -27.3)
	m 4-2	286	232	0.9	3.69	(-31.1, -42.8, -27.7)
	m 6-2	319	264	0.85	3.61	(-30.7, -43.6, -27.5)
	m 8-2	261	224	0.88	3.49	(-31.3, -43.7, -27.2)
	m 9-2	251	222	0.86	3.38	(-32.0, -42.8, -27.2)
	m 10-2	279	249	0.83	3.35	(-31.3, -43.1, -26.7)
	m 12-3	273	230	0.88	3.55	(-32.0, -42.5, -27.2)
	m 13-1	266	248	0.8	3.21	(-31.8, -42.2, -29.1)
	m 14-3	292	264	0.81	3.32	(-30.8, -43.4, -26.5)
	m 15-1	269	227	0.89	3.55	(-31.1, -43.5, -27.0)
	m 16-2	254	227	0.85	3.35	(-31.5, -43.4, -29.4)
	m 18-2	369	313	0.79	3.53	(-31.2, -40.7, -27.3)
	m 19-2	290	264	0.8	3.29	(-31.6, -42.1, -26.8)
	m 20-2	262	231	0.85	3.39	(-31.1, -42.6, -27.3)
2KRL-G1	m 1-1	1388	761	0.79	5.47	(-48.1, -39.7, -52.8)
	m 2-1	1332	776	0.75	5.15	(-47.9, -41.6, -52.1)
	m 3-1	1135	668	0.79	5.1	(-49.5, -41.6, -50.7)
	m 4-1	1691	940	0.73	5.39	(-47.4, -38.7, -51.3)
	m 5-1	1258	716	0.79	5.27	(-48.1, -40.2, -53.6)
	m 6-1	1570	864	0.76	5.45	(-47.7, -38.4, -52.1)
	m 7-1	1102	643	0.8	5.13	(-47.6, -40.7, -53.5)
	m 8-1	1734	906	0.77	5.74	(-47.8, -38.0, -53.4)
	m 9-1	1495	811	0.78	5.52	(-47.3, -39.4, -53.0)
	m 10-1	1344	746	0.79	5.4	(-45.0, -41.4, -53.4)
7K4L-G3	m 5-2	489	353	0.85	4.15	(-45.6, -32.6, -24.7)
	m 8-2	447	329	0.86	4.07	(-40.5, -30.4, -30.7)
	m 10-2	380	287	0.88	3.97	(-45.7, -33.7, -22.4)
1Z2J-G1	m 1-1	2480	1264	0.7	5.89	(-29.6, -34.2, -21.7)
	m 2-1	3850	2045	0.58	5.65	(-28.6, -24.3, -13.6)
	m 3-1	2470	1242	0.71	5.96	(-26.9, -34.7, -22.0)
	m 4-1	2448	1247	0.7	5.89	(-29.9, -34.0, -21.0)
	m 5-1	2396	1215	0.71	5.91	(-29.7, -34.0, -20.9)
	m 6-1	2415	1223	0.71	5.92	(-29.8, -34.8, -22.4)
	m 7-1	2397	1241	0.7	5.79	(-29.7, -34.1, -20.7)
	m 8-1	3690	2078	0.56	5.33	(-27.3, -24.4, -16.5)
	m 9-1	2362	1196	0.72	5.92	(-30.6, -33.8, -21.7)
	m 10-1	2408	1212	0.72	5.96	(-29.7, -35.5, -21.2)
	m 11-1	2441	1244	0.7	5.88	(-29.8, -35.0, -22.3)
	m 12-1	2423	1219	0.72	5.96	(-30.6, -33.8, -22.7)
	m 13-1	2479	1251	0.71	5.94	(-26.7, -34.2, -24.1)
	m 14-1	4001	2115	0.58	5.67	(-27.7, -24.8, -15.4)
	m 15-1	2505	1265	0.7	5.94	(-30.4, -36.1, -22.4)
	m 16-1	2424	1238	0.7	5.87	(-27.6, -33.8, -21.7)
	m 17-1	2429	1255	0.7	5.8	(-29.8, -35.8, -22.2)
	m 18-1	2441	1211	0.72	6.04	(-29.6, -35.6, -22.6)
	m 19-1	2372	1229	0.7	5.79	(-28.5, -33.7, -21.8)
	m 20-1	2393	1228	0.7	5.84	(-29.7, -36.1, -21.1)
1G70-G1	m 1-1	1829	961	0.75	5.71	(-21.8, -30.7, -19.6)
	m 2-1	1194	654	0.83	5.47	(-25.0, -30.5, -18.6)
	m 3-1	1912	1026	0.73	5.59	(-21.7, -29.6, -17.2)
	m 4-1	1794	961	0.74	5.6	(-22.7, -28.7, -19.7)
	m 5-2	1561	895	0.73	5.23	(-24.5, -28.4, -22.9)
	m 6-1	1480	848	0.74	5.23	(-23.1, -29.9, -22.8)
	m 7-1	1719	915	0.76	5.63	(-21.9, -29.2, -17.7)
	m 8-1	1569	880	0.74	5.34	(-21.8, -28.5, -20.0)
	m 9-1	1408	832	0.73	5.07	(-24.3, -30.2, -16.8)
	m 10-1	1200	676	0.81	5.32	(-26.5, -31.1, -21.4)
	m 11-1	1863	978	0.75	5.71	(-22.2, -28.9, -19.5)
	m 12-2	1316	727	0.8	5.43	(-25.3, -30.4, -18.6)
	m 13-1	1815	986	0.73	5.52	(-22.4, -28.2, -19.4)
	m 14-1	1657	929	0.73	5.35	(-21.3, -29.6, -20.1)
1TXS-G2	m 2-2	315	244	0.92	3.86	(-24.8, -43.8, -25.9)
	m 6-2	331	264	0.87	3.75	(-24.7, -44.5, -24.8)
	m 9-2	426	311	0.88	4.1	(-23.6, -43.3, -24.6)
	m 18-2	452	340	0.84	3.98	(-23.9, -43.9, -24.7)
	m 20-2	380	288	0.88	3.95	(-22.7, -43.6, -25.3)
2MHI-G4	m 5-2	345	308	0.77	3.36	(-29.7, -41.4, -27.2)
	m 6-1	315	282	0.79	3.35	(-30.1, -41.9, -27.1)
	m 11-2	368	335	0.74	3.29	(-29.1, -41.4, -27.3)
	m 12-2	382	328	0.77	3.49	(-29.8, -41.1, -28.1)
	m 16-1	277	261	0.78	3.17	(-29.7, -41.4, -30.4)
	m 17-2	313	300	0.74	3.13	(-29.6, -41.7, -28.2)
	m 18-1	351	303	0.79	3.47	(-29.1, -41.5, -27.9)
	m 19-1	349	305	0.78	3.43	(-29.7, -41.4, -27.0)
	m 20-1	356	335	0.72	3.19	(-28.9, -41.1, -27.4)
1BIV-G1	m 1-1	1013	585	0.83	5.19	(-28.8, -28.8, -20.6)
	m 2-1	894	587	0.76	4.56	(-32.1, -28.7, -21.2)
	m 3-1	1082	657	0.78	4.94	(-30.2, -27.2, -18.0)
	m 4-1	1118	663	0.78	5.05	(-32.9, -26.2, -20.4)
	m 5-1	1093	640	0.8	5.12	(-31.1, -28.3, -22.5)
1Z2J-G2	m 1-2	1192	728	0.75	4.91	(-28.8, -40.4, -25.9)
	m 3-2	1370	802	0.72	4.88	(-26.9, -40.2, -25.0)
	m 4-2	1364	806	0.74	5.07	(-29.0, -40.1, -25.9)
	m 5-2	1359	801	0.74	5.09	(-29.5, -40.5, -24.9)
	m 6-2	1441	807	0.76	5.35	(-29.1, -40.9, -27.0)
	m 7-2	1318	809	0.72	4.89	(-29.3, -40.4, -25.1)
	m 9-2	1486	882	0.71	5.05	(-30.0, -40.0, -26.1)
	m 10-2	1242	760	0.73	4.9	(-29.6, -42.4, -25.7)
	m 11-2	1413	826	0.74	5.13	(-29.3, -40.9, -26.5)
	m 12-2	1255	747	0.75	5.04	(-30.0, -40.2, -25.9)
	m 13-2	1293	745	0.77	5.21	(-26.4, -40.8, -26.4)
	m 15-2	1379	844	0.71	4.9	(-30.9, -43.2, -24.0)
	m 16-2	1072	646	0.78	4.97	(-27.0, -40.9, -25.9)
	m 17-2	1413	828	0.73	5.11	(-28.9, -41.3, -26.5)
	m 18-2	1196	733	0.74	4.89	(-30.7, -42.3, -27.1)
	m 19-2	1131	687	0.76	4.94	(-28.6, -40.8, -26.8)
	m 20-2	1206	747	0.73	4.84	(-29.2, -43.4, -25.6)
2NC1-G3	m 1-3	490	415	0.72	3.54	(-44.2, -37.7, -41.5)
	m 2-3	524	433	0.72	3.62	(-44.3, -38.1, -41.3)
	m 3-3	495	403	0.75	3.68	(-45.1, -38.1, -41.3)
	m 4-3	464	392	0.74	3.55	(-44.1, -37.2, -40.7)
	m 5-3	439	381	0.73	3.45	(-44.1, -37.5, -41.6)
	m 6-3	520	432	0.72	3.61	(-44.3, -36.2, -41.6)
	m 7-3	480	387	0.76	3.71	(-44.9, -36.8, -43.7)
	m 8-3	484	398	0.75	3.64	(-44.2, -37.6, -41.7)
	m 9-3	556	464	0.7	3.59	(-43.0, -34.8, -41.6)
	m 10-4	473	406	0.72	3.49	(-43.7, -36.3, -41.7)
2KXM-G1	m 1-1	553	364	0.89	4.55	(-21.6, -32.1, -25.0)
	m 2-1	394	275	0.94	4.29	(-24.8, -33.4, -24.2)
	m 3-1	875	594	0.74	4.42	(-23.6, -27.2, -23.0)
	m 4-1	436	302	0.92	4.33	(-25.2, -33.0, -26.1)
	m 5-1	500	321	0.95	4.66	(-24.4, -33.1, -25.2)
	m 6-1	335	243	0.96	4.13	(-24.8, -33.4, -26.5)
	m 7-1	604	407	0.85	4.45	(-24.3, -31.5, -24.9)
	m 8-1	477	334	0.88	4.28	(-23.5, -32.4, -25.4)
	m 9-1	623	410	0.87	4.62	(-26.3, -34.2, -22.9)
	m 10-1	624	428	0.82	4.37	(-23.4, -31.7, -24.8)
1AUD-G1	m 1-1	321	263	0.86	3.65	(-29.2, -32.0, -29.8)
	m 2-1	424	340	0.8	3.74	(-30.2, -30.3, -30.7)
	m 3-1	379	316	0.8	3.6	(-29.6, -31.6, -30.2)
	m 4-1	414	343	0.78	3.62	(-30.4, -28.2, -28.9)
	m 5-1	456	362	0.79	3.77	(-29.3, -31.8, -28.8)
	m 6-1	386	312	0.82	3.71	(-29.6, -30.6, -27.7)
	m 7-1	350	291	0.82	3.6	(-30.0, -32.2, -31.9)
	m 8-1	429	343	0.8	3.74	(-30.5, -30.3, -29.4)
	m 9-1	423	344	0.79	3.68	(-30.1, -27.4, -30.6)
	m 10-1	357	288	0.84	3.72	(-29.9, -28.3, -30.0)
	m 11-1	377	285	0.88	3.96	(-29.5, -32.5, -30.4)
	m 12-1	437	335	0.83	3.91	(-30.5, -28.3, -29.2)
	m 13-1	314	285	0.78	3.3	(-30.1, -28.3, -31.1)
	m 14-1	364	309	0.8	3.53	(-31.9, -28.2, -28.9)
	m 15-1	341	300	0.79	3.4	(-36.3, -27.7, -26.5)
	m 16-1	399	327	0.8	3.66	(-33.3, -32.4, -30.0)
	m 17-1	481	345	0.86	4.18	(-27.7, -29.0, -29.3)
	m 18-1	424	352	0.77	3.6	(-27.9, -31.5, -30.1)
	m 19-1	543	381	0.84	4.2	(-27.4, -29.3, -30.5)
	m 20-1	278	243	0.85	3.43	(-32.0, -32.7, -31.9)
	m 21-1	329	272	0.85	3.62	(-30.0, -32.5, -31.7)
	m 22-1	490	366	0.82	4.01	(-27.5, -30.3, -30.9)
	m 23-1	411	328	0.81	3.75	(-31.1, -27.1, -27.9)
	m 24-1	389	318	0.81	3.67	(-30.3, -30.1, -30.4)
	m 25-1	543	397	0.81	4.1	(-29.7, -29.6, -30.2)
	m 26-1	468	359	0.81	3.91	(-29.8, -27.4, -27.3)
	m 27-1	508	388	0.79	3.92	(-30.5, -30.2, -29.3)
	m 28-1	349	303	0.79	3.45	(-31.9, -29.1, -31.1)
	m 29-1	359	303	0.8	3.55	(-28.3, -32.2, -29.8)
	m 30-1	833	636	0.67	3.92	(-28.8, -26.7, -26.1)
5IEM-G2	m 1-2	518	367	0.85	4.23	(-51.2, -40.6, -30.3)
	m 2-2	516	377	0.82	4.1	(-51.6, -40.7, -28.6)
	m 3-2	470	351	0.83	4.01	(-51.5, -40.6, -30.2)
	m 4-2	449	347	0.82	3.88	(-51.0, -40.7, -29.2)
	m 5-2	482	361	0.82	4	(-51.6, -40.8, -30.1)
	m 6-2	407	333	0.8	3.66	(-50.6, -41.0, -30.7)
	m 7-2	397	307	0.85	3.88	(-51.0, -41.0, -30.7)
	m 8-2	503	363	0.84	4.15	(-51.2, -40.7, -29.5)
	m 9-2	305	260	0.84	3.51	(-52.2, -41.4, -30.8)
	m 10-2	375	314	0.8	3.57	(-51.6, -41.0, -30.6)
6VAR-G1	m 1-1	2067	1144	0.69	5.42	(-38.0, -33.4, -25.5)
	m 2-1	1763	1066	0.66	4.96	(-39.1, -30.5, -26.9)
	m 3-1	1801	1041	0.69	5.19	(-38.2, -33.3, -28.9)
	m 4-1	1990	1115	0.69	5.35	(-39.5, -30.5, -27.6)
	m 5-3	1715	1010	0.69	5.09	(-37.5, -32.2, -27.5)
	m 6-1	1840	1041	0.7	5.3	(-39.0, -32.0, -29.2)
	m 7-1	1915	1093	0.68	5.25	(-39.3, -31.3, -27.5)
	m 8-1	1910	1057	0.7	5.42	(-39.2, -34.6, -29.0)
	m 9-3	1427	843	0.73	5.07	(-39.5, -36.6, -26.5)
	m 10-1	1905	1091	0.68	5.24	(-39.4, -32.6, -28.3)
1T4L-G1	m 1-1	912	586	0.78	4.67	(-30.6, -30.5, -32.4)
	m 2-1	942	576	0.81	4.91	(-30.7, -30.1, -32.7)
	m 3-1	847	512	0.85	4.96	(-31.3, -31.2, -32.9)
	m 4-1	985	579	0.83	5.1	(-28.2, -29.4, -33.2)
	m 5-1	870	548	0.8	4.76	(-31.1, -32.0, -32.8)
	m 6-1	1096	671	0.77	4.89	(-31.2, -29.4, -31.3)
	m 7-1	1202	707	0.77	5.1	(-28.5, -31.7, -31.8)
	m 8-1	992	609	0.79	4.88	(-31.3, -31.3, -32.1)
	m 9-1	1046	610	0.82	5.14	(-30.1, -29.7, -33.1)
	m 10-1	1060	624	0.8	5.09	(-30.4, -31.0, -31.5)
	m 11-1	1026	629	0.78	4.89	(-30.9, -30.4, -31.8)
	m 12-1	984	579	0.82	5.09	(-30.4, -31.4, -32.3)
	m 13-1	879	536	0.83	4.92	(-30.8, -31.3, -32.4)
	m 14-1	1033	621	0.79	4.98	(-30.6, -29.9, -32.0)
	m 15-1	614	410	0.85	4.49	(-30.0, -31.7, -32.5)
2L3E-G1	m 1-1	370	301	0.83	3.69	(-27.2, -43.4, -20.6)
	m 2-1	326	264	0.87	3.7	(-27.0, -45.5, -21.2)
	m 3-2	390	297	0.87	3.94	(-27.4, -41.1, -20.6)
	m 5-1	252	228	0.84	3.3	(-28.0, -45.7, -21.7)
	m 6-1	287	256	0.82	3.35	(-26.2, -43.2, -21.5)
	m 7-1	229	209	0.87	3.29	(-28.0, -41.8, -22.2)
	m 8-1	330	275	0.84	3.59	(-27.0, -41.2, -21.2)
	m 9-2	297	260	0.83	3.43	(-27.0, -45.3, -21.6)
	m 11-1	300	257	0.84	3.49	(-27.6, -45.5, -21.1)
	m 12-1	261	237	0.83	3.3	(-27.4, -43.1, -22.0)
	m 15-1	239	207	0.9	3.45	(-27.1, -45.8, -22.6)
	m 16-1	395	303	0.86	3.9	(-26.2, -43.7, -23.2)
	m 17-1	293	250	0.85	3.51	(-27.1, -45.1, -21.5)
	m 18-1	268	233	0.86	3.44	(-27.5, -43.4, -22.3)
	m 19-1	390	266	0.83	3.48	(-27.4, -41.5, -21.1)
	m 20-1	286	254	0.83	3.37	(-27.4, -45.8, -21.6)
1BYJ-G2	m 1-2	270	239	0.84	3.38	(-27.9, -31.5, -25.4)
	m 3-1	366	296	0.83	3.7	(-26.7, -33.2, -24.9)
	m 5-1	343	283	0.84	3.63	(-26.7, -33.4, -24.7)
	m 7-1	398	324	0.81	3.68	(-26.5, -32.3, -24.8)
	m 9-1	365	311	0.79	3.52	(-26.8, -32.4, -24.7)
	m 13-1	334	277	0.84	3.61	(-27.2, -32.8, -24.5)
	m 14-1	285	245	0.85	3.48	(-27.2, -33.8, -25.3)
	m 15-1	365	311	0.79	3.52	(-26.8, -32.4, -24.7)
	m 16-1	369	297	0.84	3.73	(-27.2, -32.4, -25.1)
	m 17-1	323	279	0.81	3.46	(-27.0, -31.4, -25.1)
	m 21-1	388	324	0.79	3.59	(-26.5, -30.3, -24.7)
	m 22-1	293	249	0.86	3.53	(-27.0, -34.1, -24.5)
	m 25-1	362	312	0.79	3.48	(-26.8, -32.5, -24.7)
	m 26-1	350	276	0.87	3.8	(-27.1, -31.9, -23.9)
	m 27-1	284	252	0.83	3.38	(-27.0, -34.1, -24.1)
	m 29-1	391	326	0.79	3.59	(-26.5, -32.3, -23.7)
	m 31-1	362	283	0.87	3.82	(-26.5, -33.4, -24.9)
	m 32-1	337	282	0.83	3.58	(-26.8, -33.5, -24.8)
	m 36-1	286	238	0.88	3.6	(-26.9, -34.1, -24.4)
	m 37-1	261	232	0.85	3.37	(-27.6, -32.1, -25.0)
2N7X-G1	m 1-1	901	618	0.73	4.37	(-24.3, -26.0, -26.7)
	m 2-1	797	536	0.78	4.46	(-23.8, -28.6, -28.1)
	m 3-1	793	574	0.72	4.14	(-23.9, -28.6, -28.3)
	m 4-1	817	535	0.79	4.58	(-24.0, -29.0, -29.1)
	m 5-1	1083	676	0.75	4.8	(-24.3, -27.9, -24.5)
	m 6-1	1063	659	0.76	4.84	(-24.0, -28.1, -24.6)
	m 7-1	1217	770	0.72	4.74	(-23.5, -23.9, -23.0)
	m 8-1	1164	753	0.71	4.63	(-24.1, -26.4, -21.3)
	m 9-1	1181	748	0.72	4.73	(-24.4, -24.2, -22.0)
	m 10-1	1001	613	0.79	4.9	(-24.0, -28.3, -27.4)
	m 11-1	1154	718	0.74	4.82	(-24.3, -25.3, -23.6)
	m 12-1	1126	761	0.69	4.43	(-23.5, -24.8, -21.5)
	m 13-1	1176	721	0.75	4.89	(-24.3, -25.2, -22.9)
	m 14-1	1200	686	0.8	5.25	(-24.2, -26.0, -24.1)
	m 15-1	1041	636	0.78	4.91	(-23.8, -26.9, -20.8)
	m 16-1	1025	638	0.77	4.81	(-24.3, -25.6, -24.6)
	m 17-1	1065	695	0.72	4.59	(-24.1, -26.6, -23.9)
	m 18-1	1227	708	0.78	5.19	(-23.6, -25.3, -21.9)
	m 19-1	1178	704	0.77	5.02	(-23.3, -25.2, -23.4)
	m 20-1	938	576	0.8	4.88	(-24.0, -25.5, -28.0)
1S34-G1	m 1-1	1123	676	0.77	4.98	(-26.3, -20.7, -24.3)
	m 2-1	1353	854	0.69	4.75	(-27.7, -21.4, -22.0)
	m 3-1	1189	719	0.75	4.96	(-26.4, -21.3, -23.4)
	m 4-1	1213	691	0.8	5.26	(-27.6, -22.7, -22.5)
	m 5-1	1123	678	0.77	4.97	(-29.2, -22.9, -22.7)
	m 6-1	1434	891	0.69	4.82	(-27.5, -20.6, -23.1)
	m 7-1	1255	723	0.78	5.21	(-26.8, -23.1, -23.2)
	m 8-1	1349	767	0.77	5.27	(-28.2, -21.5, -23.5)
	m 9-1	1192	658	0.83	5.43	(-27.6, -25.4, -22.6)
	m 10-1	1261	717	0.79	5.27	(-28.2, -23.9, -23.5)
	m 11-1	1341	762	0.77	5.28	(-28.2, -21.1, -23.5)
	m 12-1	1430	825	0.74	5.2	(-28.0, -22.8, -22.4)
	m 13-1	1646	932	0.72	5.29	(-26.6, -21.7, -23.1)
	m 14-1	1163	668	0.8	5.22	(-27.6, -22.4, -22.5)
	m 15-1	1137	677	0.78	5.04	(-28.2, -24.4, -23.5)
2QH2-G2	m 4-2	197	209	0.78	2.83	(-25.3, -35.3, -26.7)
	m 12-1	211	223	0.77	2.84	(-24.7, -36.2, -25.8)
	m 17-2	204	217	0.77	2.82	(-24.5, -35.8, -26.7)
	m 18-2	192	200	0.8	2.88	(-24.5, -37.6, -26.5)
2NC1-G2	m 1-2	2216	1413	0.58	4.7	(-42.3, -33.1, -31.6)
	m 2-2	1433	893	0.69	4.81	(-42.0, -35.2, -36.9)
	m 3-2	2071	1272	0.62	4.88	(-42.2, -33.8, -32.0)
	m 4-1	1366	904	0.66	4.53	(-42.0, -34.9, -36.2)
	m 5-1	1282	831	0.69	4.63	(-41.9, -36.0, -37.3)
	m 6-2	2024	1244	0.62	4.88	(-42.5, -33.5, -32.8)
	m 7-2	2141	1289	0.62	4.98	(-42.8, -32.5, -34.9)
	m 8-1	1510	916	0.69	4.95	(-41.8, -35.4, -36.2)
	m 9-1	1422	884	0.69	4.82	(-41.6, -35.1, -36.5)
	m 10-2	1372	876	0.68	4.69	(-41.8, -35.8, -37.0)
1K6H-G1	m 1-1	1290	804	0.71	4.81	(-21.7, -25.5, -20.1)
	m 2-1	988	679	0.71	4.36	(-22.0, -29.1, -21.2)
	m 3-1	1185	738	0.73	4.82	(-21.4, -25.8, -20.5)
	m 4-1	860	581	0.75	4.44	(-21.6, -28.3, -23.7)
	m 5-1	1211	768	0.71	4.73	(-21.3, -25.6, -20.8)
	m 6-1	962	665	0.71	4.34	(-23.9, -27.7, -21.1)
	m 7-1	1090	709	0.72	4.61	(-21.3, -25.5, -20.7)
	m 8-1	874	592	0.75	4.43	(-21.7, -28.4, -23.0)
	m 9-1	1037	646	0.77	4.81	(-24.4, -28.7, -21.3)
	m 10-1	1044	659	0.75	4.75	(-24.2, -28.9, -21.4)
	m 11-1	1035	700	0.71	4.43	(-22.1, -25.8, -19.9)
	m 12-1	1064	680	0.74	4.69	(-21.3, -28.7, -20.4)
	m 13-1	1108	726	0.71	4.58	(-21.2, -28.4, -20.8)
	m 14-1	1016	659	0.74	4.62	(-21.6, -28.3, -21.2)
	m 15-1	1136	707	0.74	4.82	(-22.0, -26.5, -20.3)
	m 16-1	874	604	0.73	4.34	(-24.5, -28.1, -21.6)
	m 17-1	1024	634	0.76	4.77	(-24.2, -29.9, -21.3)
	m 18-1	852	577	0.75	4.43	(-24.5, -29.8, -21.8)
	m 19-1	1163	722	0.74	4.83	(-21.2, -27.0, -19.6)
	m 20-1	1037	722	0.69	4.31	(-21.3, -28.8, -20.8)
5KQE-G2	m 1-2	826	607	0.7	4.08	(-38.6, -25.3, -29.8)
	m 2-2	523	420	0.75	3.37	(-36.6, -25.9, -31.9)
	m 3-2	795	591	0.7	4.03	(-38.6, -24.4, -29.9)
	m 4-2	534	401	0.79	3.99	(-36.9, -25.1, -31.0)
	m 5-2	769	559	0.73	4.13	(-38.3, -26.3, -29.9)
	m 6-2	531	404	0.78	3.94	(-38.5, -24.4, -31.3)
	m 7-2	569	459	0.72	3.72	(-35.1, -24.4, -31.7)
	m 8-2	514	406	0.76	3.79	(-36.7, -25.4, -31.2)
	m 9-2	807	604	0.69	4	(-37.6, -24.4, -29.8)
	m 10-2	740	572	0.69	3.88	(-35.4, -25.1, -30.0)
	m 11-2	559	419	0.78	3.99	(-40.1, -26.5, -30.4)
	m 12-2	592	428	0.8	4.14	(-39.0, -25.3, -31.4)
	m 13-2	539	398	0.8	4.05	(-39.1, -25.5, -31.3)
	m 14-2	760	545	0.74	4.18	(-38.4, -25.3, -30.4)
	m 15-2	501	395	0.77	3.8	(-36.4, -25.2, -32.0)
	m 16-2	562	445	0.74	3.79	(-35.6, -24.4, -31.0)
	m 17-2	482	392	0.76	3.69	(-36.8, -25.9, -31.8)
	m 18-2	489	379	0.79	3.87	(-39.2, -25.5, -31.7)
	m 19-2	433	346	0.8	3.75	(-41.0, -27.5, -31.4)
	m 20-2	723	552	0.7	3.92	(-38.5, -26.3, -29.7)
1ULL-G2	m 1-2	1242	751	0.74	4.96	(-31.4, -26.4, -30.2)
	m 4-1	996	640	0.75	4.67	(-32.3, -25.1, -25.6)
	m 5-1	1114	688	0.76	4.86	(-36.0, -23.8, -24.5)
	m 6-2	968	643	0.74	4.51	(-33.5, -27.6, -24.9)
	m 7-2	1296	776	0.74	5.01	(-33.4, -26.3, -23.1)
5A18-G1	m 1-1	509	412	0.75	3.7	(-47.1, -23.6, -21.9)
	m 2-1	748	595	0.67	3.77	(-46.2, -22.7, -18.3)
	m 3-1	526	466	0.68	3.38	(-46.9, -25.4, -19.7)
	m 4-1	464	391	0.74	3.56	(-47.1, -24.5, -22.6)
	m 5-1	655	515	0.71	3.81	(-46.8, -22.8, -19.3)
	m 6-1	573	467	0.71	3.67	(-46.5, -22.9, -21.5)
	m 7-1	555	446	0.73	3.73	(-47.1, -23.4, -21.8)
	m 8-1	693	522	0.72	3.98	(-45.8, -23.6, -19.6)
	m 9-1	661	529	0.69	3.75	(-46.9, -23.7, -19.5)
	m 10-1	462	375	0.77	3.7	(-47.4, -24.5, -23.0)
2KTZ-G1	m 1-1	527	370	0.85	4.26	(-30.3, -29.3, -38.2)
	m 2-1	3178	1573	0.66	6.06	(-20.0, -23.8, -28.2)
	m 3-1	556	369	0.88	4.51	(-30.1, -30.1, -38.6)
	m 4-1	510	358	0.86	4.26	(-29.5, -29.4, -38.6)
	m 5-1	3386	1668	0.65	6.09	(-18.0, -22.9, -28.9)
	m 6-1	479	338	0.87	4.24	(-32.3, -29.3, -38.6)
	m 7-1	530	363	0.87	4.37	(-32.5, -29.5, -38.4)
	m 8-1	540	372	0.86	4.35	(-32.7, -29.8, -37.9)
	m 9-1	546	393	0.82	4.16	(-29.4, -29.4, -38.4)
	m 10-1	499	335	0.91	4.46	(-30.6, -29.2, -39.0)
6GZK-G2	m 1-2	876	567	0.78	4.63	(-32.6, -28.1, -34.5)
	m 2-2	792	549	0.75	4.32	(-32.8, -28.0, -34.5)
	m 3-2	777	530	0.77	4.39	(-32.8, -28.1, -34.4)
	m 4-2	719	472	0.82	4.56	(-33.6, -29.0, -35.7)
	m 5-2	881	570	0.78	4.64	(-32.5, -28.2, -34.5)
	m 6-2	837	565	0.76	4.44	(-32.4, -27.4, -34.2)
	m 7-2	661	477	0.77	4.15	(-37.0, -29.0, -34.2)
	m 8-2	671	506	0.73	3.98	(-36.1, -28.8, -35.3)
	m 9-2	714	480	0.8	4.46	(-33.2, -28.8, -34.7)
	m 10-2	837	566	0.76	4.43	(-32.6, -26.5, -34.8)
2MHI-G3	m 1-3	459	363	0.79	3.79	(-31.5, -41.1, -27.6)
	m 2-1	546	412	0.78	3.97	(-30.3, -41.2, -27.7)
	m 3-3	405	363	0.73	3.34	(-30.9, -40.6, -28.1)
	m 4-3	463	415	0.7	3.34	(-30.2, -40.6, -27.9)
	m 5-3	507	396	0.78	3.84	(-30.7, -40.2, -27.0)
	m 6-3	423	338	0.81	3.75	(-31.2, -41.7, -27.3)
	m 7-2	493	422	0.71	3.5	(-30.3, -40.0, -27.5)
	m 8-3	544	424	0.76	3.84	(-30.0, -39.6, -27.2)
	m 9-3	323	285	0.8	3.4	(-32.4, -41.9, -27.7)
	m 10-3	570	453	0.73	3.77	(-30.1, -39.3, -25.5)
	m 11-3	433	352	0.78	3.68	(-29.9, -41.5, -26.4)
	m 13-2	437	371	0.75	3.53	(-30.1, -41.3, -29.2)
	m 14-2	588	488	0.7	3.61	(-27.7, -39.8, -27.4)
	m 15-2	404	338	0.78	3.58	(-30.9, -42.0, -27.2)
	m 17-3	440	344	0.81	3.83	(-30.4, -41.5, -27.3)
	m 18-3	399	337	0.78	3.54	(-30.9, -41.5, -26.7)
	m 19-3	410	358	0.75	3.43	(-30.4, -40.7, -26.2)
	m 20-3	505	419	0.73	3.61	(-30.3, -40.4, -27.0)
2MIY-G2	m 1-2	843	542	0.8	4.66	(-38.8, -36.9, -28.5)
	m 2-3	748	524	0.76	4.28	(-39.0, -36.3, -29.0)
	m 3-3	667	461	0.8	4.34	(-38.0, -38.7, -25.8)
	m 4-3	709	474	0.81	4.48	(-39.7, -38.0, -28.5)
	m 5-2	1054	673	0.74	4.7	(-37.2, -34.2, -26.3)
	m 6-2	760	504	0.8	4.52	(-37.9, -36.9, -27.8)
	m 7-2	629	411	0.86	4.58	(-40.4, -36.7, -28.7)
	m 8-2	569	430	0.77	3.96	(-38.8, -37.9, -28.3)
	m 9-3	950	589	0.79	4.83	(-38.4, -36.7, -28.2)
	m 10-3	679	442	0.85	4.61	(-38.6, -39.9, -28.5)
	m 11-3	932	583	0.79	4.79	(-35.3, -35.7, -28.8)
	m 12-2	943	606	0.77	4.66	(-37.9, -37.1, -28.6)
	m 13-1	857	557	0.78	4.61	(-35.4, -36.8, -28.8)
	m 14-2	949	608	0.77	4.68	(-32.8, -34.7, -32.6)
	m 15-3	642	507	0.71	3.8	(-36.0, -39.9, -29.1)
	m 16-2	713	482	0.8	4.43	(-42.2, -37.3, -28.3)
	m 17-3	757	520	0.77	4.37	(-35.2, -36.3, -30.0)
	m 18-3	599	436	0.79	4.12	(-40.5, -40.0, -28.4)
2KPV-G1	m 1-1	2874	1581	0.62	5.45	(-22.5, -24.6, -20.1)
	m 2-1	2321	1397	0.61	4.98	(-22.6, -27.8, -19.7)
	m 3-1	2311	1392	0.61	4.98	(-22.9, -27.7, -21.4)
	m 4-1	2843	1563	0.62	5.45	(-22.5, -26.9, -21.2)
	m 5-1	2215	1296	0.63	5.13	(-23.3, -27.6, -23.5)
	m 6-1	2597	1488	0.61	5.24	(-23.7, -25.7, -20.9)
	m 7-1	2657	1504	0.62	5.3	(-25.0, -28.0, -19.5)
	m 8-1	2814	1502	0.64	5.62	(-22.3, -24.7, -18.7)
	m 9-1	2524	1481	0.61	5.11	(-22.3, -26.0, -19.3)
	m 10-1	2495	1416	0.63	5.28	(-22.8, -24.6, -23.2)
2GV3-G2	m 5-1	300	240	0.9	3.74	(-26.1, -32.1, -25.2)
	m 7-2	377	288	0.88	3.93	(-25.8, -30.3, -22.8)
	m 8-1	351	287	0.84	3.66	(-26.1, -29.5, -23.2)
	m 13-1	296	265	0.81	3.34	(-26.4, -31.2, -24.7)
	m 16-1	311	258	0.86	3.62	(-28.8, -32.4, -25.0)
	m 18-1	252	210	0.92	3.59	(-26.2, -33.0, -23.2)
	m 20-1	439	363	0.77	3.62	(-23.9, -28.6, -21.4)
2M22-G1	m 1-1	1132	762	0.69	4.45	(-21.3, -29.1, -23.1)
	m 2-1	1484	951	0.66	4.68	(-20.5, -27.0, -20.7)
	m 3-1	1312	828	0.7	4.75	(-21.0, -29.1, -23.0)
	m 4-1	1171	790	0.68	4.44	(-21.2, -29.0, -23.3)
	m 5-1	1155	788	0.68	4.39	(-20.5, -25.9, -19.7)
	m 6-1	1370	876	0.68	4.69	(-22.6, -26.1, -21.1)
	m 7-1	1408	879	0.69	4.8	(-21.6, -26.1, -20.9)
	m 8-1	1395	921	0.65	4.45	(-20.9, -26.0, -20.7)
	m 9-1	860	608	0.72	4.24	(-22.8, -28.0, -23.7)
	m 10-1	978	675	0.71	4.34	(-22.4, -28.2, -22.9)
	m 11-1	1373	860	0.69	4.79	(-23.1, -26.6, -20.7)
	m 12-1	1128	751	0.7	4.5	(-23.2, -26.3, -18.5)
	m 13-1	1520	928	0.69	4.91	(-20.8, -27.0, -20.7)
	m 14-1	1348	903	0.65	4.48	(-21.6, -24.9, -21.0)
	m 15-1	923	627	0.73	4.41	(-21.2, -29.1, -24.7)
	m 16-1	1412	867	0.7	4.88	(-22.8, -24.4, -20.7)
	m 17-1	1231	816	0.68	4.52	(-20.4, -26.1, -19.5)
	m 18-1	1038	690	0.72	4.51	(-21.4, -29.4, -22.9)
	m 19-1	1329	856	0.68	4.65	(-20.8, -25.5, -20.5)
	m 20-1	1429	875	0.7	4.89	(-22.8, -27.3, -20.7)
6VAR-G2	m 1-2	558	397	0.83	4.22	(-43.0, -40.3, -32.4)
	m 2-2	680	444	0.84	4.59	(-43.9, -36.3, -32.1)
	m 3-2	544	391	0.82	4.17	(-43.3, -40.0, -34.7)
	m 4-2	632	442	0.8	4.28	(-43.4, -37.6, -34.1)
	m 5-2	814	533	0.79	4.58	(-41.8, -38.0, -32.2)
	m 6-3	576	386	0.87	4.47	(-43.7, -37.7, -35.3)
	m 7-3	576	405	0.83	4.26	(-43.5, -38.4, -34.9)
	m 8-2	697	474	0.8	4.41	(-42.2, -39.8, -34.4)
	m 9-1	1727	1081	0.64	4.79	(-41.1, -29.4, -26.5)
	m 10-2	640	423	0.85	4.53	(-43.1, -39.4, -34.1)
2KD8-G1	m 1-1	1121	701	0.74	4.8	(-19.6, -30.0, -21.8)
	m 2-1	1114	689	0.75	4.85	(-20.0, -29.2, -24.2)
	m 3-1	732	476	0.83	4.61	(-20.6, -30.3, -23.1)
	m 4-1	1085	713	0.72	4.56	(-19.2, -26.8, -22.6)
	m 5-1	1375	804	0.74	5.13	(-19.3, -28.2, -21.2)
	m 6-1	1182	684	0.79	5.18	(-20.6, -30.5, -21.7)
	m 7-1	1337	834	0.7	4.81	(-19.5, -27.7, -23.8)
	m 8-1	1152	755	0.7	4.57	(-19.3, -27.6, -22.4)
	m 9-1	1415	820	0.74	5.18	(-20.1, -29.5, -24.4)
	m 10-1	1168	669	0.8	5.23	(-20.9, -30.2, -21.3)
	m 11-1	1288	804	0.71	4.8	(-20.9, -27.5, -21.9)
	m 12-1	1212	762	0.72	4.77	(-19.4, -28.2, -24.0)
2ES5-G2	m 1-2	437	324	0.86	4.04	(-26.0, -27.4, -24.2)
	m 3-1	341	271	0.87	3.77	(-25.3, -27.5, -24.4)
	m 5-1	364	268	0.92	4.06	(-27.4, -27.7, -24.9)
	m 6-1	530	372	0.85	4.26	(-25.7, -27.3, -24.2)
	m 7-1	559	387	0.85	4.33	(-22.7, -25.6, -24.8
	m 8-1	413	305	0.88	4.05	(-23.5, -27.9, -24.3)
	m 9-2	342	261	0.9	3.92	(-27.2, -28.9, -25.2)
	m 10-1	318	249	0.9	3.82	(-27.5, -27.6, -25.3)
	m 11-2	437	321	0.87	4.08	(-26.7, -28.0, -24.4)
	m 13-1	494	352	0.86	4.2	(-25.9, -25.8, -24.2)
	m 14-2	527	405	0.82	4.23	(-25.6, -26.6, -23.4)
	m 15-1	278	229	0.9	3.63	(-27.8, -28.2, -24.9)
	m 18-2	516	346	0.9	4.46	(-25.4, -26.3, -22.9)
	m 19-1	320	261	0.87	3.68	(-27.6, -28.4, -25.0)
	m 20-2	536	408	0.78	3.94	(-26.0, -27.5, -24.0)
2GIO-G1	m 1-1	1863	1162	0.63	4.81	(-20.3, -27.4, -21.6)
	m 2-1	1828	1139	0.63	4.81	(-20.3, -25.8, -21.4)
	m 3-1	1820	1132	0.64	4.82	(-20.3, -26.6, -21.3)
	m 4-1	1812	1130	0.64	4.81	(-20.2, -26.5, -21.6)
	m 5-1	1777	1080	0.66	4.94	(-20.2, -27.2, -21.5)
	m 6-1	1734	1107	0.63	4.7	(-20.3, -25.9, -21.5)
	m 7-1	1913	1151	0.65	4.98	(-20.3, -25.6, -21.3)
	m 8-1	1863	1167	0.63	4.79	(-20.3, -26.3, -21.4)
	m 9-1	1816	1142	0.63	4.77	(-19.5, -25.7, -21.4)
	m 10-2	1248	767	0.73	4.88	(-22.3, -32.3, -21.3)
	m 11-1	1837	1135	0.64	4.85	(-20.3, -26.9, -21.6)
	m 12-1	1644	985	0.68	5	(-20.1, -28.1, -22.1)
	m 13-1	1679	1007	0.68	5.05	(-19.2, -27.6, -21.8)
	m 14-1	1612	989	0.67	4.89	(-20.1, -27.9, -21.8)
	m 15-1	1720	1123	0.62	4.59	(-20.2, -25.9, -21.1)
	m 16-1	1801	1135	0.63	4.76	(-20.1, -26.9, -20.9)
	m 17-1	1634	1023	0.66	4.79	(-20.0, -27.3, -21.9)
	m 18-1	1779	1125	0.63	4.74	(-20.2, -26.0, -20.9
	m 19-1	1792	1131	0.63	4.75	(-20.1, -26.4, -20.5)
	m 20-1	1834	1146	0.63	4.8	(-20.3, -26.5, -21.4)
2M8K-G2	m 2-2	381	281	0.9	4.06	(-26.7, -47.0, -28.6)
	m 5-2	304	242	0.9	3.76	(-27.3, -48.0, -26.4)
	m 12-2	343	266	0.89	3.86	(-26.9, -45.6, -28.1)
	m 15-1	310	249	0.89	3.72	(-27.6, -45.9, -29.2)
2NBX-G1	m 1-1	8281	4504	0.44	5.52	(-44.7, -25.6, -15.7)
	m 2-1	8484	4611	0.44	5.52	(-42.7, -26.6, -15.6)
	m 3-1	8455	4533	0.44	5.59	(-44.8, -26.7, -16.3)
	m 4-1	6570	3595	0.48	5.63	(-49.4, -27.8, -23.1)
	m 5-1	8407	4575	0.44	5.51	(-44.7, -25.3, -16.2)
	m 6-1	7653	4135	0.45	5.55	(-44.6, -24.9, -20.7)
	m 7-1	8522	4607	0.44	5.55	(-43.8, -24.6, -15.5)
	m 8-1	8473	4532	0.44	5.61	(-44.8, -26.7, -15.4)
	m 9-1	8388	4529	0.44	5.56	(-41.9, -24.8, -16.4)
	m 10-1	8446	4584	0.44	5.53	(-44.7, -25.3, -16.4)
2MQT-G3	m 1-3	940	647	0.72	4.35	(-27.2, -23.8, -54.4)
	m 2-3	513	337	0.92	4.57	(-34.8, -31.8, -57.1)
	m 3-3	736	485	0.81	4.55	(-35.5, -28.3, -55.2)
	m 4-2	758	525	0.77	4.33	(-30.5, -24.9, -55.4)
	m 5-2	1106	705	0.73	4.71	(-31.8, -23.1, -56.3)
	m 7-3	483	336	0.89	4.31	(-32.3, -33.3, -56.8)
	m 8-3	773	519	0.78	4.47	(-31.9, -30.3, -54.0)
	m 9-2	750	488	0.82	4.61	(-32.1, -25.5, -58.0)
	m 10-2	802	521	0.8	4.62	(-33.4, -25.8, -58.3)
1JO7-G3	m 11-2	302	246	0.88	3.68	(-26.6, -41.3, -23.1)
	m 18-2	332	304	0.76	3.28	(-23.7, -44.6, -23.3)
	m 24-1	266	227	0.88	3.51	(-26.6, -41.9, -22.7)
2L3J-G1	m 1-1	7400	3802	0.48	5.84	(-19.1, -29.2, -19.4)
	m 2-1	7502	3810	0.49	5.91	(-17.6, -26.9, -20.2)
	m 3-1	7480	3820	0.48	5.87	(-19.1, -27.1, -19.9)
	m 4-1	7569	3841	0.49	5.91	(-21.0, -25.9, -19.6)
	m 5-1	7595	3841	0.49	5.93	(-17.9, -27.2, -21.5)
	m 6-1	7426	3875	0.47	5.75	(-17.4, -26.0, -21.6)
	m 7-1	7462	3796	0.49	5.9	(-19.0, -29.5, -17.1)
	m 8-1	7753	3952	0.48	5.89	(-19.1, -25.2, -18.7)
	m 9-1	7485	3825	0.48	5.87	(-19.0, -27.5, -21.2)
	m 10-1	7625	3831	0.49	5.97	(-17.9, -28.3, -21.2)
	m 11-1	7501	3755	0.49	5.99	(-18.3, -28.5, -18.4)
	m 12-1	7515	3842	0.48	5.87	(-18.1, -27.5, -20.3)
	m 13-1	7461	3820	0.48	5.86	(-16.6, -28.0, -22.4)
	m 14-1	7562	3810	0.49	5.95	(-20.8, -28.1, -17.4)
	m 15-1	7281	3781	0.48	5.78	(-18.7, -26.8, -18.0)
	m 16-1	7460	3804	0.49	5.88	(-17.8, -26.0, -18.7)
	m 17-1	7541	3805	0.49	5.94	(-20.7, -26.8, -16.0)
	m 18-1	7615	3902	0.48	5.85	(-17.5, -27.1, -19.9)
	m 19-1	7747	3928	0.48	5.92	(-21.4, -26.9, -18.9)
2LBS-G2	m 1-2	884	531	0.84	4.99	(-23.4, -33.3, -27.1)
	m 2-2	1107	633	0.82	5.25	(-22.6, -33.4, -27.0)
	m 3-2	1053	602	0.83	5.24	(-22.8, -33.0, -28.2)
	m 4-2	1032	594	0.83	5.21	(-23.4, -33.7, -27.7)
	m 5-2	1005	597	0.81	5.05	(-23.2, -33.3, -27.3)
	m 6-2	862	547	0.8	4.73	(-23.5, -34.3, -27.2)
	m 7-2	1038	590	0.84	5.27	(-26.9, -32.2, -26.5)
	m 8-2	975	567	0.84	5.15	(-23.2, -34.1, -28.6)
	m 9-2	935	554	0.83	5.06	(-23.4, -34.0, -27.6)
	m 10-2	946	569	0.82	4.98	(-23.5, -34.2, -28.2)
	m 11-2	915	564	0.81	4.86	(-23.2, -34.5, -27.9)
	m 14-2	990	594	0.81	5	(-22.8, -34.0, -27.4)
	m 15-1	890	560	0.8	4.77	(-22.9, -34.5, -27.3)
	m 16-2	944	572	0.81	4.95	(-22.3, -32.7, -28.0)
6U79-G2	m 1-2	536	400	0.8	4.02	(-22.0, -44.4, -26.5)
	m 2-2	589	413	0.82	4.28	(-24.2, -42.0, -25.5)
	m 8-2	423	305	0.89	4.16	(-23.8, -42.9, -27.0)
	m 10-2	669	452	0.82	4.44	(-23.0, -44.0, -25.1)
2FDT-G1	m 1-1	1274	700	0.81	5.45	(-33.6, -29.2, -27.1)
	m 2-1	871	486	0.91	5.37	(-33.3, -31.2, -28.2)
	m 3-1	1303	713	0.81	5.48	(-32.3, -27.1, -25.2)
	m 4-1	1022	585	0.84	5.23	(-36.1, -27.1, -27.3)
	m 5-1	1111	632	0.82	5.27	(-34.9, -25.6, -27.7)
	m 6-1	1258	694	0.81	5.43	(-33.7, -29.1, -23.4)
	m 7-1	963	567	0.83	5.09	(-33.0, -30.8, -25.1)
	m 8-1	1173	642	0.84	5.48	(-37.0, -26.5, -23.2)
	m 9-1	1204	678	0.81	5.32	(-35.2, -26.1, -27.3)
	m 10-1	1097	676	0.76	4.86	(-35.5, -28.3, -21.7)
	m 11-1	1296	726	0.79	5.35	(-32.6, -29.4, -27.5)
2N8V-G1	m 1-1	5132	2719	0.53	5.66	(-26.0, -27.3, -38.6)
	m 2-1	4219	2219	0.57	5.7	(-29.0, -37.2, -35.7)
	m 3-1	5041	2659	0.53	5.69	(-27.8, -24.2, -40.2)
	m 4-1	4956	2629	0.53	5.66	(-28.2, -26.0, -37.9)
	m 5-1	3919	2138	0.56	5.5	(-30.0, -34.9, -34.5)
	m 6-1	4036	2084	0.59	5.81	(-29.9, -33.9, -35.4)
	m 7-1	3823	2056	0.58	5.58	(-29.7, -33.9, -38.7)
	m 8-1	5209	2707	0.54	5.77	(-24.2, -27.4, -38.5)
	m 9-1	5413	2908	0.51	5.58	(-23.8, -28.9, -35.0)
	m 10-1	5277	2939	0.5	5.39	(-25.5, -26.9, -26.6)
2KE6-G2	m 1-2	1567	1004	0.65	4.68	(-27.4, -24.1, -45.8)
	m 2-2	1558	1007	0.64	4.64	(-28.9, -24.4, -44.9)
	m 3-2	1551	1004	0.65	4.63	(-28.7, -23.3, -44.7)
	m 4-2	1545	1034	0.62	4.48	(-28.7, -24.4, -43.9)
	m 5-2	1730	1040	0.67	4.99	(-32.2, -23.6, -42.5)
	m 6-2	1499	993	0.64	4.53	(-29.0, -23.4, -43.9)
	m 7-2	1419	981	0.64	4.56	(-29.0, -24.2, -46.0)
	m 8-2	1812	1072	0.67	5.07	(-29.3, -22.5, -41.3)
	m 9-2	1265	761	0.74	4.99	(-33.0, -25.0, -45.0)
	m 10-3	1650	1110	0.61	4.46	(-28.5, -23.7, -42.7)
	m 11-2	1470	997	0.63	4.42	(-27.7, -24.3, -44.9)
	m 12-2	1254	750	0.75	5.02	(-32.5, -25.6, -46.0)
1FYO-G3	m 3-2	458	363	0.79	3.78	(-23.3, -34.0, -23.3)
	m 21-2	533	414	0.77	3.86	(-23.5, -32.5, -23.1)
	m 24-2	352	285	0.84	3.69	(-23.8, -35.9, -23.8)
2M24-G2	m 3-2	255	216	0.9	3.54	(-36.5, -26.3, -23.6)
	m 8-2	436	347	0.8	3.77	(-36.8, -23.7, -23.9)
	m 9-2	452	346	0.82	3.92	(-36.1, -23.3, -21.6)
	m 11-2	233	212	0.86	3.29	(-37.0, -27.5, -25.6)
	m 13-2	336	282	0.83	3.56	(-35.0, -25.8, -24.6)
	m 18-2	375	307	0.82	3.66	(-37.0, -25.8, -24.0)
	m 20-2	389	314	0.82	3.71	(-36.6, -23.5, -24.0)
2L2K-G1	m 1-1	3598	1989	0.57	5.43	(-17.1, -23.5, -27.1)
	m 2-1	2835	1593	0.61	5.34	(-21.5, -26.7, -30.2)
	m 3-1	2360	1332	0.64	5.31	(-26.1, -28.1, -35.6)
	m 4-1	2239	1311	0.63	5.12	(-23.2, -27.4, -37.2)
	m 5-1	2440	1357	0.65	5.39	(-23.5, -27.7, -35.9)
	m 6-1	2544	1410	0.64	5.41	(-24.4, -29.3, -33.0)
	m 7-1	2901	1829	0.54	4.76	(-16.9, -26.0, -31.3)
	m 8-1	3606	1975	0.58	5.48	(-16.0, -24.6, -28.2)
	m 9-1	3635	2017	0.57	5.4	(-19.6, -24.9, -26.7)
	m 10-1	3373	2028	0.54	4.99	(-15.6, -24.2, -30.8)
	m 11-1	3202	1899	0.55	5.06	(-18.5, -26.4, -29.3)
	m 12-1	2166	1305	0.62	4.98	(-24.9, -29.9, -34.5)
	m 13-1	2294	1322	0.64	5.21	(-22.2, -27.6, -36.0)
	m 14-1	3058	1856	0.55	4.94	(-17.2, -25.2, -30.4)
	m 15-1	2411	1345	0.65	5.38	(-23.6, -28.1, -34.7)
	m 16-1	2024	1163	0.66	5.22	(-24.7, -29.1, -38.1)
	m 17-1	2423	1334	0.65	5.45	(-24.1, -27.5, -34.1)
	m 18-1	3339	1934	0.56	5.18	(-18.1, -24.1, -27.6)
	m 19-1	2308	1278	0.66	5.41	(-24.9, -28.1, -35.6)
	m 20-1	2301	1371	0.61	5.03	(-22.2, -28.3, -35.2)
6XB7-G1	m 1-1	1989	1075	0.71	5.55	(-21.7, -32.4, -32.7)
	m 2-1	1716	1022	0.68	5.04	(-20.7, -31.7, -34.7)
	m 3-1	2382	1339	0.64	5.33	(-18.2, -32.3, -32.1)
	m 4-1	1974	1024	0.74	5.78	(-20.7, -32.3, -33.0)
	m 5-1	2170	1104	0.73	5.89	(-20.6, -35.0, -34.6)
	m 6-1	1872	983	0.75	5.71	(-24.6, -32.9, -33.6)
	m 7-1	1904	1028	0.72	5.55	(-22.8, -31.8, -35.3)
	m 8-1	1824	1020	0.73	5.66	(-24.7, -32.1, -34.5)
	m 9-1	2160	1179	0.69	5.49	(-22.3, -30.9, -36.0)
	m 10-1	1998	1049	0.73	5.71	(-21.0, -32.1, -33.5)
2L94-G2	m 1-2	2468	1324	0.67	5.59	(-43.2, -24.3, -11.6)
	m 2-2	2511	1353	0.66	5.57	(-42.5, -23.7, -10.3)
	m 3-2	1967	1184	0.64	4.98	(-43.4, -24.2, -11.3)
	m 4-2	2456	1347	0.65	5.47	(-43.2, -24.5, -11.2)
	m 5-2	2463	1321	0.67	5.59	(-41.3, -26.2, -10.7)
	m 6-2	1899	997	0.74	5.71	(-42.7, -24.3, -17.6)
	m 7-2	2373	1305	0.66	5.45	(-41.1, -24.0, -13.3)
	m 8-2	2473	1323	0.67	5.6	(-41.0, -25.4, -11.8)
	m 9-2	1797	984	0.73	5.47	(-42.0, -24.3, -19.6)
	m 10-2	1492	880	0.72	5.09	(-45.1, -23.8, -19.6)
1HWQ-G2	m 1-2	362	307	0.8	3.53	(-23.6, -38.3, -29.2)
	m 4-2	509	403	0.76	3.79	(-25.4, -33.3, -26.1)
	m 11-2	310	254	0.87	3.66	(-26.8, -36.3, -25.6)
1IKD-G2	m 8-1	248	249	0.77	2.98	(-26.9, -24.5, -35.7)
	m 22-1	315	300	0.74	3.14	(-24.7, -25.8, -38.0)
	m 26-1	221	248	0.71	2.67	(-25.0, -26.8, -36.0)
2JYM-G1	m 1-1	1153	696	0.76	4.96	(-23.2, -29.5, -21.3)
	m 2-1	1143	697	0.76	4.92	(-23.2, -27.4, -21.0)
	m 3-1	503	350	0.87	4.31	(-25.0, -34.1, -24.7)
	m 4-1	915	637	0.72	4.31	(-24.2, -29.3, -22.0)
	m 5-1	1096	662	0.78	4.97	(-24.3, -27.4, -22.8)
	m 6-1	1068	663	0.76	4.83	(-23.9, -29.8, -21.2)
	m 7-1	898	622	0.72	4.33	(-24.7, -27.5, -22.4)
	m 8-1	946	634	0.73	4.47	(-24.3, -29.4, -22.2)
	m 9-1	1060	667	0.75	4.76	(-24.2, -30.4, -21.5)
	m 10-1	1032	661	0.75	4.68	(-26.3, -29.9, -22.8)
	m 11-1	1110	687	0.75	4.85	(-23.9, -27.3, -22.0)
	m 12-1	1166	700	0.76	4.99	(-24.0, -29.3, -21.1)
	m 13-1	1017	667	0.73	4.57	(-23.6, -30.0, -22.2)
	m 14-1	1088	676	0.76	4.83	(-23.3, -29.5, -21.5)
	m 15-1	1031	653	0.76	4.73	(-22.9, -29.6, -23.3)
2LI4-G1	m 1-1	483	371	0.8	3.9	(-23.5, -41.8, -24.3)
	m 2-1	229	218	0.83	3.15	(-25.2, -45.9, -28.8)
	m 3-2	259	234	0.84	3.32	(-27.5, -45.4, -26.8)
	m 5-1	350	303	0.79	3.45	(-24.3, -43.4, -28.3)
	m 7-1	375	315	0.8	3.56	(-23.4, -42.0, -27.3)
	m 9-1	280	261	0.79	3.21	(-24.2, -43.9, -25.5)
	m 10-1	341	278	0.85	3.67	(-24.7, -43.2, -28.4)
	m 11-1	385	305	0.84	3.78	(-23.0, -45.1, -26.3)
	m 12-1	339	299	0.79	3.4	(-24.0, -45.1, -24.5)
	m 13-1	366	300	0.82	3.65	(-23.4, -45.8, -28.3)
	m 14-1	394	301	0.86	3.92	(-23.0, -43.3, -28.4)
	m 17-1	236	223	0.83	3.17	(-25.5, -46.0, -25.5)
2HUA-G2	m 1-2	1123	844	0.62	3.99	(-43.9, -24.6, -15.7)
	m 2-2	1070	810	0.62	3.96	(-44.0, -22.3, -16.2)
	m 3-2	898	696	0.65	3.87	(-44.6, -23.2, -19.5)
	m 4-2	859	684	0.64	3.77	(-46.5, -23.2, -18.9)
	m 5-2	675	561	0.66	3.6	(-45.1, -25.1, -22.7)
	m 6-2	834	696	0.62	3.59	(-42.1, -23.4, -17.8)
	m 7-2	813	632	0.67	3.86	(-45.7, -24.1, -22.2)
	m 8-3	651	550	0.66	3.55	(-44.9, -24.9, -22.9)
	m 9-2	1023	776	0.63	3.95	(-43.7, -23.8, -15.1)
	m 10-2	999	808	0.6	3.71	(-45.8, -24.0, -15.6)
	m 11-2	772	645	0.63	3.59	(-45.2, -22.3, -22.7)
2NCI-G2	m 5-2	265	245	0.81	3.23	(-40.4, -28.1, -24.5)
	m 7-2	185	199	0.79	2.78	(-41.4, -28.8, -25.4)
	m 10-2	274	242	0.84	3.4	(-40.5, -28.0, -25.4)
1JP0-G1	m 3-1	425	351	0.78	3.63	(-25.5, -28.8, -22.1)
	m 11-1	452	373	0.76	3.63	(-28.0, -26.5, -21.7)
	m 12-1	334	264	0.88	3.79	(-24.7, -30.1, -24.0)
	m 14-1	545	425	0.76	3.84	(-27.2, -28.8, -23.5)
	m 17-1	247	235	0.81	3.14	(-24.8, -33.2, -25.1)
	m 19-1	512	407	0.76	3.77	(-23.3, -25.5, -21.2)
	m 20-1	423	338	0.8	3.75	(-25.5, -28.9, -24.3)
	m 21-1	384	339	0.75	3.39	(-26.8, -29.2, -21.9)
	m 23-1	333	266	0.87	3.75	(-24.8, -31.5, -24.0)
	m 24-1	439	371	0.75	3.54	(-23.3, -27.1, -23.2)
	m 27-1	472	372	0.79	3.8	(-28.3, -26.3, -21.5)
2M5U-G1	m 1-1	814	587	0.72	4.15	(-17.3, -29.1, -26.4)
	m 2-1	863	581	0.75	4.45	(-16.8, -29.2, -29.2)
	m 3-1	655	551	0.66	3.56	(-16.8, -27.5, -29.6)
	m 4-1	662	534	0.69	3.71	(-15.6, -28.1, -30.2)
	m 5-1	806	596	0.7	4.06	(-18.2, -27.5, -29.4)
	m 6-1	876	583	0.76	4.5	(-18.6, -29.3, -29.0)
	m 7-1	972	660	0.72	4.42	(-16.0, -26.7, -25.9)
	m 8-1	719	516	0.75	4.17	(-17.8, -30.2, -28.2)
	m 9-1	827	594	0.72	4.17	(-16.3, -27.4, -29.3)
	m 10-1	822	597	0.71	4.13	(-18.6, -28.4, -28.3)
	m 11-1	848	622	0.7	4.09	(-16.0, -27.7, -29.2)
	m 12-1	634	526	0.68	3.61	(-15.7, -28.3, -28.9)
	m 13-1	794	538	0.77	4.43	(-18.9, -30.9, -27.8)
	m 14-1	809	591	0.71	4.1	(-16.0, -29.6, -29.3)
	m 15-1	890	622	0.72	4.29	(-15.9, -30.5, -29.2)
2KE6-G1	m 1-1	1187	1161	0.63	4.85	(-28.1, -23.0, -42.2)
	m 2-1	1666	1070	0.63	4.67	(-29.0, -22.8, -43.2)
	m 3-1	1871	1184	0.62	4.74	(-27.9, -22.9, -43.0)
	m 4-1	1940	1160	0.65	5.01	(-28.0, -22.9, -43.2)
	m 5-1	2044	1323	0.59	4.63	(-26.6, -22.4, -41.6)
	m 6-1	1766	1139	0.62	4.65	(-27.1, -22.8, -43.1)
	m 7-1	1910	1118	0.67	5.12	(-27.3, -22.6, -44.7)
	m 8-1	2033	1282	0.61	4.76	(-25.3, -22.3, -41.3)
	m 9-1	2176	1167	0.7	5.59	(-27.2, -23.8, -46.3)
	m 10-1	1403	906	0.67	4.64	(-28.9, -21.7, -44.4)
	m 11-1	1893	1129	0.66	5.03	(-26.8, -21.8, -44.9)
	m 12-1	1769	1075	0.66	4.93	(-27.7, -25.5, -46.5)
2LBS-G1	m 1-1	322	251	0.91	3.85	(-24.0, -38.3, -29.4)
	m 2-1	316	255	0.88	3.71	(-23.7, -39.1, -29.8)
	m 3-1	310	245	0.9	3.79	(-23.7, -39.4, -30.2)
	m 4-1	354	280	0.86	3.78	(-23.4, -38.7, -29.6)
	m 5-1	375	285	0.88	3.94	(-23.1, -39.0, -29.5)
	m 6-1	266	217	0.92	3.67	(-24.5, -40.3, -29.7)
	m 7-1	437	317	0.88	4.13	(-24.7, -37.1, -29.5)
	m 8-1	291	245	0.87	3.56	(-23.1, -39.8, -29.8)
	m 9-1	329	249	0.93	3.96	(-24.1, -39.7, -30.0)
	m 10-1	287	226	0.93	3.8	(-24.3, -39.9, -30.2)
	m 11-1	314	251	0.89	3.75	(-23.0, -39.7, -30.1)
	m 12-1	1436	857	0.72	5.03	(-22.8, -30.3, -25.1)
	m 13-1	1331	843	0.69	4.73	(-20.6, -29.5, -26.2)
	m 14-1	391	305	0.85	3.84	(-22.9, -38.3, -29.0)
	m 15-2	376	293	0.86	3.85	(-23.2, -39.0, -29.4)
	m 16-1	354	287	0.84	3.69	(-22.6, -37.0, -30.1)
1MNX-G1	m 1-1	2102	1208	0.66	5.22	(-34.8, -26.7, -32.8）
	m 2-1	2501	1400	0.64	5.36	(-36.1, -28.0, -28.6)
	m 3-1	1227	712	0.78	5.17	(-35.6, -29.8, -34.6)
	m 4-1	2525	1371	0.65	5.52	(-35.4, -26.0, -31.8)
	m 5-1	1684	975	0.7	5.18	(-39.3, -25.6, -31.3)
	m 6-1	2279	1335	0.63	5.12	(-36.8, -25.4, -29.9)
	m 7-1	2345	1273	0.67	5.52	(-33.4, -26.7, -31.2)
	m 8-1	1933	1160	0.65	5	(-37.0, -26.8, -32.9)
	m 9-1	1689	978	0.7	5.18	(-35.9, -26.7, -33.6)
	m 10-1	1729	988	0.7	5.25	(-35.5, -26.6, -33.8)
	m 11-1	2195	1262	0.65	5.22	(-34.6, -27.4, -29.8)
	m 12-1	2501	1400	0.64	5.36	(-36.1, -28.0, -28.6)
	m 13-1	1748	1026	0.68	5.11	(-37.8, -26.3, -33.7)
6NOA-G1	m 1-1	5336	2826	0.52	5.66	(-45.4, -19.9, -2.9)
	m 2-1	5143	2711	0.53	5.69	(-45.4, -24.4, -4.7)
	m 3-1	5573	2735	0.56	6.11	(-40.7, -20.8, -5.3)
	m 4-1	4216	2076	0.61	6.09	(-43.3, -23.8, -12.2)
	m 5-1	4384	2234	0.58	5.89	(-42.7, -25.8, -9.6)
	m 6-1	4441	2197	0.59	6.06	(-42.3, -27.9, -11.1)
	m 7-1	5637	2906	0.53	5.82	(-45.7, -22.9, -4.6)
	m 8-1	4492	2315	0.57	5.82	(-47.4, -22.1, -7.0)
	m 9-1	5202	2522	0.58	6.19	(-43.5, -27.5, -10.2)
	m 10-1	6102	3034	0.53	6.03	(-43.9, -24.2, -2.7)
1EXY-G2	m 3-2	298	269	0.8	3.31	(-33.4, -27.8, -31.2)
	m 4-2	716	565	0.68	3.8	(-30.0, -28.4, -31.5)
	m 6-2	276	251	0.81	3.29	(-34.4, -27.7, -33.3)
	m 8-2	333	276	0.84	3.61	(-37.6, -29.5, -29.6)
	m 9-2	509	389	0.79	3.92	(-33.2, -29.5, -31.4)
	m 12-2	269	247	0.81	3.26	(-36.2, -27.3, -33.4)
5KH8-G1	m 1-1	307	303	0.73	3.04	(-31.3, -32.3, -37.4)
	m 2-1	324	317	0.72	3.06	(-31.3, -31.0, -38.1)
	m 3-1	283	281	0.74	3.02	(-31.7, -31.5, -37.6)
	m 4-1	293	298	0.71	2.95	(-31.1, -32.1, -39.4)
	m 6-1	295	296	0.72	2.98	(-31.1, -31.4, -40.0)
	m 7-1	339	305	0.77	3.33	(-31.2, -30.7, -37.8)
	m 8-1	420	362	0.75	3.47	(-30.6, -30.7, -40.0)
	m 9-1	542	415	0.77	3.92	(-30.1, -30.5, -36.7)
	m 10-1	263	272	0.73	2.9	(-31.4, -31.9, -40.1)
	m 11-1	281	293	0.71	2.88	(-31.1, -32.3, -37.4)
	m 13-1	413	348	0.77	3.56	(-31.0, -30.8, -38.9)
	m 14-1	242	251	0.75	2.89	(-31.2, -31.3, -38.9)
	m 15-1	218	228	0.77	2.86	(-32.6, -32.7, -37.3)
	m 16-1	176	196	0.77	2.69	(-31.1, -31.9, -38.6)
	m 18-1	188	201	0.79	2.8	(-31.8, -34.5, -39.4)
	m 19-1	239	251	0.74	2.86	(-30.1, -32.6, -40.5)
2LKR-G8	m 4-4	519	381	0.82	4.08	(-48.8, -41.3, -66.7)
	m 5-4	445	364	0.77	3.66	(-48.5, -40.6, -65.4)
	m 6-4	708	520	0.74	4.08	(-46.5, -39.5, -67.4)
	m 7-3	756	485	0.83	4.67	(-48.5, -40.7, -66.5)
	m 8-4	632	449	0.79	4.22	(-49.2, -39.7, -65.5)
	m 9-3	713	469	0.82	4.56	(-47.7, -39.9, -66.1)
6MCF-G1	m 1-1	4757	2345	0.58	6.08	(-39.9, -27.2, -7.8)
	m 2-1	4681	2317	0.58	6.06	(-39.1, -27.1, -7.7)
	m 3-1	3492	1637	0.68	6.4	(-40.6, -27.6, -13.8)
	m 4-1	3541	1661	0.68	6.39	(-40.7, -26.4, -13.8)
	m 5-1	3534	1670	0.67	6.35	(-39.6, -26.6, -13.7)
	m 6-1	4738	2342	0.58	6.07	(-37.0, -29.0, -7.8)
	m 7-1	4770	2335	0.59	6.13	(-40.1, -27.3, -7.5)
	m 8-1	3468	1668	0.66	6.24	(-38.5, -26.5, -14.0)
	m 9-1	4633	2330	0.58	5.96	(-40.8, -29.5, -9.5)
	m 10-1	4837	2352	0.59	6.17	(-40.0, -27.1, -9.6)
2M8K-G1	m 2-1	477	342	0.86	4.18	(-26.7, -47.0, -27.5)
	m 4-1	578	406	0.83	4.27	(-27.0, -44.8, -25.4)
	m 5-1	502	363	0.84	4.14	(-26.2, -46.9, -25.6)
	m 6-1	376	291	0.86	3.86	(-27.2, -43.9, -29.5)
	m 7-1	595	410	0.83	4.34	(-26.8, -45.4, -27.3)
	m 8-1	650	434	0.83	4.49	(-25.9, -44.1, -27.2)
	m 9-1	1183	732	0.74	4.84	(-23.9, -40.7, -25.0)
	m 10-1	574	417	0.8	4.12	(-26.5, -44.9, -27.3)
	m 12-1	632	444	0.8	4.26	(-25.9, -42.8, -26.2)
	m 13-1	521	390	0.8	4	(-26.1, -45.5, -27.5)
	m 14-1	443	349	0.8	3.8	(-26.5, -46.9, -27.4)
	m 16-1	1010	681	0.71	4.44	(-23.8, -40.2, -25.2)
	m 17-1	632	446	0.8	4.24	(-26.1, -45.1, -24.7)
	m 18-1	648	450	0.8	4.32	(-25.9, -42.6, -25.2)
	m 19-1	664	461	0.8	4.31	(-26.1, -41.9, -25.5)
	m 20-1	1006	684	0.71	4.41	(-25.0, -40.7, -24.5)
2MIY-G3	m 1-3	398	318	0.82	3.75	(-41.9, -40.2, -28.8)
	m 2-2	535	386	0.82	4.15	(-39.6, -37.8, -29.1)
	m 3-2	558	411	0.8	4.06	(-36.7, -39.0, -27.1)
	m 4-1	723	474	0.82	4.57	(-38.4, -38.2, -28.7)
	m 5-3	690	488	0.77	4.24	(-41.3, -38.7, -25.5)
	m 6-1	741	488	0.81	4.55	(-39.2, -39.2, -28.5)
	m 7-1	932	580	0.79	4.81	(-37.3, -35.7, -27.4)
	m 8-1	757	479	0.84	4.73	(-36.3, -38.4, -28.5)
	m 9-2	619	443	0.79	4.19	(-39.9, -38.7, -28.4)
	m 10-2	681	503	0.74	4.06	(-39.0, -39.4, -26.1)
	m 12-3	501	366	0.83	4.1	(-40.8, -41.8, -29.4)
	m 13-2	985	677	0.71	4.36	(-37.3, -37.8, -25.6)
	m 14-3	329	294	0.78	3.35	(-37.5, -40.4, -33.2)
	m 15-2	524	395	0.8	3.98	(-37.6, -42.5, -28.6)
	m 16-1	527	384	0.82	4.11	(-41.5, -38.0, -29.1)
	m 17-2	412	305	0.88	4.04	(-36.3, -39.5, -31.3)
	m 18-1	540	399	0.8	4.05	(-38.9, -40.6, -28.9)
7LVA-G2	m 1-2	1612	907	0.73	5.33	(-51.6, -45.3, -46.2)
	m 2-2	1601	901	0.73	5.33	(-51.6, -45.3, -46.1)
	m 3-2	1617	914	0.73	5.3	(-51.5, -45.4, -46.1)
	m 4-3	1563	875	0.74	5.35	(-54.3, -40.5, -46.7)
	m 5-2	2676	1397	0.67	5.75	(-50.6, -43.4, -40.2)
	m 7-2	2653	1388	0.67	5.73	(-50.2, -44.4, -40.3)
	m 8-2	1757	1000	0.7	5.27	(-49.8, -41.0, -44.4)
	m 9-2	1530	881	0.73	5.21	(-48.4, -41.8, -46.0)
2LKR-G1	m 1-1	1495	783	0.81	5.73	(-43.5, -41.0, -59.5)
	m 3-1	1848	1036	0.7	5.35	(-45.1, -41.1, -57.6)
	m 4-2	1699	905	0.76	5.63	(-46.7, -40.7, -60.6)
	m 5-2	2102	1153	0.69	5.47	(-44.2, -39.6, -54.7)
	m 6-2	2015	1109	0.7	5.45	(-45.3, -39.5, -57.1)
	m 7-2	1536	843	0.76	5.46	(-46.0, -41.5, -58.7)
	m 8-3	1991	1135	0.67	5.26	(-45.3, -39.3, -53.9)
	m 9-2	1730	1010	0.69	5.14	(-45.7, -39.5, -57.6)
	m 10-2	1184	728	0.74	4.88	(-45.3, -43.9, -57.3)
2HNS-G2	m 1-2	381	319	0.8	3.58	(-24.8, -30.0, -22.6)
	m 3-2	514	383	0.81	4.02	(-23.3, -29.6, -24.6)
	m 6-2	459	359	0.8	3.83	(-24.3, -29.4, -22.5)
	m 8-1	391	323	0.8	3.62	(-25.5, -30.1, -25.0)
	m 10-2	507	388	0.79	3.91	(-23.4, -29.6, -22.5)
	m 13-1	385	312	0.82	3.7	(-26.5, -29.8, -24.7)
	m 16-1	449	358	0.79	3.76	(-24.9, -29.5, -22.1)
	m 17-1	293	244	0.87	3.6	(-26.0, -29.2, -25.5)
2EUY-G2	m 2-2	391	302	0.86	3.88	(-24.2, -42.0, -29.0)
	m 3-2	319	281	0.8	3.4	(-23.2, -40.6, -29.2)
	m 5-2	365	323	0.76	3.38	(-23.8, -41.1, -29.1)
	m 6-2	428	348	0.79	3.68	(-23.9, -39.7, -29.6)
	m 7-2	257	249	0.78	3.09	(-24.2, -44.9, -28.3)
	m 8-2	386	326	0.78	3.45	(-23.7, -41.3, -27.9)
	m 9-2	296	288	0.74	3.08	(-23.6, -39.8, -27.9)
	m 10-2	334	282	0.82	3.54	(-24.2, -39.8, -28.5)
	m 11-2	421	353	0.77	3.58	(-24.0, -43.7, -28.7)
	m 12-2	560	415	0.79	4.04	(-22.4, -37.0, -27.8)
	m 13-2	410	308	0.87	3.99	(-23.8, -40.2, -28.1)
	m 14-1	490	401	0.75	3.66	(-23.4, -40.9, -29.1)
	m 15-2	281	263	0.79	3.2	(-23.0, -41.8, -28.8)
2N7M-G3	m 1-3	481	325	0.91	4.43	(-49.4, -57.6, -45.6)
	m 2-3	627	399	0.89	4.71	(-49.3, -58.0, -43.5)
	m 4-3	702	454	0.84	4.63	(-50.5, -57.2, -43.3)
	m 5-3	507	351	0.88	4.33	(-48.7, -57.8, -42.7)
	m 7-3	850	538	0.81	4.74	(-49.7, -57.1, -41.1)
2NCI-G1	m 1-1	349	331	0.72	3.16	(-40.2, -29.5, -24.0)
	m 2-1	558	470	0.7	3.35	(-39.2, -26.3, -22.1)
	m 3-1	303	299	0.73	3.04	(-40.3, -29.7, -23.1)
	m 4-1	551	494	0.66	3.34	(-39.2, -24.2, -22.5)
	m 5-1	551	416	0.78	3.97	(-38.8, -27.3, -24.0)
	m 6-1	315	304	0.73	3.1	(-40.2, -30.4, -24.0)
	m 7-1	510	417	0.74	3.66	(-39.6, -26.0, -22.9)
	m 8-1	350	330	0.73	3.17	(-40.2, -30.3, -23.9)
	m 9-1	266	271	0.74	2.94	(-42.0, -30.4, -23.5)
	m 10-1	567	455	0.73	3.73	(-38.9, -25.9, -22.9)
2L2K-G2	m 2-2	530	424	0.75	3.75	(-31.5, -32.5, -38.5)
	m 4-2	575	441	0.76	3.91	(-33.8, -30.9, -40.5)
	m 5-2	575	431	0.77	4	(-32.9, -32.2, -40.4)
	m 6-2	439	368	0.76	3.57	(-33.3, -34.7, -38.8)
	m 15-2	222	226	0.78	2.94	(-39.0, -38.0, -40.0)
	m 16-2	412	355	0.75	3.48	(-32.5, -35.2, -40.8)
	m 17-2	555	461	0.71	3.61	(-31.6, -32.2, -38.2)
	m 19-2	283	278	0.75	3.05	(-39.0, -38.0, -41.0)
	m 20-2	493	421	0.72	3.51	(-32.7, -32.8, -40.7)
2KRL-G4	m 3-3	222	224	0.79	2.97	(-54.7, -44.7, -53.8)
	m 4-3	290	271	0.78	3.2	(-54.4, -41.3, -55.2)
	m 7-3	221	216	0.82	3.06	(-54.9, -41.9, -55.5)
	m 10-3	225	262	0.68	2.58	(-52.3, -44.7, -54.0)
1NEM-G1	m 1-1	794	506	0.82	4.7	(-23.8, -31.6, -19.8)
	m 2-1	897	565	0.79	4.75	(-23.0, -31.1, -19.4)
	m 3-1	824	547	0.78	4.52	(-22.2, -31.5, -20.4)
	m 4-1	311	242	0.91	3.84	(-24.8, -31.6, -25.0)
	m 5-1	545	380	0.85	4.3	(-24.7, -30.3, -23.0)
	m 6-1	799	504	0.83	4.75	(-23.1, -29.4, -18.9)
	m 7-1	895	576	0.78	4.65	(-22.2, -30.8, -19.5)
	m 8-1	855	551	0.79	4.65	(-23.1, -29.4, -19.1)
	m 9-1	748	503	0.79	4.46	(-23.8, -29.1, -21.1)
1S9S-G4	m 2-1	466	366	0.79	3.81	(-51.8, -39.3, -59.8)
	m 3-1	1248	917	0.61	4.08	(-32.6, -31.9, -60.4)
	m 5-1	514	400	0.78	3.85	(-51.7, -33.1, -59.1)
	m 6-1	1781	1173	0.61	4.55	(-32.9, -29.1, -58.3)
	m 7-1	4425	2354	0.55	5.64	(-29.2, -31.9, -55.0)
	m 8-1	708	552	0.7	3.84	(-38.7, -35.8, -58.1)
	m 9-1	508	386	0.8	3.94	(-37.7, -35.0, -69.1)
	m 10-1	447	356	0.79	3.76	(-36.0, -39.5, -65.7)
	m 11-1	713	560	0.69	3.81	(-28.7, -42.0, -64.8)
	m 12-2	789	611	0.68	3.87	(-44.2, -35.1, -57.8)
	m 13-1	802	600	0.7	4.01	(-48.1, -37.1, -63.9)
	m 14-1	476	375	0.79	3.81	(-37.2, -33.3, -61.1)
	m 15-1	466	353	0.82	3.96	(-38.0, -35.9, -67.2)
	m 16-1	796	606	0.69	3.94	(-48.4, -33.2, -59.8)
	m 17-2	551	401	0.81	4.11	(-35.8, -36.6, -69.3)
	m 18-2	2965	1602	0.62	5.55	(-32.0, -36.2, -57.9)
	m 19-1	706	552	0.69	3.84	(-38.9, -39.9, -59.8)
	m 20-1	846	631	0.69	4.02	(-31.8, -33.9, -63.2)
2LI4-G2	m 3-1	543	414	0.78	3.93	(-25.4, -46.3, -23.9)
	m 16-1	446	356	0.79	3.76	(-26.3, -46.6, -25.6)
	m 18-1	527	429	0.73	3.68	(-22.7, -43.8, -25.1)
2FEY-G2	m 1-2	355	265	0.91	4.02	(-27.6, -51.1, -25.3)
	m 3-2	490	387	0.78	3.8	(-27.6, -51.5, -22.8)
	m 4-2	558	409	0.8	4.08	(-25.1, -51.6, -23.5)
	m 5-2	503	373	0.82	4.04	(-24.8, -49.8, -25.5)
	m 7-2	526	378	0.83	4.17	(-25.9, -51.9, -25.0)
	m 8-3	291	231	0.92	3.77	(-27.0, -51.4, -26.2)
	m 9-2	504	360	0.85	4.19	(-27.7, -52.2, -24.7)

## Sheet: Intermediate flexibility pocket
Pocket group ID	Pocket ID	Volume (Å3)	Surface area (Å2)	Sphericity	Effective radius (Å)	Center of mass (Å)
1E95-G1	m 2-1	344	330	0.72	3.12	(-30.5, -33.9, -26.9)
	m 3-1	456	412	0.69	3.31	(-30.3, -35.5, -25.9)
	m 4-1	553	430	0.76	3.85	(-29.4, -37.0, -25.0)
	m 5-1	666	522	0.71	3.82	(-28.9, -35.3, -23.2)
	m 6-1	418	396	0.68	3.16	(-27.9, -34.4, -26.0)
	m 7-1	564	421	0.78	4.01	(-29.9, -33.5, -25.9)
	m 8-1	461	402	0.72	3.43	(-29.0, -32.8, -26.2)
	m 9-1	862	689	0.63	3.75	(-26.5, -33.4, -23.4)
	m 10-1	392	351	0.74	3.35	(-30.2, -33.7, -27.1)
	m 11-1	235	232	0.79	3.03	(-32.9, -36.8, -27.4)
	m 12-1	588	446	0.76	3.96	(-31.2, -35.3, -26.6)
	m 13-1	678	504	0.74	4.03	(-30.9, -32.9, -24.0)
	m 14-1	843	513	0.84	4.93	(-29.3, -36.1, -24.5)
	m 15-1	516	405	0.77	3.82	(-29.4, -34.0, -25.8)
2LKR-G3	m 1-3	1141	834	0.63	4.1	(-43.4, -34.9, -64.0)
	m 3-2	874	679	0.65	3.86	(-45.9, -36.3, -64.7)
	m 4-6	986	743	0.64	3.98	(-45.7, -34.7, -65.8)
	m 5-5	1265	978	0.58	3.88	(-45.9, -35.4, -59.8)
	m 6-6	957	722	0.65	3.97	(-46.0, -34.2, -64.7)
	m 7-5	846	644	0.67	3.94	(-45.3, -37.1, -64.5)
	m 8-5	889	656	0.68	4.06	(-44.8, -36.3, -62.4)
	m 9-5	1097	785	0.65	4.19	(-45.9, -35.4, -65.1)
	m 10-4	887	770	0.58	3.45	(-41.6, -35.9, -64.2)
2LUN-G3	m 4-1	478	405	0.73	3.54	(-30.5, -25.2, -34.7)
	m 6-2	468	417	0.7	3.36	(-29.5, -20.5, -35.2)
	m 7-2	422	375	0.72	3.37	(-29.8, -22.0, -34.3)
2MXL-G1	m 1-1	4907	2162	0.65	6.81	(-6.9, -19.3, -39.9)
	m 2-1	2215	1140	0.72	5.83	(-19.3, -24.9, -45.5)
	m 3-1	4188	2158	0.58	5.82	(-8.7, -21.4, -42.9)
	m 4-1	3923	1816	0.66	6.48	(-10.6, -21.2, -39.0)
	m 5-1	3788	2055	0.57	5.53	(-11.2, -21.6, -41.9)
	m 6-1	3889	1907	0.63	6.12	(-8.3, -21.4, -42.6)
	m 7-1	3410	1790	0.61	5.71	(-11.8, -20.5, -44.2)
	m 8-1	3839	1897	0.62	6.07	(-9.2, -22.8, -43.0)
	m 9-1	4497	2056	0.64	6.56	(-9.1, -22.9, -43.8)
	m 10-1	1698	896	0.77	5.68	(-22.5, -23.1, -49.6)
	m 11-1	3707	1838	0.63	6.05	(-9.4, -20.8, -48.2)
	m 12-1	4350	2024	0.64	6.45	(-5.7, -20.4, -43.3)
	m 13-1	5062	2219	0.64	6.84	(-7.2, -23.1, -39.5)
	m 14-1	3346	1773	0.61	5.66	(-11.1, -21.4, -43.1)
	m 15-1	3987	1905	0.64	6.28	(-9.2, -20.5, -42.2)
	m 16-1	3787	1788	0.66	6.35	(-14.5, -21.3, -38.1)
	m 17-1	4235	2083	0.61	6.1	(-4.1, -20.8, -42.8)
	m 18-1	3618	2006	0.57	5.41	(-12.0, -20.6, -44.8)
	m 19-1	3132	1483	0.7	6.33	(-14.2, -21.2, -45.0)
	m 20-1	3409	1492	0.73	6.85	(-13.8, -22.1, -43.9)
1EKZ-G2	m 1-2	284	253	0.82	3.36	(-29.6, -31.4, -35.4)
	m 2-2	300	260	0.83	3.45	(-29.4, -36.4, -26.7)
	m 4-2	459	336	0.86	4.09	(-28.3, -35.9, -26.1)
	m 5-2	394	310	0.84	3.8	(-30.9, -32.9, -28.5)
	m 30-2	344	270	0.88	3.82	(-30.1, -36.3, -28.0)
	m 35-2	393	309	0.84	3.81	(-33.2, -27.1, -31.8)
	m 36-2	304	282	0.77	3.23	(-29.6, -33.8, -32.1)
1R7W-G3	m 2-1	560	493	0.67	3.4	(-41.2, -27.7, -20.9)
	m 8-1	399	416	0.63	2.87	(-41.9, -25.2, -21.9)
	m 12-1	603	417	0.83	4.33	(-42.7, -24.5, -22.2)
	m 13-1	441	439	0.64	3.01	(-42.2, -26.4, -21.2)
	m 19-1	348	372	0.64	2.8	(-42.9, -26.7, -22.0)
1LVJ-G2	m 1-2	269	279	0.72	2.89	(-25.9, -43.0, -24.2)
	m 2-2	211	215	0.79	2.94	(-27.5, -39.1, -25.1)
	m 3-2	286	247	0.85	3.47	(-27.6, -42.3, -25.1)
	m 4-2	270	234	0.86	3.45	(-27.6, -43.1, -25.7)
	m 5-2	303	276	0.79	3.28	(-25.7, -46.4, -25.0)
	m 6-2	480	394	0.75	3.65	(-25.3, -39.8, -24.4)
	m 7-2	352	300	0.8	3.52	(-23.9, -41.3, -24.1)
	m 8-1	293	284	0.75	3.09	(-25.8, -41.4, -24.2)
	m 10-2	357	320	0.76	3.34	(-27.6, -43.8, -24.3)
	m 11-2	279	254	0.81	3.29	(-30.4, -41.6, -25.0)
	m 12-2	256	240	0.81	3.19	(-25.4, -47.4, -25.2)
1LVJ-G1	m 1-1	340	313	0.75	3.26	(-26.1, -43.5, -26.3)
	m 2-1	540	420	0.76	3.85	(-27.0, -36.0, -25.5)
	m 3-1	719	529	0.73	4.07	(-25.6, -38.7, -23.5)
	m 4-1	489	453	0.66	3.23	(-26.9, -38.1, -24.9)
	m 5-1	472	425	0.69	3.33	(-24.1, -43.5, -24.8)
	m 6-1	494	381	0.79	3.89	(-25.6, -40.7, -25.8)
	m 7-1	309	288	0.77	3.21	(-24.1, -41.7, -26.3)
	m 8-2	394	375	0.69	3.15	(-26.0, -40.3, -25.2)
	m 9-1	389	348	0.74	3.35	(-26.0, -40.4, -25.2)
	m 10-1	832	565	0.76	4.41	(-25.6, -40.8, -23.5)
	m 11-1	687	494	0.76	4.17	(-27.8, -38.6, -24.1)
	m 12-1	775	541	0.75	4.29	(-22.9, -43.5, -23.7)
2JWV-G1	m 1-1	852	584	0.74	4.37	(-37.4, -26.7, -23.0)
	m 2-1	2606	1321	0.69	5.92	(-29.7, -20.6, -20.9)
	m 3-1	2159	1280	0.63	5.06	(-31.4, -20.4, -18.3)
	m 4-1	2557	1312	0.69	5.85	(-31.4, -22.1, -19.3)
	m 5-1	2322	1290	0.66	5.4	(-33.3, -22.7, -18.6)
	m 6-1	2149	1237	0.65	5.21	(-32.3, -20.6, -18.8)
	m 7-1	2503	1301	0.69	5.77	(-33.0, -20.5, -19.0)
	m 8-1	2774	1314	0.73	6.33	(-30.4, -20.8, -20.8)
	m 9-1	2703	1341	0.7	6.05	(-29.8, -19.6, -21.0)
	m 10-1	2671	1383	0.67	5.79	(-32.9, -20.4, -20.0)
5IEM-G4	m 4-3	356	325	0.75	3.29	(-51.0, -41.3, -30.1)
	m 6-3	365	325	0.76	3.36	(-51.9, -41.4, -30.0)
	m 7-3	401	327	0.8	3.67	(-53.1, -42.4, -28.7)
	m 9-3	386	318	0.8	3.63	(-51.0, -42.3, -29.9)
	m 10-3	330	269	0.86	3.67	(-52.8, -42.0, -30.8)
6SNJ-G1	m 1-1	1456	826	0.76	5.32	(-23.1, -32.3, -25.5)
	m 2-1	1353	828	0.71	4.9	(-23.8, -30.4, -27.2)
	m 3-1	1326	813	0.72	4.89	(-24.4, -29.5, -24.7)
	m 4-1	1378	806	0.74	5.13	(-23.6, -31.0, -26.2)
	m 5-2	1416	819	0.74	5.18	(-22.0, -29.5, -27.8)
	m 6-1	1387	821	0.73	5.06	(-24.0, -29.4, -25.9)
	m 7-1	1416	808	0.75	5.25	(-24.4, -29.8, -24.0)
	m 8-1	1343	821	0.72	4.9	(-22.9, -30.7, -27.7)
	m 9-1	1376	826	0.72	4.99	(-22.5, -29.0, -25.7)
	m 11-1	1295	787	0.73	4.93	(-22.7, -31.3, -26.7)
	m 12-2	1427	823	0.74	5.2	(-23.7, -30.3, -25.8)
	m 14-1	1310	795	0.73	4.94	(-22.9, -29.7, -25.0)
	m 15-1	1370	797	0.75	5.16	(-23.2, -31.6, -25.4)
	m 16-1	1476	841	0.75	5.26	(-24.1, -30.7, -25.8)
	m 17-1	1183	713	0.76	4.97	(-25.0, -30.5, -26.8)
	m 18-1	1451	860	0.72	5.06	(-22.2, -31.5, -27.5)
2ES5-G1	m 1-1	367	318	0.78	3.46	(-28.1, -28.6, -21.1)
	m 2-1	264	225	0.88	3.52	(-27.1, -30.0, -24.4)
	m 9-1	319	270	0.84	3.54	(-27.6, -29.4, -22.3)
	m 11-1	351	273	0.88	3.85	(-26.2, -29.4, -24.1)
	m 14-1	337	293	0.8	3.45	(-28.1, -29.8, -21.9)
	m 16-1	845	589	0.73	4.3	(-23.0, -25.4, -22.7)
	m 17-1	1128	703	0.74	4.81	(-22.6, -29.2, -21.7)
	m 18-1	432	351	0.79	3.69	(-26.9, -28.6, -19.1)
	m 20-1	315	249	0.9	3.78	(-27.4, -30.2, -24.6)
7K4L-G1	m 1-1	2821	1521	0.63	5.56	(-29.7, -27.1, -16.2)
	m 2-1	3154	1700	0.61	5.57	(-39.1, -27.6, -11.0)
	m 3-1	3032	1727	0.59	5.27	(-34.1, -27.4, -15.3)
	m 4-1	3081	1563	0.65	5.91	(-43.3, -26.8, -18.5)
	m 5-1	2708	1465	0.64	5.54	(-41.5, -26.9, -8.9)
	m 6-1	3831	2029	0.58	5.66	(-36.7, -19.0, -11.5)
	m 7-1	1922	1071	0.7	5.38	(-31.8, -26.9, -20.5)
	m 8-1	2189	1159	0.7	5.66	(-33.6, -27.5, -21.1)
	m 9-1	2284	1328	0.63	5.16	(-28.6, -29.6, -23.5)
	m 10-1	2162	1212	0.67	5.35	(-42.1, -31.1, -7.4)
2AHT-G1	m 1-1	596	423	0.81	4.22	(-24.6, -33.9, -21.1)
	m 2-1	777	494	0.83	4.72	(-23.6, -33.9, -20.8)
	m 3-1	1124	729	0.72	4.62	(-21.6, -30.2, -18.9)
	m 4-1	973	666	0.71	4.38	(-21.3, -31.3, -21.5)
	m 5-1	649	436	0.83	4.46	(-24.0, -31.3, -23.4)
	m 6-2	356	288	0.84	3.7	(-25.6, -36.1, -21.9)
	m 7-1	777	511	0.8	4.55	(-22.7, -32.9, -22.9)
	m 8-1	258	229	0.85	3.37	(-26.0, -37.5, -22.2)
	m 9-1	720	494	0.79	4.37	(-23.3, -33.3, -20.3)
	m 10-1	288	251	0.84	3.44	(-26.1, -34.0, -24.5)
	m 11-1	769	491	0.83	4.69	(-23.2, -33.4, -23.7)
	m 12-1	1048	684	0.73	4.6	(-21.5, -31.3, -19.9)
	m 13-1	821	534	0.79	4.61	(-22.8, -32.9, -22.9)
	m 14-1	413	312	0.86	3.97	(-25.3, -35.7, -21.9)
	m 15-1	388	318	0.81	3.65	(-25.5, -35.9, -21.3)
	m 16-1	905	587	0.77	4.62	(-22.3, -31.7, -22.9)
	m 17-1	763	518	0.78	4.41	(-23.1, -32.5, -21.2)
	m 18-1	401	314	0.84	3.82	(-25.9, -36.0, -21.8)
	m 19-1	354	289	0.84	3.67	(-25.4, -35.8, -21.6)
	m 20-1	605	428	0.81	4.24	(-24.2, -33.4, -23.3)
1YLG-G2	m 2-2	594	477	0.72	3.73	(-22.9, -37.0, -23.2)
	m 4-2	622	452	0.78	4.13	(-22.7, -35.2, -22.6)
	m 7-2	640	464	0.77	4.14	(-21.0, -39.8, -22.6)
	m 9-2	642	493	0.73	3.91	(-20.4, -35.0, -22.4)
	m 10-2	637	461	0.78	4.14	(-22.0, -37.9, -22.4)
	m 14-2	598	486	0.71	3.69	(-21.6, -37.9, -23.0)
	m 15-2	629	462	0.77	4.08	(-22.8, -35.1, -24.4)
	m 17-2	561	423	0.78	3.97	(-23.0, -37.3, -23.9)
	m 18-2	616	465	0.75	3.97	(-22.5, -35.7, -23.7)
	m 19-2	537	391	0.82	4.11	(-23.0, -36.2, -26.2)
	m 20-3	605	458	0.76	3.96	(-22.1, -33.1, -23.8)
2M57-G1	m 1-1	483	410	0.73	3.6	(-28.7, -25.2, -40.4)
	m 4-1	201	206	0.8	2.92	(-31.6, -27.1, -46.9)
	m 6-1	202	210	0.79	2.89	(-31.4, -26.8, -46.7)
	m 7-1	484	400	0.74	3.62	(-30.6, -27.6, -41.9)
	m 9-1	561	456	0.72	3.69	(-29.5, -26.9, -43.7)
	m 12-1	334	305	0.76	3.28	(-30.2, -26.2, -40.2)
	m 14-1	359	345	0.71	3.11	(-30.9, -23.9, -46.1)
	m 19-1	284	266	0.78	3.2	(-30.5, -26.4, -44.4)
6U79-G1	m 1-1	1999	1208	0.64	4.96	(-19.2, -35.5, -22.7)
	m 2-1	1863	1138	0.64	4.91	(-21.3, -33.6, -22.1)
	m 3-1	2394	1487	0.58	4.83	(-19.4, -31.7, -22.4)
	m 4-1	2583	1371	0.66	5.65	(-20.3, -33.8, -21.9)
	m 5-1	1244	816	0.69	4.57	(-20.1, -39.9, -23.3)
	m 6-1	3103	1708	0.6	5.45	(-20.1, -30.1, -22.3)
	m 7-1	1943	1172	0.64	4.97	(-22.2, -32.8, -23.4)
	m 8-1	2011	1208	0.64	4.99	(-19.1, -33.9, -23.4)
	m 9-1	2541	1544	0.58	4.94	(-19.4, -33.0, -22.1)
	m 10-1	1950	1224	0.62	4.78	(-22.0, -33.4, -22.8)
1QC8-G1	m 1-1	662	463	0.79	4.29	(-23.9, -34.2, -23.7)
	m 3-1	856	533	0.82	4.82	(-24.8, -34.9, -22.3)
	m 7-1	1186	872	0.62	4.08	(-23.0, -25.3, -20.4)
	m 9-1	1254	802	0.7	4.69	(-21.5, -31.0, -22.6)
	m 11-1	526	388	0.81	4.06	(-22.7, -35.2, -22.3)
	m 17-1	539	381	0.84	4.23	(-23.8, -32.9, -23.4)
	m 18-1	762	584	0.69	3.91	(-26.1, -33.1, -21.6)
	m 21-1	1529	946	0.68	4.85	(-22.3, -28.3, -22.0)
	m 23-1	383	285	0.89	4.03	(-27.0, -37.2, -24.7)
	m 24-1	806	566	0.74	4.27	(-22.7, -31.9, -23.0)
	m 25-1	529	404	0.78	3.92	(-25.2, -33.6, -23.6)
2HNS-G1	m 1-1	348	278	0.86	3.75	(-25.6, -32.8, -21.7)
	m 2-1	263	223	0.89	3.53	(-24.1, -33.8, -20.2)
	m 3-1	373	296	0.84	3.77	(-25.1, -32.5, -23.8)
	m 4-1	950	658	0.71	4.33	(-21.6, -28.3, -23.3)
	m 5-1	1001	697	0.69	4.31	(-21.9, -24.7, -19.1)
	m 6-1	260	232	0.85	3.35	(-25.8, -33.3, -21.9)
	m 10-1	501	373	0.82	4.03	(-24.4, -32.0, -20.3)
	m 11-1	441	338	0.83	3.91	(-22.8, -32.1, -20.8)
	m 12-1	378	296	0.85	3.83	(-25.9, -32.8, -18.8)
	m 15-1	720	510	0.76	4.23	(-22.1, -32.1, -21.4)
	m 18-1	452	346	0.82	3.91	(-24.9, -33.5, -21.5)
	m 19-1	428	318	0.86	4.03	(-25.0, -32.8, -21.5)
	m 20-1	370	286	0.87	3.87	(-25.1, -32.5, -19.3)
1N66-G1	m 1-1	352	281	0.86	3.75	(-59.6, -86.7, -64.6)
	m 2-1	462	373	0.77	3.71	(-55.8, -86.0, -64.9)
	m 3-2	515	398	0.78	3.88	(-56.3, -86.0, -64.2)
	m 5-1	419	351	0.77	3.58	(-57.0, -85.8, -64.4)
	m 6-1	428	341	0.8	3.76	(-57.6, -86.2, -64.6)
	m 7-1	346	290	0.82	3.58	(-57.6, -86.6, -64.7)
	m 9-1	724	567	0.69	3.83	(-56.3, -84.5, -63.0)
	m 10-1	519	405	0.77	3.84	(-56.4, -86.1, -63.6)
	m 11-1	745	569	0.7	3.92	(-56.1, -84.3, -63.0)
	m 12-1	484	380	0.78	3.81	(-56.6, -85.9, -64.2)
	m 13-1	237	218	0.85	3.25	(-57.8, -86.6, -65.4)
	m 14-2	369	294	0.84	3.76	(-58.5, -86.5, -64.8)
	m 15-2	282	242	0.86	3.5	(-60.5, -87.8, -64.2)
	m 19-1	800	585	0.71	4.1	(-53.8, -84.3, -63.3)
	m 20-1	513	401	0.77	3.83	(-56.3, -86.2, -64.7)
1P5O-G1	m 1-1	675	540	0.69	3.75	(-51.4, -42.9, -24.3)
	m 2-2	926	651	0.7	4.26	(-53.7, -41.2, -22.5)
	m 3-2	610	488	0.71	3.47	(-49.2, -44.5, -23.4)
	m 4-1	715	509	0.76	4.21	(-48.8, -44.3, -25.4)
	m 5-2	692	525	0.72	3.95	(-56.1, -44.1, -24.4)
	m 6-2	800	605	0.69	3.96	(-49.2, -39.0, -14.1)
	m 7-1	670	504	0.73	3.98	(-50.3, -44.5, -28.0)
	m 8-2	733	595	0.66	3.7	(-52.2, -41.6, -24.7)
	m 9-2	930	627	0.73	4.45	(-51.6, -44.5, -24.5)
	m 10-2	786	607	0.68	3.88	(-52.0, -43.9, -27.0)
	m 11-2	459	362	0.79	3.8	(-53.8, -43.9, -27.9)
	m 12-2	649	485	0.75	4.01	(-51.4, -40.9, -28.3)
6HAG-G2	m 1-2	691	469	0.8	4.41	(-41.6, -33.3, -30.4)
	m 2-2	930	638	0.72	4.37	(-36.8, -30.0, -28.5)
	m 3-3	1105	698	0.74	4.74	(-39.7, -30.4, -28.5)
	m 4-2	784	525	0.78	4.47	(-40.2, -34.1, -27.3)
	m 5-2	926	657	0.7	4.23	(-39.2, -31.9, -29.8)
	m 6-2	1094	746	0.69	4.39	(-38.2, -30.3, -26.0)
	m 7-3	986	660	0.72	4.48	(-39.9, -28.4, -28.2)
	m 8-2	1361	835	0.71	4.89	(-33.8, -30.2, -24.2)
	m 9-3	839	574	0.75	4.38	(-38.6, -30.8, -26.6)
	m 10-2	1666	1039	0.62	4.57	(-38.9, -22.7, -26.5)
484D-G1	m 1-1	828	576	0.74	4.31	(-31.7, -25.1, -27.8)
	m 2-1	1125	639	0.82	5.27	(-32.6, -21.0, -26.1)
	m 3-1	1082	696	0.73	4.66	(-29.8, -19.7, -28.3)
	m 4-1	660	457	0.8	4.32	(-34.7, -24.5, -31.0)
	m 5-1	823	575	0.74	4.29	(-30.7, -25.5, -27.1)
	m 6-1	863	593	0.74	4.36	(-30.0, -27.5, -28.9)
	m 7-1	1021	591	0.83	5.18	(-34.9, -19.9, -28.5)
	m 9-1	1018	631	0.77	4.84	(-34.0, -20.7, -28.2)
	m 10-1	1302	750	0.77	5.21	(-32.5, -20.6, -31.0)
	m 11-1	1572	987	0.66	4.78	(-32.2, -20.2, -24.8)
	m 12-1	833	508	0.84	4.92	(-31.4, -25.6, -31.7)
	m 13-1	744	449	0.88	4.96	(-33.6, -24.7, -28.5)
	m 14-1	906	564	0.8	4.82	(-29.8, -26.7, -30.1)
	m 15-1	811	496	0.85	4.91	(-35.2, -21.1, -29.3)
	m 16-1	635	436	0.82	4.36	(-33.7, -27.2, -27.8)
	m 17-1	1362	797	0.75	5.13	(-30.1, -20.8, -29.0)
	m 18-1	1068	703	0.72	4.55	(-27.9, -23.4, -27.2)
	m 19-1	376	323	0.78	3.49	(-30.9, -28.1, -32.0)
	m 20-1	462	342	0.84	4.04	(-35.0, -26.6, -28.3)
	m 21-1	865	582	0.75	4.45	(-34.6, -23.6, -29.3)
	m 22-1	705	470	0.81	4.5	(-35.7, -23.3, -30.2)
5KH8-G3	m 14-2	296	250	0.86	3.54	(-31.5, -34.0, -37.7)
	m 18-2	286	268	0.78	3.19	(-30.5, -36.3, -36.5)
	m 19-2	378	314	0.8	3.61	(-27.7, -33.6, -38.5)
1A51-G1	m 1-1	712	598	0.64	3.57	(-26.2, -43.5, -29.3)
	m 2-1	526	416	0.76	3.79	(-27.2, -44.3, -29.5)
	m 3-1	656	494	0.74	3.98	(-26.9, -46.0, -28.6)
	m 4-1	499	403	0.75	3.71	(-24.6, -46.5, -28.8)
	m 6-1	458	100	0.72	3.43	(-27.9, -43.4, -30.7)
	m 7-1	518	434	0.72	3.57	(-24.7, -43.0, -31.3)
	m 8-1	308	277	0.8	3.33	(-25.9, -45.4, -32.3
	m 9-1	533	457	0.69	3.49	(-25.5, -40.9, -32.1)
2KDQ-G1	m 1-1	1236	845	0.66	4.38	(-35.0, -24.2, -23.3)
	m 2-1	1958	1203	0.63	4.88	(-34.9, -22.4, -20.2)
	m 3-1	1820	1203	0.6	4.54	(-31.3, -21.1, -21.8)
	m 4-1	1654	1030	0.66	4.82	(-31.6, -23.9, -22.9)
	m 5-1	1764	1168	0.6	4.53	(-32.6, -21.0, -23.3)
	m 6-1	1908	1164	0.64	4.92	(-33.1, -23.3, -22.2)
	m 7-1	1978	1350	0.56	4.4	(-33.1, -21.7, -20.8)
	m 8-1	1972	1187	0.64	4.98	(-33.7, -20.0, -21.4)
	m 9-1	1872	1259	0.58	4.46	(-33.3, -20.4, -20.6)
	m 10-1	1875	1159	0.63	4.85	(-34.3, -22.6, -22.9)
1JTJ-G2	m 2-1	585	428	0.79	4.09	(-20.5, -28.7, -27.1)
	m 3-1	597	476	0.72	3.75	(-23.7, -29.5, -25.7)
	m 7-1	519	400	0.78	3.89	(-23.8, -29.4, -26.5)
	m 9-1	627	490	0.72	3.84	(-24.4, -28.5, -26.3)
	m 10-1	605	490	0.71	3.7	(-24.5, -28.6, -25.5)
	m 12-1	548	433	0.75	3.79	(-21.9, -28.9, -27.1)
	m 14-1	445	336	0.84	3.97	(-23.4, -30.3, -28.3)
	m 15-1	397	323	0.81	3.68	(-23.8, -26.2, -25.3)
	m 16-1	652	499	0.73	3.91	(-20.6, -26.9, -24.3)
	m 17-1	713	556	0.69	3.84	(-20.3, -26.9, -24.7)
	m 19-1	441	340	0.82	3.89	(-25.5, -31.0, -27.4)
2LDT-G2	m 4-2	393	329	0.79	3.57	(-38.3, -34.2, -26.5)
	m 5-2	599	435	0.79	4.12	(-36.0, -34.3, -26.7)
	m 8-2	502	409	0.75	3.67	(-37.0, -32.7, -24.9)
	m 9-2	227	225	0.8	3.02	(-39.7, -35.0, -27.9)
	m 11-2	339	292	0.8	3.48	(-41.4, -34.3, -26.9)
	m 13-2	463	411	0.7	3.38	(-38.9, -33.6, -25.9)
2N8V-G3	m 2-3	1227	735	0.75	5	(-42.9, -38.6, -46.6)
	m 5-2	1139	699	0.75	4.89	(-41.8, -36.3, -45.5)
	m 6-3	1146	700	0.76	4.91	(-41.4, -37.3, -39.4)
	m 7-2	949	566	0.82	5.03	(-45.5, -34.3, -48.7)
1MNX-G2	m 4-2	470	403	0.72	3.5	(-43.0, -28.5, -35.9)
	m 5-2	260	239	0.82	3.26	(-43.7, -32.3, -35.2)
	m 7-2	324	265	0.86	3.66	(-41.4, -31.5, -37.8)
	m 8-2	367	325	0.76	3.39	(-43.2, -30.7, -36.3)
	m 10-2	527	444	0.71	3.56	(-40.1, -30.0, -33.9)
	m 13-2	271	244	0.83	3.33	(-43.3, -32.4, -37.3)
2FEY-G1	m 1-1	806	572	0.73	4.23	(-24.3, -47.2, -23.8)
	m 2-1	1410	1026	0.59	4.12	(-22.2, -41.3, -20.3)
	m 3-1	679	543	0.69	3.75	(-26.2, -49.0, -24.1)
	m 4-1	524	380	0.83	4.13	(-24.9, -53.5, -23.6)
	m 5-1	683	542	0.69	3.77	(-23.9, -46.4, -24.8)
	m 6-1	1507	1061	0.6	4.26	(-23.1, -40.9, -20.6)
	m 7-1	460	378	0.76	3.65	(-25.1, -51.6, -24.4)
	m 8-1	417	331	0.81	3.77	(-26.0, -50.1, -25.8)
	m 9-1	611	415	0.84	4.41	(-27.0, -51.7, -22.7)
	m 10-1	629	456	0.78	4.13	(-27.0, -47.7, -23.6)
2L94-G1	m 1-1	675	473	0.79	4.27	(-44.3, -23.6, -23.4)
	m 2-1	1076	687	0.74	4.69	(-42.6, -22.1, -21.4
	m 3-1	970	642	0.74	4.53	(-44.3, -21.9, -21.5)
	m 4-1	962	668	0.7	4.31	(-42.7, -22.7, -21.6)
	m 5-1	863	565	0.78	4.58	(-42.5, -24.4, -22.4)
	m 6-1	305	254	0.86	3.6	(-45.4, -25.8, -24.2)
	m 7-1	310	251	0.88	3.69	(-44.8, -25.5, -26.5)
	m 8-1	847	535	0.81	4.75	(-41.7, -24.3, -23.2)
	m 9-1	590	425	0.8	4.16	(-42.8, -23.5, -24.6)
	m 10-1	310	264	0.84	3.52	(-47.0, -25.4, -25.9)
6IZP-G2	m 1-2	860	661	0.66	3.9	(-26.4, -26.0, -33.2)
	m 2-2	367	320	0.77	3.44	(-29.8, -30.8, -42.3)
	m 3-1	1253	878	0.64	4.28	(-23.9, -25.2, -33.1)
	m 4-1	344	279	0.85	3.69	(-28.8, -34.2, -40.3)
	m 5-1	700	568	0.67	3.7	(-24.5, -32.5, -37.3)
	m 6-2	899	690	0.65	3.9	(-23.4, -26.7, -34.9)
	m 7-2	681	583	0.64	3.5	(-28.5, -26.5, -32.7)
	m 9-1	820	667	0.63	3.69	(-25.1, -28.6, -36.7)
2LC8-G6	m 3-1	736	512	0.77	4.3	(-42.4, -38.4, -29.0)
	m 4-1	285	254	0.82	3.36	(-44.8, -38.2, -31.1)
	m 5-1	396	327	0.8	3.62	(-44.0, -37.1, -26.6)
	m 6-1	342	275	0.86	3.72	(-46.3, -38.0, -29.5)
	m 8-1	459	349	0.82	3.94	(-49.0, -34.4, -27.0)
	m 10-1	441	331	0.84	3.99	(-47.8, -35.7, -29.5)
1S9S-G3	m 1-3	1090	657	0.78	4.97	(-46.8, -35.5, -58.2)
	m 2-3	1160	714	0.75	4.87	(-46.4, -39.4, -57.4)
	m 3-3	934	598	0.77	4.68	(-30.5, -35.6, -64.5)
	m 7-3	764	489	0.83	4.68	(-42.8, -36.9, -64.7)
	m 9-4	1275	773	0.74	4.95	(-31.3, -35.6, -66.5)
	m 10-4	1076	663	0.77	4.86	(-30.7, -39.5, -64.4)
	m 11-4	1356	803	0.74	5.06	(-25.6, -40.5, -63.8)
	m 12-5	863	562	0.78	4.61	(-44.4, -35.6, -57.0)
	m 13-4	975	613	0.78	4.77	(-47.6, -38.1, -64.1)
	m 15-4	1005	628	0.77	4.8	(-33.3, -36.4, -65.3)
	m 16-4	1103	704	0.73	4.7	(-46.7, -32.6, -59.8)
	m 17-7	1103	681	0.76	4.86	(-29.8, -37.5, -67.5)
	m 18-6	1251	742	0.76	5.05	(-34.0, -39.5, -63.6)
	m 19-6	961	593	0.79	4.86	(-37.4, -39.5, -60.7)
	m 20-3	477	325	0.91	4.39	(-35.5, -35.4, -66.9)
2M24-G1	m 1-1	485	372	0.8	3.91	(-35.7, -26.9, -23.2)
	m 2-1	727	525	0.74	4.15	(-36.6, -24.2, -17.9)
	m 3-1	579	418	0.8	4.15	(-34.8, -25.6, -23.0)
	m 4-1	1001	680	0.71	4.41	(-37.1, -22.6, -18.0)
	m 5-1	598	436	0.79	4.11	(-36.1, -25.9, -23.0)
	m 6-1	446	342	0.82	3.91	(-35.3, -27.1, -24.7)
	m 7-1	806	598	0.7	4.04	(-33.9, -23.9, -19.7)
	m 8-1	480	373	0.79	3.86	(-35.6, -24.9, -26.5)
	m 9-1	722	490	0.79	4.42	(-35.3, -22.9, -22.2)
	m 10-1	482	369	0.81	3.92	(-33.2, -28.6, -28.0)
	m 11-1	409	305	0.87	4.02	(-34.7, -27.2, -26.6)
	m 12-1	356	312	0.78	3.42	(-37.6, -25.2, -24.9)
	m 14-1	774	482	0.84	4.81	(-34.2, -26.7, -25.4)
	m 15-1	1173	853	0.63	4.12	(-36.3, -21.3, -14.2)
	m 16-1	415	313	0.86	3.98	(-34.1, -28.6, -26.3)
	m 17-1	1115	770	0.67	4.34	(-34.3, -18.7, -17.8)
	m 18-1	682	441	0.85	4.63	(-33.5, -27.0, -26.0)
	m 19-1	588	432	0.79	4.08	(-34.3, -27.1, -23.7)
	m 20-1	527	394	0.84	4.35	(-34.9, -22.8, -25.5)
1OSW-G1	m 1-1	485	393	0.76	3.7	(-36.3, -27.0, -21.6)
	m 2-1	992	655	0.73	4.54	(-33.4, -20.4, -17.6)
	m 3-1	586	437	0.77	4.02	(-31.9, -24.7, -21.2)
	m 4-1	794	513	0.81	4.63	(-35.1, -26.9, -19.2)
	m 5-1	533	417	0.76	3.83	(-33.2, -25.7, -21.0)
	m 6-1	487	378	0.79	3.86	(-36.5, -25.9, -23.3)
	m 7-1	213	216	0.84	3.2	(-36.5, -28.8, -24.3)
	m 8-1	615	427	0.77	4.13	(-34.4, -25.4, -25.0)
	m 9-1	387	340	0.75	3.41	(-35.4, -27.6, -22.1)
	m 10-1	1266	726	0.78	5.23	(-35.4, -27.6, -22.1)
	m 11-1	533	460	0.71	3.6	(-34.5, -24.6, -22.8)
	m 12-1	837	590	0.73	4.25	(-34.3, -24.3, -17.0)
	m 13-1	408	321	0.83	3.81	(-32.4, -27.6, -22.7)
	m 14-1	629	483	0.73	3.9	(-34.2, -25.1, -22.0)
	m 15-1	958	652	0.72	4.41	(-35.6, -26.5, -17.1)
	m 16-1	725	558	0.7	3.89	(-36.3, -24.5, -16.8)
	m 17-1	115	733	0.71	4.56	(-34.8, -22.5, -15.7)
	m 18-1	430	362	0.76	3.56	(-36.2, -27.5, -20.7)
	m 19-1	258	236	0.83	3.27	(-36.7, -28.3, -24.8)
	m 20-1	455	359	0.8	3.8	(-35.9, -27.3, -23.0)
	m 21-1	1011	683	0.71	4.43	(-33.0, -24.7, -18.7)
	m 22-1	550	413	0.79	3.99	(-35.8, -27.6, -21.1)
	m 23-1	207	212	0.8	2.92	(-34.3, -28.4, -25.2)
1JO7-G2	m 2-1	306	246	0.89	3.73	(-27.7, -41.8, -21.6)
	m 4-1	257	227	0.86	3.39	(-27.3, -41.4, -22.0)
	m 5-1	499	357	0.85	4.19	(-26.5, -41.1, -19.3)
	m 7-1	454	332	0.86	4.1	(-27.0, -41.1, -21.0)
	m 8-1	466	336	0.86	4.15	(-26.6, -40.7, -20.4)
	m 10-1	289	241	0.88	3.59	(-28.0, -42.1, -20.9)
	m 11-1	490	357	0.84	4.11	(-26.2, -41.1, -20.1)
	m 12-1	442	335	0.84	3.95	(-25.0, -40.2, -19.8)
	m 13-1	336	270	0.86	3.73	(-27.4, -41.8, -21.5)
	m 14-1	370	289	0.86	3.84	(-27.5, -40.8, -21.4)
	m 15-1	434	337	0.82	3.85	(-27.3, -40.9, -20.3)
	m 17-1	775	517	0.79	4.49	(-24.3, -38.7, -18.3)
	m 20-1	1192	755	0.72	4.73	(-25.2, -36.2, -18.8)
	m 22-1	280	245	0.84	3.42	(-27.5, -42.0, -23.7)
6GBM-G1	m 1-1	542	386	0.83	4.2	(-31.0, -30.2, -27.2)
	m 2-1	866	562	0.78	4.62	(-29.1, -28.1, -25.4)
	m 3-1	694	516	0.73	4.03	(-25.8, -28.1, -25.9)
	m 4-1	719	528	0.73	4.08	(-29.3, -29.4, -24.8)
	m 5-1	817	539	0.78	4.55	(-26.7, -29.5, -25.4)
	m 6-1	835	569	0.75	4.4	(-28.7, -30.1, -23.0)
	m 7-1	756	551	0.73	4.12	(-28.4, -29.8, -25.9)
	m 8-1	412	330	0.81	3.74	(-27.7, -29.9, -27.4)
	m 9-1	510	413	0.75	3.7	(-29.7, -28.1, -27.4)
	m 10-1	851	548	0.79	4.66	(-28.6, -30.0, -25.8)
	m 11-1	836	583	0.74	4.3	(-28.2, -26.8, -28.0)
	m 12-1	822	581	0.73	4.24	(-35.0, -33.0, -33.0)
	m 13-1	745	553	0.72	4.04	(-28.5, -30.0, -22.6)
	m 14-1	915	594	0.77	4.62	(-28.3, -29.6, -25.4)
	m 15-1	776	537	0.76	4.33	(-27.1, -31.5, -25.6)
	m 16-1	864	561	0.78	4.62	(-28.7, -25.8, -25.6)
	m 17-1	940	605	0.77	4.66	(-28.5, -27.9, -25.7)
	m 18-1	880	565	0.79	4.67	(-28.5, -25.7, -25.2)
	m 19-1	866	586	0.75	4.43	(-30.1, -27.9, -25.0)
	m 20-1	875	586	0.75	4.47	(-28.4, -29.2, -25.4)
17RA-G1	m 1-1	831	545	0.78	4.57	(-23.6, -32.3, -19.3)
	m 3-1	631	451	0.79	4.2	(-24.3, -33.4, -19.8)
	m 4-1	851	568	0.76	4.49	(-24.9, -32.5, -20.0)
	m 6-1	687	480	0.78	4.29	(-23.5, -34.9, -22.0)
	m 9-2	402	302	0.87	3.99	(-25.2, -31.4, -24.0)
	m 11-1	735	499	0.79	4.42	(-25.6, -31.2, -20.6)
	m 12-1	885	581	0.77	4.57	(-25.9, -32.1, -20.7)
1M5L-G4	m 6-2	198	188	0.87	3.16	(-31.3, -50.2, -25.1)
	m 12-2	440	354	0.79	3.72	(-27.4, -48.1, -23.6)
	m 15-2	567	434	0.76	3.92	(-29.8, -38.8, -31.7)
2GV3-G1	m 2-1	212	198	0.87	3.21	(-26.1, -32.0, -22.7)
	m 6-1	404	326	0.81	3.71	(-24.7, -30.8, -24.8)
	m 7-1	556	388	0.84	4.3	(-24.3, -31.4, -20.9)
	m 10-1	411	342	0.78	3.6	(-24.8, -32.0, -23.5)
	m 11-1	521	374	0.84	4.17	(-24.4, -32.2, -23.1)
	m 12-1	883	642	0.69	4.12	(-23.4, -25.5, -22.9)
	m 14-1	330	270	0.85	3.65	(-25.5, -33.4, -21.5)
	m 15-1	459	348	0.83	3.95	(-24.0, -30.1, -21.8)
2HUA-G1	m 1-1	322	308	0.74	3.13	(-44.8, -30.3, -25.4)
	m 2-1	277	262	0.78	3.16	(-45.0, -28.9, -25.9)
	m 3-1	247	245	0.78	3.02	(-45.0, -29.1, -26.0)
	m 4-1	302	270	0.8	3.34	(-47.0, -28.7, -26.3)
	m 5-1	335	312	0.75	3.21	(-44.7, -28.2, -25.3)
	m 6-1	620	443	0.79	4.19	(-43.6, -27.3, -25.1)
	m 7-1	268	255	0.79	3.15	(-47.1, -29.1, -26.6)
	m 8-1	769	602	0.67	3.83	(-42.8, -26.2, -21.8)
	m 9-1	281	276	0.75	3.05	(-44.7, -29.1, -26.0)
	m 10-1	753	587	0.68	3.85	(-45.0, -25.6, -21.8)
	m 11-1	701	588	0.65	3.57	(-45.7, -25.5, -22.0)
1YLG-G1	m 1-1	1589	1153	0.57	4.13	(-21.1, -25.9, -19.8)
	m 2-1	841	561	0.77	4.49	(-24.0, -35.4, -21.8)
	m 4-1	1190	775	0.7	4.61	(-22.3, -33.2, -20.1)
	m 5-1	2003	1254	0.61	4.79	(-22.6, -24.0, -20.8)
	m 6-1	1792	1246	0.57	4.31	(-20.9, -24.8, -21.9)
	m 7-1	1051	728	0.69	4.33	(-21.2, -35.7, -20.7)
	m 8-1	2032	1326	0.58	4.59	(-22.2, -22.6, -18.5)
	m 9-1	965	668	0.71	4.33	(-20.9, -33.2, -20.2)
	m 10-1	1286	847	0.67	4.55	(-23.0, -31.3, -21.0)
	m 11-1	1751	1190	0.59	4.41	(-21.1, -26.5, -20.0)
	m 12-1	1859	1236	0.59	4.51	(-19.9, -25.8, -22.4)
	m 13-1	2051	1341	0.58	4.59	(-19.8, -20.9, -20.8)
	m 14-1	1073	727	0.7	4.43	(-23.0, -33.9, -19.1)
	m 15-1	1216	773	0.71	4.72	(-22.2, -33.3, -21.8)
	m 16-1	1847	1100	0.66	5.04	(-22.9, -25.2, -20.8)
	m 17-1	1133	724	0.73	4.69	(-22.5, -35.1, -19.5)
	m 18-1	884	572	0.78	4.63	(-21.7, -34.6, -22.4)
	m 19-1	1406	903	0.67	4.67	(-20.7, -31.7, -21.8)
	m 20-1	812	526	0.8	4.63	(-20.8, -32.9, -22.8)
1IKD-G1	m 1-1	782	535	0.77	4.38	(-26.4, -25.1, -27.0)
	m 4-1	496	415	0.73	3.58	(-29.6, -24.3, -31.2)
	m 7-1	380	322	0.79	3.53	(-26.0, -26.2, -32.5)
	m 9-1	597	407	0.84	4.4	(-31.3, -25.8, -31.7)
	m 11-2	458	345	0.83	3.98	(-25.2, -27.5, -30.6)
	m 13-1	659	475	0.77	4.16	(-25.0, -26.1, -34.6)
	m 17-1	1075	669	0.76	4.81	(-30.3, -22.6, -26.2)
	m 18-1	696	553	0.69	3.77	(-25.8, -24.2, -28.0)
	m 20-1	909	564	0.8	4.83	(-30.1, -26.8, -28.9)
	m 21-1	844	571	0.76	4.43	(-30.2, -22.3, -27.1)
	m 23-1	388	319	0.8	3.64	(-23.8, -27.8, -35.9)
	m 24-1	1245	759	0.74	4.92	(-24.3, -24.6, -26.0)
	m 25-1	890	628	0.71	4.25	(-24.3, -24.8, -28.7)
	m 27-1	681	456	0.82	4.48	(-28.5, -25.8, -31.7)
	m 29-1	582	405	0.83	4.31	(-25.9, -27.2, -30.1)
2N7M-G1	m 1-1	5942	3064	0.52	5.82	(-37.8, -41.6, -37.8)
	m 2-2	5387	2751	0.54	5.87	(-44.6, -43.1, -38.0)
	m 3-2	6269	3141	0.52	5.99	(-45.5, -42.3, -34.5)
	m 4-2	4670	2419	0.56	5.79	(-44.8, -43.8, -39.0)
	m 5-1	5235	2756	0.53	5.7	(-37.3, -38.6, -35.8)
	m 6-3	3897	1861	0.64	6.28	(-47.5, -43.7, -36.2)
	m 7-2	4654	2350	0.57	5.94	(-44.4, -42.1, -36.6)
	m 8-1	4837	2475	0.56	5.86	(-35.6, -40.6, -38.4)
	m 9-2	5686	2499	0.62	6.82	(-43.3, -40.2, -37.8)
	m 10-1	5746	2857	0.54	6.03	(-38.1, -39.1, -35.8)
2FDT-G2	m 1-2	584	411	0.82	4.26	(-35.3, -30.3, -30.0)
	m 2-2	943	602	0.77	4.69	(-32.2, -31.9, -24.4)
	m 3-2	617	436	0.8	4.24	(-34.6, -29.6, -28.1)
	m 4-2	767	518	0.78	4.43	(-35.3, -26.4, -30.1)
	m 5-2	982	693	0.69	4.25	(-29.6, -24.2, -29.5)
	m 6-2	503	364	0.84	4.14	(-35.4, -30.1, -26.9)
	m 7-2	1014	649	0.75	4.68	(-29.7, -31.0, -23.2)
	m 8-2	590	417	0.81	4.24	(-38.3, -28.0, -26.5)
	m 9-2	654	447	0.81	4.38	(-36.8, -25.6, -30.7)
	m 10-2	697	500	0.76	4.81	(-35.9, -29.1, -24.6)
	m 11-2	1325	817	0.71	4.86	(-27.5, -30.5, -28.0)
1AUD-G3	m 2-2	315	302	0.74	3.12	(-32.0, -30.6, -30.6)
	m 4-3	393	322	0.81	3.66	(-31.3, -28.9, -29.2)
	m 6-3	257	261	0.75	2.95	(-29.9, -31.6, -30.7)
	m 7-3	471	381	0.77	3.7	(-31.2, -31.7, -28.2)
	m 8-2	261	236	0.83	3.3	(-31.8, -30.7, -31.2)
	m 11-3	293	267	0.8	3.28	(-30.2, -33.0, -32.9)
	m 16-3	320	272	0.83	3.52	(-33.3, -32.4, -32.8)
	m 17-2	322	270	0.84	3.57	(-29.5, -30.8, -28.7)
	m 18-3	321	290	0.78	3.31	(-28.5, -32.3, -32.6)
	m 19-3	372	328	0.76	3.4	(-28.4, -30.5, -30.1)
	m 22-2	293	268	0.79	3.27	(-29.0, -31.7, -30.7)
	m 23-3	350	324	0.74	3.24	(-31.9, -28.5, -27.9)
	m 24-2	375	307	0.82	3.66	(-31.0, -30.8, -29.8)
	m 25-3	292	261	0.82	3.35	(-32.1, -31.0, -32.8)
	m 27-3	434	350	0.79	3.72	(-31.5, -29.7, -30.5)
	m 28-3	298	263	0.82	3.39	(-30.9, -28.9, -32.0)
	m 29-3	398	320	0.82	3.73	(-29.7, -33.3, -29.2)
	m 30-2	439	382	0.73	3.44	(-30.4, -30.0, -30.9)
1BVJ-G1	m 3-1	326	271	0.84	3.6	(-24.2, -32.6, -26.5)
	m 5-1	978	690	0.69	4.25	(-20.1, -25.7, -23.9)
	m 6-1	1245	748	0.75	4.99	(-21.2, -26.6, -22.5)
	m 7-1	912	556	0.82	4.92	(-22.7, -26.2, -23.2)
	m 8-1	564	365	0.9	4.62	(-23.6, -27.8, -25.2)
	m 9-1	671	490	0.76	4.1	(-23.0, -27.8, -25.5)
	m 10-1	543	412	0.78	3.95	(-24.2, -30.0, -26.6)
	m 11-1	524	358	0.88	4.38	(-23.9, -31.0, -25.0)
	m 12-1	689	526	0.72	3.92	(-20.2, -29.5, -23.4)
	m 13-1	422	301	0.9	4.2	(-23.9, -28.2, -27.7)
	m 14-1	1074	665	0.76	4.84	(-21.7, -25.5, -21.8)
	m 16-1	835	560	0.76	4.47	(-22.2, -27.3, -22.3)
	m 17-1	649	452	0.8	4.3	(-22.3, -29.2, -23.1)
	m 18-1	757	545	0.74	4.16	(-22.1, -26.0, -23.0)
	m 19-1	1062	699	0.72	4.56	(-21.0, -23.9, -24.3)
	m 20-1	918	586	0.78	4.7	(-22.2, -26.3, -22.1)
2LWK-G1	m 1-1	2554	1349	0.67	5.68	(-23.9, -26.6, -22.6)
	m 2-1	2604	1354	0.68	5.77	(-24.9, -27.9, -20.9)
	m 3-1	2508	1338	0.67	5.62	(-24.9, -25.4, -20.8)
	m 4-1	2388	1269	0.68	5.64	(-23.4, -26.3, -22.6)
	m 6-1	2460	1237	0.69	5.8	(-22.9, -28.2, -19.9)
	m 7-1	2343	1219	0.7	5.76	(-23.9, -28.2, -21.3)
	m 8-1	2493	1285	0.69	5.82	(-21.5, -25.6, -22.0)
	m 9-1	2641	1360	0.68	5.83	(-23.6, -27.7, -19.6)
	m 12-1	2586	1323	0.69	5.86	(-21.8, -27.4, -22.8)
	m 13-1	2444	1230	0.71	5.96	(-23.7, -28.8, -22.2)
	m 14-1	2412	1258	0.69	5.75	(-21.7, -26.9, -23.1)
	m 15-1	2417	1271	0.68	5.7	(-22.3, -29.0, -20.1)
	m 16-1	2316	1240	0.68	5.6	(-22.3, -29.5, -21.8)
2KRL-G3	m 1-3	563	420	0.78	4.02	(-53.0, -40.8, -53.7)
	m 5-3	394	347	0.75	3.4	(-54.0, -44.7, -53.3)
	m 8-3	543	448	0.72	3.63	(-53.6, -42.0, -53.5)
	m 9-2	325	330	0.69	2.95	(-54.3, -41.0, -55.8)
1EI2-G1	m 1-1	1366	819	0.73	5	(-23.4, -31.0, -18.9)
	m 2-1	1362	816	0.73	5	(-23.3, -28.5, -20.7)
	m 3-1	1630	980	0.68	4.99	(-25.0, -27.3, -20.9)
	m 6-1	1140	745	0.71	4.59	(-28.2, -28.9, -22.0)
	m 7-1	1169	772	0.69	4.54	(-26.6, -30.6, -22.2)
	m 8-1	954	602	0.78	4.75	(-24.2, -31.2, -21.5)
	m 9-1	949	593	0.79	4.8	(-27.2, -27.6, -23.6)
	m 10-1	505	370	0.83	4.09	(-27.8, -31.9, -23.9)
	m 11-1	1239	827	0.67	4.49	(-25.2, -26.4, -23.2)
	m 12-1	1459	888	0.7	4.92	(-25.8, -25.1, -21.6)
	m 13-1	1119	696	0.75	4.82	(-27.2, -29.1, -23.0)
	m 14-1	1048	755	0.66	4.16	(-30.2, -30.2, -19.7)
	m 16-1	432	320	0.86	4.04	(-30.4, -28.2, -26.4)
	m 17-1	837	539	0.8	4.65	(-27.3, -30.3, -22.7)
2MTK-G2	m 1-2	2103	1215	0.65	5.19	(-26.7, -38.9, -25.8)
	m 2-3	844	612	0.71	4.14	(-25.3, -42.7, -32.2)
	m 3-1	1192	788	0.69	4.54	(-25.7, -40.4, -28.4)
	m 4-2	1737	1117	0.63	4.67	(-25.4, -39.8, -27.2)
	m 5-2	1654	1068	0.63	4.665	(-23.7, -40.4, -26.2)
	m 7-2	2057	1072	0.73	5.75	(-24.3, -41.5, -25.7)
	m 8-1	1149	856	0.62	4.02	(-27.4, -38.8, -27.2)
	m 10-2	677	483	0.77	4.2	(-27.0, -41.4, -34.1)
	m 12-2	1845	1014	0.72	5.45	(-24.0, -40.8, -25.6)
	m 13-2	902	621	0.73	4.35	(-28.7, -43.3, -29.2)
	m 16-2	1490	874	0.72	5.11	(-22.4, -41.0, -23.8)
	m 17-2	1822	1068	0.68	5.11	(-26.5, -39.7, -25.4)
	m 19-2	2006	1096	0.7	5.49	(-23.7, -39.4, -26.0)
	m 20-1	1824	1064	0.68	5.14	(-25.5, -38.4, -25.0)
	m 21-2	2142	1107	0.73	5.8	(-26.4, -39.3, -27.0)
2LUN-G1	m 1-1	358	282	0.86	3.8	(-33.0, -22.1, -35.5)
	m 5-1	1455	991	0.63	4.4	(-31.6, -19.6, -28.8)
	m 6-1	308	262	0.84	3.52	(-31.8, -21.9, -38.5)
	m 7-1	231	210	0.86	3.28	(-31.8, -24.6, -36.9)
	m 8-1	550	389	0.83	4.23	(-33.1, -24.1, -33.7)
1R7W-G2	m 1-2	369	301	0.82	3.67	(-42.4, -27.8, -24.2
	m 5-2	433	335	0.83	3.88	(-42.4, -29.0, -22.9)
	m 6-2	400	316	0.83	3.79	(-41.7, -28.2, -24.5)
	m 7-2	422	361	0.75	3.5	(-40.8, -27.2, -22.8)
	m 8-2	279	242	0.85	3.46	(-41.9, -29.8, -24.6)
	m 10-2	370	315	0.79	3.52	(-40.6, -28.6, -23.4)
	m 12-2	403	321	0.82	3.76	(-40.1, -27.5, -23.4)
	m 13-2	372	308	0.81	3.62	(-43.1, -30.1, -23.1)
	m 15-2	341	281	0.84	3.64	(-42.0, -30.9, -23.2)
	m 16-2	431	351	0.78	3.68	(-39.8, -27.4, -23.1)
	m 19-2	263	235	0.84	3.35	(-44.7, -28.9, -24.0)
	m 20-2	469	359	0.81	3.91	(-41.5, -27.7, -21.0)
1R7W-G1	m 1-1	1142	791	0.67	4.33	(-41.1, -22.0, -18.3)
	m 3-1	1413	816	0.75	5.19	(-37.4, -23.7, -20.8)
	m 4-1	957	664	0.71	4.32	(-40.7, -25.5, -21.3)
	m 5-1	1141	691	0.76	4.95	(-39.6, -25.7, -20.2)
	m 6-1	714	567	0.68	3.78	(-40.5, -23.4, -22.3)
	m 7-1	489	460	0.65	3.18	(-42.2, -25.0, -21.4)
	m 9-1	1050	708	0.71	4.45	(-39.7, -24.4, -21.4)
	m 10-1	1098	697	0.74	4.72	(-37.8, -24.0, -19.4)
	m 11-1	1159	692	0.77	5.02	(-36.6, -23.0, -21.0)
	m 14-1	1585	892	0.74	5.33	(-35.9, -23.1, -16.7)
	m 15-1	889	634	0.7	4.2	(-39.9, -26.0, -20.9)
	m 16-1	707	545	0.7	3.89	(-40.0, -23.7, -21.5)
	m 17-1	607	518	0.67	3.51	(-38.9, -25.0, -23.0)
	m 18-1	598	497	0.69	3.61	(-41.6, -26.0, -21.5)
	m 20-1	704	514	0.74	4.11	(-41.2, -26.1, -19.1)
1R2P-G1	m 1-1	417	398	0.73	3.54	(-24.9, -40.1, -26.0)
	m 2-1	459	391	0.73	3.52	(-26.0, -43.4, -24.5)
	m 3-1	949	683	0.68	4.16	(-23.8, -33.7, -23.1)
	m 5-1	380	326	0.78	3.49	(-27.5, -43.5, -24.4)
	m 6-1	515	411	0.76	3.76	(-28.1, -41.9, -24.4)
	m 8-2	534	424	0.75	3.77	(-24.4, -41.7, -26.0)
	m 9-2	352	336	0.72	3.13	(-26.0, -41.2, -26.8)
	m 10-1	306	275	0.8	3.34	(-27.2, -43.2, -26.8)
1AUD-G6	m 12-3	368	316	0.78	3.48	(-30.8, -29.0, -28.2)
	m 13-3	192	171	0.94	3.36	(-32.3, -28.6, -31.4)
	m 15-3	296	262	0.82	3.38	(-35.6, -28.8, -28.5)
1E95-G2	m 4-2	294	261	0.82	3.37	(-30.5, -37.3, -29.3)
	m 7-2	297	278	0.77	3.2	(-28.8, -34.6, -30.6)
	m 8-2	423	349	0.78	3.63	(-27.3, -34.1, -29.8)
	m 9-2	271	243	0.83	3.34	(-30.2, -37.5, -29.3)
	m 13-2	209	185	0.92	3.38	(-33.3, -35.0, -30.9)
	m 15-2	459	387	0.74	3.55	(-26.5, -33.8, -29.3)
2ESE-G1	m 1-1	1158	697	0.76	4.98	(-26.8, -22.6, -27.6)
	m 2-1	1048	653	0.76	4.81	(-27.7, -20.9, -27.4)
	m 3-1	525	359	0.88	4.38	(-28.1, -26.9, -28.0)
	m 3-2	359	276	0.88	3.9	(-29.5, -29.8, -28.5)
	m 4-1	1372	761	0.78	5.41	(-25.3, -20.7, -28.7)
	m 5-1	1292	774	0.74	5	(-27.6, -21.7, -26.7)
	m 6-1	1303	753	0.77	5.19	(-27.2, -21.9, -28.6)
	m 7-1	1282	748	0.76	5.14	(-27.7, -21.5, -24.1)
	m 8-1	1310	780	0.74	5.04	(-27.5, -21.9, -28.1)
	m 9-1	1090	693	0.74	4.72	(-27.4, -20.5, -26.2)
	m 10-1	1133	717	0.73	4.74	(-27.5, -21.1, -27.0)
	m 11-1	1156	702	0.76	4.94	(-26.6, -21.4, -26.7)
	m 12-1	663	426	0.86	4.66	(-27.5, -24.4, -27.6)
	m 13-1	1079	690	0.74	4.69	(-27.5, -19.9, -27.0)
	m 14-1	1141	723	0.73	4.73	(-27.4, -20.1, -27.3)
	m 15-1	1251	744	0.75	5.04	(-26.7, -21.0, -26.8)
	m 16-1	547	373	0.87	4.39	(-27.2, -24.7, -27.9)
	m 17-1	610	401	0.87	4.56	(-27.3, -24.0, -27.0)
	m 18-1	1308	768	0.75	5.11	(-25.7, -21.8, -27.9)
	m 19-1	547	378	0.85	4.34	(-27.9, -25.2, -27.8)
	m 20-1	881	585	0.76	4.51	(-27.1, -21.6, -27.8)
2PCV-G1	m 1-1	2267	1152	0.72	5.9	(-28.8, -33.3, -36.5)
	m 2-1	3045	1490	0.68	6.13	(-24.5, -26.9, -34.8)
	m 4-1	3986	1771	0.69	6.75	(-26.3, -23.2, -27.7)
	m 5-1	3013	1417	0.71	6.38	(-27.3, -29.5, -37.6)
	m 6-1	1988	1153	0.66	5.17	(-30.1, -31.2, -36.2)
	m 7-1	3397	1433	0.76	7.11	(-25.8, -29.1, -36.3)
	m 8-1	1704	951	0.72	5.37	(-27.0, -33.9, -41.6)
	m 10-1	2395	1272	0.68	5.65	(-30.0, -29.9, -39.0)
1FMN-G1	m 2-1	778	510	0.8	4.58	(-19.0, -40.8, -26.3)
	m 3-1	1191	750	0.72	4.76	(-21.2, -38.1, -25.7)
	m 4-1	767	509	0.8	4.52	(-23.8, -39.7, -26.6)
	m 5-1	1321	774	0.75	5.12	(-17.7, -37.5, -25.1)
1LDZ-G3	m 10-1	1202	669	0.82	5.38	(-23.0, -33.1, -22.3)
	m 14-1	971	582	0.81	5	(-28.4, -34.1, -20.9)
	m 15-1	1390	772	0.78	5.4	(-24.2, -32.1, -20.1)
	m 18-1	818	477	0.89	5.14	(-27.6, -31.8, -23.4)
	m 24-1	1149	801	0.66	4.3	(-27.3, -32.7, -17.7)
	m 25-1	1195	662	0.82	5.41	(-26.5, -34.2, -24.7)
2M57-G2	m 3-1	271	217	0.93	3.74	(-33.5, -30.0, -45.1)
	m 4-2	465	373	0.78	3.73	(-33.4, -24.9, -44.0)
	m 6-2	808	502	0.83	4.82	(-32.8, -25.5, -43.4)
	m 7-2	309	293	0.75	3.16	(-34.3, -28.9, -44.3)
	m 8-1	230	223	0.81	3.09	(-34.6, -27.7, -46.3)
	m 10-1	341	290	0.81	3.52	(-33.8, -27.9, -44.4)
	m 11-1	819	558	0.76	4.4	(-31.4, -21.8, -41.3)
	m 13-1	362	311	0.79	3.48	(-33.7, -25.5, -44.6)
	m 14-2	366	329	0.75	3.33	(-32.8, -22.3, -44.8)
	m 15-1	493	403	0.75	3.66	(-32.3, -27.3, -43.7)
	m 16-1	338	257	0.91	3.93	(-34.2, -26.5, -45.3)
	m 17-1	520	392	0.8	3.98	(-32.4, -27.7, -46.0)
1P5M-G1	m 1-1	426	336	0.81	3.8	(-42.3, -37.6, -24.8)
	m 3-1	944	666	0.7	4.25	(-44.2, -35.5, -22.6)
	m 4-1	533	424	0.75	3.77	(-43.8, -34.9, -24.5)
	m 5-1	922	653	0.7	4.23	(-41.4, -33.6, -25.2)
	m 6-1	497	377	0.8	3.95	(-45.1, -37.5, -25.0)
	m 9-1	490	354	0.85	4.14	(-41.1, -37.2, -25.0)
	m 11-1	553	387	0.84	4.28	(-40.8, -39.9, -26.0)
	m 12-1	589	410	0.83	4.31	(-41.8, -36.9, -24.5)
	m 13-1	625	441	0.8	4.24	(-40.9, -35.0, -25.1)
	m 15-1	716	545	0.71	3.94	(-41.8, -34.2, -27.4)
	m 16-1	236	205	0.9	3.45	(-43.8, -38.8, -31.0)
	m 17-1	401	319	0.82	3.76	(-41.8, -37.8, -26.6)
	m 19-1	369	289	0.86	3.82	(-42.7, -37.1, -28.1)
	m 20-1	772	522	0.78	4.43	(-43.6, -35.1, -22.0)
	m 22-1	444	349	0.81	3.82	(-41.5, -37.9, -25.7)
2KZL-G1	m 2-1	243	226	0.83	3.21	(-31.7, -28.4, -60.0)
	m 3-1	255	211	0.92	3.62	(-32.4, -27.1, -63.3)
	m 5-1	249	221	0.87	3.38	(-32.1, -26.4, -62.6)
	m 6-1	199	180	0.91	3.31	(-31.8, -29.3, -63.2)
	m 8-1	320	268	0.84	3.57	(-32.3, -27.8, -63.1)
6SDW-G1	m 1-1	576	416	0.8	4.15	(-33.5, -34.0, -32.0)
	m 2-1	937	593	0.78	4.74	(-30.6, -32.6, -32.1)
	m 3-1	766	528	0.77	4.35	(-33.3, -30.4, -30.1)
	m 4-1	456	365	0.78	3.74	(-31.6, -32.0, -29.5)
	m 5-1	596	428	0.8	4.17	(-32.3, -34.6, -28.0)
	m 7-1	607	441	0.79	4.12	(-32.5, -31.2, -30.0)
	m 8-1	554	419	0.78	3.96	(-31.7, -32.0, -31.7)
	m 9-1	707	534	0.72	3.97	(-32.3, -30.9, -29.3)
	m 10-1	514	379	0.82	4.07	(-32.5, -33.9, -27.4)
	m 11-1	497	387	0.78	3.85	(-34.4, -35.4, -25.7)
	m 12-1	716	483	0.8	4.44	(-30.8, -32.3, -30.8)
	m 13-1	572	440	0.76	3.9	(-33.8, -34.7, -27.1)
	m 14-1	597	449	0.76	3.98	(-32.7, -33.4, -29.5)
	m 15-1	810	580	0.72	4.18	(-33.0, -32.0, -29.5)
	m 16-1	732	480	0.82	4.57	(-33.2, -33.4, -31.0)
	m 17-1	902	570	0.79	4.75	(-30.4, -31.8, -28.8)
	m 18-1	755	510	0.79	4.44	(-31.8, -33.0, -29.4)
	m 19-1	465	375	0.77	3.71	(-34.3, -35.3, -29.8)
	m 20-1	517	408	0.76	3.8	(-34.1, -32.0, -29.3)
2MTK-G1	m 1-1	1811	897	0.8	6.05	(-25.8, -41.6, -27.7)
	m 2-2	1830	896	0.81	6.12	(-24.8, -42.1, -31.2)
	m 3-2	1069	531	0.95	6.04	(-30.1, -42.2, -31.2)
	m 4-3	1527	785	0.82	5.83	(-24.8, -40.8, -29.8)
	m 5-1	1820	912	0.79	5.98	(-21.7, -41.2, -27.7)
	m 6-3	1205	656	0.83	5.51	(-24.5, -43.4, -28.8)
	m 7-1	1810	891	0.81	6.09	(-22.2, -41.4, -27.8)
	m 8-2	753	522	0.77	4.32	(-30.7, -41.6, -31.5)
	m 9-1	1643	868	0.78	5.68	(-26.6, -35.9, -28.5)
	m 10-1	1781	941	0.75	5.68	(-26.2, -36.5, -30.2)
	m 11-1	4183	2204	0.57	5.69	(-24.0, -28.1, -26.9)
	m 12-1	1753	952	0.74	5.52	(-23.4, -38.3, -28.2)
	m 13-1	1268	794	0.71	4.79	(-27.4, -41.7, -28.2)
	m 14-1	4619	2266	0.59	6.11	(-21.4, -27.9, -25.4)
	m 15-1	4722	2262	0.6	6.26	(-20.7, -29.5, -28.6)
	m 16-3	811	445	0.94	5.46	(-26.5, -40.3, -28.9)
	m 17-1	1384	784	0.77	5.29	(-25.1, -41.5, -30.5)
	m 18-1	3759	1908	0.61	5.91	(-23.5, -27.1, -29.8)
	m 19-1	1996	1000	0.77	5.99	(-23.0, -41.1, -27.3)
	m 21-1	1423	810	0.76	5.27	(-26.0, -42.1, -28.5)
1QWB-G1	m 1-1	655	499	0.73	3.93	(-27.5, -21.9, -36.6)
	m 3-1	527	403	0.78	3.91	(-27.8, -26.2, -35.0)
	m 7-1	473	417	0.7	3.4	(-30.2, -23.7, -33.2)
	m 9-1	678	481	0.77	4.22	(-29.2, -21.9, -37.0)
	m 10-1	475	392	0.75	3.63	(-29.7, -22.7, -35.1)
	m 11-1	679	499	0.75	4.08	(-29.0, -21.6, -37.7)
	m 12-1	438	396	0.7	3.31	(-29.4, -23.3, -34.5)
	m 13-1	576	430	0.78	4.01	(-26.9, -24.4, -37.6)
	m 14-1	719	526	0.74	4.1	(-29.0, -21.6, -34.8
	m 15-1	464	387	0.75	3.59	(-28.4, -24.2, -36.6)
	m 16-1	575	432	0.77	3.99	(-29.3, -22.0, -35.6)
	m 17-1	309	300	0.73	3.08	(-29.8, -25.7, -36.2)
2KHY-G1	m 1-1	575	437	0.76	3.94	(-46.2, -31.8, -21.4)
	m 2-1	700	519	0.73	4.04	(-46.3, -29.4, -20.3)
	m 3-1	516	367	0.85	4.22	(-47.5, -31.4, -22.6)
	m 3-2	262	201	0.98	3.91	(-49.7, -31.8, -25.9)
	m 4-1	489	340	0.88	4.31	(-48.0, -31.1, -24.1)
	m 5-1	679	484	0.77	4.2	(-45.9, -31.1, -20.0)
	m 6-1	652	458	0.79	4.27	(-45.9, -31.1, -21.1)
	m 7-1	698	550	0.69	3.8	(-45.4, -30.4, -19.1)
	m 8-1	687	517	0.73	3.98	(-46.0, -31.3, -20.6)
	m 9-1	538	371	0.86	4.34	(-46.8, -31.3, -22.9)
	m 10-1	659	500	0.73	3.95	(-46.0, -30.3, -20.1)
1FYO-G2	m 3-1	254	236	0.82	3.22	(-25.1, -36.6, -23.4)
	m 13-1	395	323	0.81	3.66	(-24.8, -33.6, -22.5)
	m 19-1	301	243	0.89	3.7	(-24.7, -34.3, -22.2)
	m 24-1	560	395	0.83	4.25	(-23.5, -33.8, -21.9)
5LWJ-G1	m 1-1	1041	695	0.71	4.49	(-27.1, -31.2, -23.3)
	m 2-1	1117	724	0.74	4.87	(-26.3, -31.4, -22.9)
	m 3-1	1239	766	0.73	4.85	(-26.3, -30.9, -22.7)
	m 4-1	1290	799	0.72	4.84	(-27.6, -30.0, -22.9)
	m 5-1	1215	750	0.73	4.86	(-27.7, -32.1, -22.8)
	m 6-2	811	506	0.83	4.81	(-30.6, -35.3, -25.4)
	m 7-1	1313	801	0.72	4.92	(-26.4, -32.6, -23.2)
	m 8-1	856	517	0.84	4.96	(-30.7, -35.3, -25.6)
	m 9-1	308	250	0.88	3.69	(-30.0, -35.8, -28.5)
	m 9-3	806	532	0.79	4.54	(-29.7, -35.2, -23.4)
	m 10-1	1059	713	0.7	4.445	(-27.1, -30.9, -23.0)
1MFK-G1	m 1-1	1444	812	0.76	5.33	(-22.0, -25.7, -20.4)
	m 2-1	1084	658	0.77	4.93	(-22.3, -26.4, -22.8)
	m 3-1	1317	801	0.72	4.93	(-21.9, -26.0, -19.2)
	m 4-1	1411	869	0.7	4.87	(-22.5, -24.9, -17.8)
	m 5-2	858	581	0.75	4.43	(-22.4, -27.3, -22.6)
	m 6-1	1041	691	0.72	4.52	(-22.8, -25.4, -21.6)
	m 7-1	516	386	0.8	4	(-23.6, -27.8, -24.1)
	m 7-2	534	352	0.9	4.55	(-24.2, -30.1, -24.6)
	m 8-1	684	466	0.8	4.4	(-22.7, -28.3, -23.2)
	m 9-1	1147	761	0.7	4.52	(-22.4, -25.8, -18.6)
	m 10-1	1155	741	0.72	4.67	(-22.8, -25.3, -21.7)
	m 11-1	1270	773	0.73	4.93	(-22.3, -25.1, -19.3)
	m 12-1	1060	721	0.7	4.41	(-23.9, -24.5, -21.3)
	m 13-1	1221	729	0.76	5.02	(-22.3, -25.1, -23.0)
	m 14-1	994	673	0.71	4.43	(-22.2, -26.0, -20.2)
	m 15-1	1148	748	0.71	4.6	(-22.2, -25.4, -21.2)
	m 17-1	1420	868	0.7	4.9	(-21.0, -24.7, -20.7)
	m 18-2	859	575	0.76	4.48	(-22.8, -30.8, -20.7)
	m 19-1	1134	748	0.7	4.54	(-22.3, -25.8, -18.9)
	m 20-1	537	393	0.81	4.09	(-23.9, -27.8, -22.9)
	m 20-2	451	340	0.83	3.97	(-23.7, -30.2, -24.8
6W3M-G1	m 1-1	2039	1179	0.66	5.19	(-24.1, -35.9, -23.1)
	m 2-1	1556	940	0.69	4.97	(-21.7, -38.4, -20.9)
	m 3-1	1414	798	0.76	5.31	(-22.6, -37.9, -24.0)
	m 4-1	2993	1748	0.57	5.13	(-21.3, -26.7, -21.3)
	m 5-1	2085	1244	0.63	5.03	(-21.1, -35.1, -21.5)
	m 6-1	2397	1385	0.63	5.19	(-22.3, -30.3, -23.9)
	m 7-1	3223	1841	0.57	5.25	(-21.6, -25.7, -21.8)
	m 8-1	2525	1429	0.63	5.3	(-22.4, -31.7, -21.5)
	m 9-1	2978	1659	0.6	5.38	(-23.6, -28.1, -19.4)
	m 10-1	3326	1841	0.59	5.42	(-20.7, -25.6, -20.6)
1E4P-G2	m 3-2	430	328	0.84	3.93	(-66.1, -50.2, -27.1)
	m 6-2	224	204	0.87	3.29	(-66.7, -51.5, -28.0)
	m 7-2	440	365	0.76	3.61	(-67.2, -50.0, -27.1)
	m 9-1	317	266	0.84	3.56	(-66.1, -49.9, -28.6)
	m 11-1	629	446	0.79	4.22	(-64.8, -45.9, -27.5)
	m 14-2	514	395	0.78	3.9	(-65.4, -44.7, -27.6)
	m 15-1	243	224	0.84	3.25	(-66.6, -51.4, -27.6)
	m 16-2	361	297	0.82	3.64	(-66.4, -49.1, -27.8)
	m 17-1	181	184	0.84	2.94	(-70.1, -52.0, -27.6)
	m 19-1	299	253	0.85	3.54	(-66.1, -51.1, -27.7)
2N3Q-G1	m 1-1	2168	1126	0.72	5.77	(-31.1, -32.9, -44.8)
	m 2-1	1861	1044	0.7	5.35	(-30.4, -32.1, -44.7)
	m 3-3	1608	946	0.7	5.1	(-30.1, -32.2, -47.7)
	m 5-2	1331	763	0.77	5.23	(-31.3, -36.3, -47.6)
	m 7-1	2515	1521	0.59	4.96	(-25.6, -30.2, -47.5)
	m 8-2	1030	610	0.81	5.06	(-35.0, -35.4, -52.2)
	m 9-3	2526	1338	0.67	5.66	(-23.4, -30.2, -44.9)
	m 10-2	1426	936	0.65	4.57	(-30.3, -35.9, -45.1)
	m 11-2	2659	1415	0.66	5.63	(-24.8, -29.9, -44.7)
	m 12-2	2270	1156	0.72	5.89	(-30.3, -32.2, -46.8)
	m 13-3	1153	731	0.73	4.73	(-31.5, -35.2, -53.0)
	m 14-1	1593	897	0.74	5.33	(-28.5, -30.9, -47.4)
	m 16-2	1860	1085	0.67	5.14	(-34.4, -30.4, -48.1)
	m 17-3	2032	1034	0.75	5.89	(-33.4, -32.7, -47.8)
	m 18-2	1485	999	0.63	4.46	(-29.4, -36.4, -37.5)
	m 19-2	2477	1411	0.63	5.27	(-32.3, -23.4, -39.2)
	m 20-2	2278	1252	0.67	5.46	(-28.9, -31.9, -44.6)
	m 21-2	1250	675	0.83	5.56	(-26.3, -34.7, -48.0)
1MT4-G1	m 1-1	1124	729	0.72	4.62	(-21.5, -29.6, -18.5)
	m 2-1	831	523	0.82	4.76	(-24.5, -31.0, -19.7)
	m 2-2	413	301	0.89	4.12	(-27.3, -28.6, -26.1)
	m 3-1	1363	824	0.72	4.96	(-21.6, -26.8, -18.5)
	m 4-1	1347	804	0.73	5.02	(-22.7, -27.0, -18.5)
	m 5-1	1176	752	0.72	4.69	(-21.3, -28.8, -19.6)
	m 6-2	919	568	0.8	4.85	(-21.3, -27.3, -23.0)
	m 7-1	1490	852	0.74	5.24	(-21.4, -26.6, -18.5)
	m 8-1	948	575	0.81	4.94	(-25.2, -32.2, -21.0)
	m 8-2	337	265	0.88	3.81	(-27.1, -32.2, -25.1)
	m 9-1	1306	824	0.7	4.75	(-22.5, -29.4, -17.8)
	m 10-1	1396	827	0.73	5.06	(-21.9, -25.9, -18.7)
	m 11-1	1086	722	0.71	4.51	(-22.6, -27.8, -17.8)
	m 12-1	1187	754	0.72	4.72	(-23.7, -29.2, -19.0)
	m 13-1	1225	748	0.74	4.91	(-23.7, -30.1, -20.4)
	m 14-1	1246	776	0.72	4.81	(-23.2, -27.2, -18.1)
	m 15-1	853	546	0.8	4.68	(-24.1, -33.8, -19.8)
	m 15-2	387	295	0.87	3.93	(-26.9, -31.0, -25.1)
	m 16-1	1169	775	0.69	4.52	(-21.5, -27.6, -16.8)
	m 17-1	1388	832	0.72	5	(-23.1, -26.3, -17.6)
1QC8-G2	m 4-1	439	343	0.81	3.83	(-29.0, -32.3, -23.9)
	m 5-1	578	510	0.82	4.23	(-28.2, -27.5, -24.6)
	m 8-1	616	423	0.83	4.36	(-25.8, -31.3, -26.0)
	m 10-1	729	486	0.81	4.5	(-26.1, -28.1, -24.6)
	m 13-1	296	250	0.86	3.55	(-32.1, -32.3, -24.4)
	m 14-1	467	330	0.88	4.24	(-28.5, -32.7, -24.5)
	m 27-1	594	437	0.78	4.07	(-27.1, -32.5, -24.9)
6XXA-G1	m 1-1	251	251	0.77	3	(-37.9, -24.0, -22.2)
	m 2-1	919	604	0.76	4.56	(-29.6, -25.0, -21.2)
	m 3-1	860	555	0.79	4.64	(-31.3, -25.4, -20.4)
	m 4-1	1025	653	0.75	4.7	(-30.4, -25.2, -19.6)
	m 5-1	699	502	0.76	4.17	(-31.6, -24.6, -20.9)
	m 6-1	575	424	0.79	4.07	(-32.5, -23.3, -21.3)
	m 7-1	311	291	0.76	3.2	(-35.1, -23.2, -23.1)
	m 8-1	201	213	0.78	2.82	(-37.3, -24.8, -24.3)
	m 9-1	730	593	0.66	3.69	(-32.2, -24.8, -19.4)
	m 10-1	830	537	0.79	4.63	(-30.3, -24.6, -22.4)
2KRL-G2	m 1-2	1021	800	0.61	3.83	(-41.0, -40.8, -55.3)
	m 2-2	1560	993	0.65	4.71	(-46.3, -39.6, -48.0)
	m 3-2	1560	1051	0.62	4.45	(-45.6, -37.5, -45.4)
	m 4-2	884	616	0.72	4.3	(-46.3, -40.5, -52.8)
	m 5-2	1905	1130	0.66	5.05	(-44.9, -38.9, -47.0)
	m 6-2	1119	807	0.65	4.16	(-43.1, -40.6, -53.1)
	m 7-2	969	648	0.73	4.48	(-47.6, -40.7, -52.3)
	m 8-2	1606	1058	0.63	4.55	(-45.9, -38.6, -48.0)
	m 9-3	1306	817	0.71	4.79	(-51.5, -39.5, -48.1)
	m 10-2	1053	679	0.74	4.65	(-50.8, -39.7, -50.0)
1S9S-G9	m 9-6	306	237	0.92	3.86	(-38.7, -37.9, -70.7)
	m 10-5	340	264	0.89	3.85	(-36.6, -42.4, -66.4)
	m 12-6	466	329	0.88	4.24	(-47.6, -37.7, -59.8)
	m 13-5	346	266	0.9	3.9	(-53.4, -39.3, -66.8)
	m 15-5	426	340	0.81	3.76	(-37.8, -37.0, -67.9)
	m 16-5	393	314	0.83	3.75	(-52.5, -35.8, -61.9)
2N6W-G1	m 1-1	603	428	0.81	4.22	(-24.6, -62.1, -26.6)
	m 2-1	589	419	0.81	4.21	(-26.6, -60.8, -24.7)
	m 6-2	411	346	0.77	3.56	(-24.7, -60.0, -27.8)
	m 10-2	283	243	0.86	3.49	(-27.1, -61.0, -28.5)
2MQT-G2	m 1-2	1617	1025	0.65	4.73	(-20.4, -24.3, -57.9)
	m 2-2	701	520	0.73	4.04	(-33.0, -29.0, -58.0)
	m 3-2	769	504	0.8	4.57	(-35.4, -28.8, -58.6)
	m 4-1	1198	745	0.73	4.82	(-31.5, -25.3, -57.0)
	m 5-1	1641	1053	0.64	4.67	(-21.7, -22.1, -57.8)
	m 6-1	1630	936	0.72	5.22	(-24.4, -23.5, -54.7)
	m 7-2	1018	641	0.76	4.76	(-28.4, -30.1, -57.1)
	m 8-2	1066	645	0.78	4.96	(-30.1, -30.0, -57.8)
	m 9-1	1118	735	0.71	4.56	(-31.1, -25.5, -59.4)
	m 10-1	1357	790	0.75	5.15	(-30.1, -23.5, -60.4)
1TJZ-G2	m 8-1	286	268	0.78	3.2	(-29.9, -30.8, -22.8)
	m 10-1	588	451	0.75	3.91	(-24.3, -28.5, -22.4)
	m 15-1	332	320	0.72	3.11	(-28.7, -33.3, -23.0)
1AUD-G2	m 1-2	503	356	0.86	4.23	(-28.7, -32.2, -28.9)
	m 6-2	384	339	0.75	3.4	(-25.5, -31.8, -30.7)
	m 11-2	555	419	0.78	3.97	(-25.1, -33.9, -32.0)
	m 18-2	1050	656	0.76	4.8	(-24.3, -30.9, -28.5)
	m 29-2	389	313	0.82	3.73	(-26.1, -34.2, -31.0)
2N0R-G1	m 2-1	549	417	0.78	3.94	(-27.7, -32.8, -24.9)
	m 4-1	704	499	0.77	4.23	(-25.0, -31.7, -22.3)
	m 5-1	241	235	0.79	3.07	(-31.3, -35.8, -26.4)
	m 6-1	366	338	0.73	3.24	(-24.6, -34.1, -24.5)
	m 9-1	516	374	0.83	4.13	(-27.1, -33.8, -24.7)
	m 10-1	257	241	0.81	3.2	(-27.4, -33.1, -27.4)
1EKZ-G1	m 1-1	1121	660	0.79	5.09	(-25.7, -32.8, -33.0)
	m 2-1	980	636	0.75	4.62	(-27.2, -34.5, -23.0)
	m 3-1	1325	851	0.68	4.67	(-33.7, -28.8, -22.1)
	m 4-1	873	574	0.77	4.56	(-26.5, -36.9, -24.6)
	m 5-1	941	555	0.84	5.08	(-27.3, -31.4, -27.0)
	m 6-1	511	379	0.81	4.04	(-28.9, -34.9, -24.4)
	m 7-1	957	605	0.78	4.74	(-27.4, -32.7, -28.4)
	m 7-2	394	293	0.88	4.02	(-28.5, -36.8, -31.6)
	m 8-1	1852	1035	0.7	5.37	(-20.4, -26.3, -33.2)
	m 9-1	1869	962	0.76	5.83	(-35.4, -26.1, -22.4)
	m 10-1	1098	683	0.75	4.82	(-25.1, -31.1, -33.2)
	m 11-1	1696	955	0.72	5.32	(-22.9, -30.8, -24.5)
	m 12-1	1697	940	0.73	5.41	(-24.5, -28.4, -27.8)
	m 13-1	1765	917	0.77	5.77	(-21.4, -31.2, -31.9)
	m 14-1	1458	889	0.7	4.92	(-26.2, -24.9, -28.7)
	m 15-1	1307	801	0.72	4.89	(-24.2, -32.5, -32.4)
	m 16-1	2613	1253	0.73	6.25	(-22.0, -29.2, -28.5)
	m 17-1	1777	980	0.72	5.44	(-24.6, -28.3, -28.6)
	m 18-1	1205	721	0.76	5.01	(-25.9, -32.9, -27.9)
	m 19-1	1084	704	0.72	4.61	(-28.8, -31.5, -24.6)
	m 20-1	1033	674	0.73	4.59	(-33.9, -29.6, -28.1)
	m 21-1	2123	1104	0.72	5.77	(-27.6, -28.3, -27.5)
	m 22-1	2089	1074	0.74	5.83	(-28.7, -25.9, -23.5)
	m 23-1	1360	879	0.68	4.64	(-25.9, -27.5, -26.4)
	m 24-1	1625	931	0.72	5.23	(-25.5, -31.8, -21.4)
	m 25-1	1076	651	0.78	4.96	(-35.0, -29.6, -27.4)
	m 26-1	1947	1099	0.69	5.31	(-23.9, -30.7, -25.4)
	m 27-1	1604	878	0.75	5.48	(-32.1, -29.0, -22.9)
	m 28-1	1757	1020	0.69	5.16	(-34.3, -28.5, -22.6)
	m 29-1	1287	866	0.66	4.45	(-25.2, -30.6, -22.6)
	m 30-1	760	493	0.82	4.62	(-26.4, -36.0, -25.4)
	m 31-1	468	359	0.81	3.91	(-29.8, -27.4, -27.3)
	m 32-1	1321	799	0.73	4.96	(-25.8, -34.8, -24.0)
	m 33-1	1600	926	0.71	5.18	(-34.1, -27.8, -20.8)
	m 34-1	1130	705	0.74	4.81	(-23.9, -32.1, -32.7)
	m 36-1	485	350	0.85	4.15	(-27.1, -33.4, -33.0)
2LWK-G2	m 5-1	2381	1279	0.67	5.58	(-22.1, -26.7, -19.7)
	m 10-1	2294	1254	0.67	5.49	(-20.4, -28.0, -22.7)
	m 11-1	2372	1248	0.69	5.7	(-24.5, -26.9, -20.7)
2FEY-G3	m 1-3	584	468	0.72	3.74	(-24.1, -46.7, -25.8)
	m 3-3	428	366	0.75	3.5	(-27.0, -50.5, -25.1)
	m 4-3	256	242	0.8	3.16	(-27.8, -51.9, -25.7)
	m 5-3	226	209	0.86	3.23	(-28.3, -51.5, -28.5)
	m 8-2	710	553	0.7	3.85	(-23.5, -45.9, -24.3)
6IZP-G1	m 1-1	181	212	0.73	2.55	(-29.9, -31.7, -37.5)
	m 2-1	155	204	0.68	2.27	(-31.4, -31.3, -42.7)
	m 6-1	257	253	0.77	3.04	(-31.9, -30.6, -40.0)
	m 7-1	299	263	0.82	3.4	(-30.8, -30.4, -37.3)
	m 8-1	258	226	0.86	3.41	(-32.1, -31.3, -39.7)
	m 10-1	211	221	0.77	2.86	(-31.3, -32.8, -38.0)
1HWQ-G1	m 1-1	444	383	0.73	3.47	(-23.6, -38.0, -29.2)
	m 3-1	721	517	0.75	4.18	(-22.6, -34.3, -25.0)
	m 4-1	894	609	0.74	4.4	(-21.8, -34.8, -23.5)
	m 6-1	661	439	0.84	4.52	(-22.2, -36.8, -25.1)
	m 8-1	413	321	0.83	3.85	(-23.7, -36.3, -28.4)
	m 9-1	838	578	0.74	4.34	(-22.1, -34.6, -24.8)
	m 10-1	747	481	0.83	4.66	(-25.3, -37.2, -22.9)
	m 12-1	433	362	0.76	3.59	(-23.5, -38.6, -25.9)
	m 13-1	1329	978	0.6	4.07	(-18.1, -27.4, -24.1)
	m 16-1	451	341	0.83	3.96	(-23.8, -40.7, -26.4)
	m 18-1	247	214	0.89	3.45	(-24.9, -41.8, -28.2)
	m 20-1	432	352	0.78	3.67	(-23.8, -41.2, -24.4)
1P5M-G2	m 1-2	1487	963	0.65	4.63	(-37.4, -29.6, -21.7)
	m 3-2	1648	1054	0.64	4.69	(-42.4, -28.5, -21.0)
	m 4-2	1432	922	0.67	4.66	(-41.5, -28.0, -27.1)
	m 5-2	1061	707	0.71	4.5	(-42.7, -30.3, -27.2)
	m 6-2	1626	1022	0.65	4.77	(-40.1, -29.4, -19.8)
	m 7-1	1988	1220	0.63	4.89	(-39.8, -26.7, -20.9)
	m 8-1	1538	1001	0.64	4.61	(-41.6, -30.1, -23.7)
	m 9-2	2140	1226	0.65	5.23	(-37.5, -27.9, -19.6)
	m 10-1	2111	1360	0.59	4.66	(-37.1, -25.8, -18.6)
	m 11-2	1439	1001	0.62	4.31	(-38.3, -30.2, -22.9)
	m 12-2	680	461	0.81	4.42	(-41.7, -30.4, -27.0)
	m 12-3	846	566	0.76	4.48	(-37.7, -35.9, -23.0)
	m 13-2	1661	1066	0.64	4.67	(-36.5, -27.2, -20.5)
	m 15-2	1707	1097	0.63	4.67	(-39.9, -26.8, -20.8)
	m 16-2	1819	1139	0.63	4.79	(-37.3, -31.3, -20.8)
	m 17-2	2154	1263	0.64	5.11	(-37.2, -26.7, -21.1)
	m 18-1	1096	705	0.73	4.66	(-38.6, -31.3, -23.7)
	m 19-2	689	509	0.74	4.06	(-41.7, -31.0, -28.8)
	m 20-2	2284	1436	0.58	4.77	(-39.5, -25.1, -14.8)
	m 21-1	1802	1133	0.63	4.77	(-38.2, -25.2, -25.0)
	m 22-2	1376	913	0.65	4.52	(-38.7, -29.5, -24.6)
2EUY-G1	m 1-1	726	496	0.79	4.39	(-21.3, -39.1, -26.6)
	m 2-1	657	488	0.75	4.03	(-20.5, -39.8, -26.9)
	m 3-1	356	289	0.84	3.69	(-23.9, -41.1, -28.4)
	m 3-3	769	531	0.76	4.34	(-24.5, -37.7, -26.0)
	m 4-1	561	407	0.81	4.13	(-24.0, -39.6, -26.7)
	m 5-1	1089	745	0.69	4.38	(-18.0, -37.1, -24.9)
	m 6-1	680	461	0.81	4.42	(-20.5, -40.1, -28.6)
	m 7-1	778	598	0.68	3.9	(-21.7, -39.8, -25.3)
	m 8-1	326	274	0.83	3.56	(-23.5, -43.3, -30.5)
	m 9-1	735	503	0.78	4.38	(-20.6, -38.3, -28.2)
	m 10-1	780	548	0.75	4.26	(-20.8, -36.2, -27.2)
	m 11-1	431	335	0.82	3.85	(-23.3, -44.5, -30.4)
	m 12-1	380	331	0.77	3.44	(-23.6, -37.6, -28.1)
	m 13-1	910	615	0.74	4.43	(-20.1, -37.1, -24.4)
	m 15-1	596	406	0.84	4.4	(-20.8, -42.4, -28.6)
2M58-G1	m 1-1	1093	683	0.75	4.8	(-60.2, -21.5, -22.2)
	m 2-1	2863	1460	0.67	5.88	(-33.7, -31.0, -30.8)
	m 3-1	1092	695	0.74	4.71	(-47.8, -21.3, -35.2)
	m 4-1	2162	1212	0.67	5.35	(-35.1, -29.0, -33.7)
	m 5-1	2199	1498	0.66	5.83	(-34.7, -34.8, -20.6)
	m 6-1	391	288	0.9	4.06	(-47.0, -28.3, -39.4)
	m 6-2	643	456	0.79	4.23	(-45.4, -28.4, -34.9)
	m 7-2	1042	699	0.71	4.47	(-41.4, -43.1, -22.7)
	m 8-1	1725	1064	0.65	4.86	(-43.2, -33.2, -29.9)
	m 9-1	2452	1270	0.69	5.79	(-34.5, -33.3, -31.1)
	m 10-1	1715	1022	0.68	5.03	(-37.2, -32.1, -37.7)
7LVA-G3	m 1-3	1868	1026	0.71	5.46	(-54.8, -43.6, -40.7)
	m 2-3	1910	1030	0.72	5.56	(-54.6, -43.9, -40.0)
	m 3-3	1929	1039	0.72	5.57	(-54.6, -43.8, -40.0)
	m 5-3	4799	2673	0.51	5.38	(-50.6, -28.3, -26.5)
	m 7-3	4633	2638	0.51	5.27	(-49.9, -32.2, -26.3)
	m 8-3	4277	2389	0.53	5.37	(-54.1, -29.8, -27.9)
	m 10-3	1875	1047	0.7	5.37	(-56.3, -41.3, -43.2)
1A9L-G1	m 1-1	303	270	0.81	3.36	(-31.5, -47.5, -27.1)
	m 2-1	626	437	0.81	4.29	(-30.5, -42.3, -26.3)
	m 3-1	283	252	0.83	3.36	(-31.2, -49.6, -25.4)
	m 4-1	553	415	0.78	3.99	(-31.4, -42.6, -26.7)
	m 5-1	512	400	0.77	3.84	(-29.9, -45.8, -26.6)
	m 6-1	358	297	0.82	3.62	(-31.9, -46.8, -26.5)
	m 7-1	454	358	0.8	3.8	(-31.6, -45.9, -26.5)
	m 8-1	303	266	0.82	3.41	(-32.0, -46.6, -28.2)
	m 9-1	394	329	0.79	3.59	(-32.2, -46.8, -25.9)
	m 10-1	588	396	0.86	4.45	(-29.5, -42.8, -27.7)
	m 11-1	244	215	0.88	3.4	(-32.6, -47.9, -23.7)
	m 12-1	636	435	0.82	4.38	(-29.2, -44.3, -27.7)
1E4P-G1	m 1-1	354	332	0.73	3.2	(-67.3, -50.1, -23.4)
	m 2-1	417	350	0.77	3.57	(-68.4, -46.1, -24.0)
	m 3-1	446	369	0.76	3.62	(-66.7, -50.3, -23.4)
	m 4-1	293	280	0.76	3.13	(-68.8, -45.7, -25.7)
	m 5-1	249	254	0.75	2.94	(-68.5, -47.7, -25.5)
	m 6-1	503	384	0.8	3.93	(-66.3, -50.1, -23.0)
	m 7-1	320	288	0.78	3.33	(-68.9, -50.2, -24.8)
	m 8-1	734	513	0.77	4.29	(-65.5, -45.0, -24.3)
	m 10-1	1238	863	0.65	4.3	(-64.9, -47.2, -18.6)
	m 13-1	460	378	0.76	3.65	(-67.6, -50.6, -24.5)
	m 14-1	357	347	0.7	3.08	(-66.7, -48.1, -24.4)
	m 16-1	515	410	0.76	3.77	(-66.4, -49.3, -22.8)
	m 18-1	536	403	0.79	3.99	(-65.1, -52.2, -23.1)
1ANR-G1	m 1-1	1205	770	0.71	4.69	(-27.6, -28.0, -25.2)
	m 2-1	1258	720	0.78	5.24	(-26.3, -28.6, -26.6)
	m 3-1	737	629	0.63	3.51	(-24.2, -32.5, -25.8)
	m 4-1	941	620	0.75	4.55	(-35.4, -26.5, -19.9)
	m 5-1	1305	778	0.74	5.03	(-26.9, -32.1, -25.9)
	m 8-1	1756	888	0.79	5.93	(-24.2, -28.0, -22.1)
	m 9-1	984	716	0.67	4.12	(-25.3, -29.5, -26.0)
	m 11-1	1233	724	0.77	5.1	(-24.2, -30.5, -26.0)
	m 18-1	838	612	0.7	4.1	(-26.4, -24.8, -27.9)
	m 19-1	1344	997	0.59	4.04	(-23.7, -29.7, -23.3)
	m 20-1	1279	787	0.72	4.87	(-26.4, -26.9, -22.0)
2N82-G2	m 2-2	505	374	0.82	4.05	(-29.0, -27.7, -32.6)
	m 4-2	477	403	0.73	3.55	(-34.9, -26.8, -30.8)
	m 10-2	354	311	0.78	3.41	(-29.5, -27.3, -32.9)
	m 17-2	526	406	0.78	3.88	(-33.5, -24.3, -32.1)
2LKR-G6	m 4-1	583	453	0.74	3.86	(-46.3, -42.3, -63.6)
	m 5-1	501	433	0.7	3.47	(-47.2, -41.1, -62.2)
	m 6-1	425	355	0.77	3.59	(-45.9, -44.1, -63.7)
	m 7-1	379	346	0.73	3.28	(-47.7, -42.5, -62.8)
	m 8-2	689	506	0.74	4.08	(-46.1, -41.8, -61.1)
	m 9-1	558	455	0.72	3.68	(-45.2, -41.3, -64.4)
	m 10-1	907	598	0.76	4.54	(-42.2, -41.7, -61.7)
6VAR-G3	m 1-3	337	341	0.69	2.96	(-44.3, -37.8, -31.4)
	m 2-3	425	387	0.71	3.29	(-43.2, -35.1, -32.1)
	m 4-3	325	312	0.73	3.12	(-45.0, -36.9, -34.8)
	m 5-1	614	473	0.74	3.89	(-43.4, -37.6, -30.6)
	m 6-2	731	582	0.67	3.76	(-45.1, -36.4, -29.2)
	m 7-2	326	316	0.72	3.09	(-45.3, -37.8, -33.1)
	m 10-3	233	224	0.82	3.12	(-45.8, -39.2, -36.0)
1B36-G1	m 1-1	909	524	0.87	5.2	(-27.7, -45.1, -22.0)
	m 2-1	781	477	0.86	4.9	(-27.8, -44.2, -22.4)
	m 7-1	714	488	0.79	4.39	(-24.3, -49.3, -23.6)
	m 9-1	578	411	0.81	4.21	(-23.7, -43.4, -29.0)
	m 10-1	602	439	0.78	4.11	(-26.9, -43.2, -24.4)
2N82-G3	m 6-1	561	464	0.71	3.62	(-31.0, -23.8, -31.6)
	m 13-1	346	265	0.9	3.9	(-36.3, -24.4, -29.9)
	m 18-1	460	418	0.69	3.3	(-33.1, -24.7, -31.3)
2N7M-G2	m 1-2	575	439	0.76	3.92	(-46.9, -55.5, -43.0)
	m 2-1	401	339	0.77	3.54	(-49.3, -56.6, -44.3)
	m 3-1	747	592	0.67	3.78	(-51.5, -54.1, -39.4)
	m 5-2	611	455	0.76	4.02	(-46.2, -56.5, -40.2)
	m 6-1	646	525	0.69	3.69	(-54.5, -53.8, -40.3)
	m 7-1	467	428	0.68	3.27	(-52.2, -55.0, -41.1)
	m 8-2	527	393	0.8	4.02	(-46.2, -56.4, -43.3)
	m 9-1	1077	727	0.7	4.44	(-50.1, -49.7, -41.3)
	m 10-2	532	406	0.78	3.93	(-47.2, -55.3, -43.2)
1D6K-G2	m 2-1	692	522	0.72	3.97	(-22.3, -42.2, -23.8)
	m 3-1	229	215	0.84	3.19	(-22.4, -47.3, -26.6)
	m 5-1	390	341	0.76	3.42	(-23.0, -48.8, -24.6)
	m 7-1	688	540	0.7	3.82	(-21.4, -46.0, -23.8)
	m 8-1	252	261	0.74	2.89	(-24.7, -48.3, -26.0)
	m 9-1	674	533	0.7	3.79	(-21.3, -45.5, -23.8)
	m 10-1	745	493	0.81	4.53	(-19.8, -42.9, -27.0)
	m 12-1	698	515	0.74	4.06	(-20.0, -44.3, -24.4)
	m 13-1	459	412	0.7	3.33	(-22.8, -44.6, -25.6)
	m 14-1	689	480	0.79	4.3	(-21.2, -49.2, -27.3)
	m 15-1	618	502	0.7	3.69	(-22.8, -44.6, -26.6)
	m 19-1	601	503	0.68	3.58	(-22.3, -42.1, -23.7)
1P5M-G3	m 1-3	366	289	0.85	3.79	(-44.3, -35.0, -26.5)
	m 4-3	462	404	0.72	3.43	(-41.5, -35.1, -26.4)
	m 6-3	358	282	0.86	3.8	(-46.3, -34.4, -26.7)
	m 7-2	1137	843	0.62	4.04	(-41.5, -34.8, -20.1)
	m 8-2	348	304	0.79	3.43	(-46.0, -35.6, -29.3)
	m 9-3	318	271	0.83	3.51	(-43.8, -34.6, -26.8)
	m 10-3	371	306	0.81	3.63	(-43.5, -36.2, -25.8)
	m 13-3	228	206	0.87	3.31	(-44.6, -34.7, -28.7)
	m 14-2	344	303	0.78	3.4	(-44.0, -34.4, -29.8)
	m 16-3	435	364	0.76	3.58	(-43.7, -32.8, -28.2)
	m 17-3	317	308	0.73	3.08	(-42.5, -35.7, -28.1)
	m 18-3	423	310	0.88	4.09	(-43.2, -35.8, -25.6)
	m 19-3	405	310	0.85	3.91	(-43.4, -34.4, -28.7)
	m 20-3	469	359	0.81	3.91	(-44.8, -36.2, -25.1)
	m 21-2	1190	800	0.68	4.46	(-38.0, -32.3, -23.6)
	m 22-3	746	533	0.75	4.2	(-39.2, -35.7, -26.9)
1Z31-G1	m 1-1	974	586	0.81	4.99	(-28.1, -26.5, -34.1)
	m 2-1	1155	677	0.79	5.11	(-27.4, -25.8, -32.5)
	m 3-1	1018	630	0.78	4.85	(-29.6, -25.4, -29.0)
	m 4-1	1354	817	0.72	4.97	(-25.8, -20.9, -31.3)
	m 5-1	1347	786	0.75	5.14	(-29.4, -22.3, -33.5)
	m 6-1	1424	829	0.74	5.15	(-23.5, -23.4, -32.5)
	m 7-1	1833	1099	0.66	5	(-26.8, -26.4, -21.8)
	m 8-1	1404	796	0.76	5.29	(-28.9, -26.0, -31.0)
	m 9-1	1167	640	0.84	5.47	(-29.6, -28.4, -33.5)
	m 10-1	1109	658	0.79	5.05	(-26.7, -23.0, -32.4)
2N6W-G2	m 3-1	320	254	0.89	3.78	(-28.5, -62.5, -24.8)
	m 5-1	372	334	0.75	3.34	(-27.5, -60.7, -26.1)
	m 6-1	233	197	0.93	3.55	(-28.2, -60.8, -27.1)
	m 7-1	395	308	0.84	3.84	(-26.8, -62.7, -22.9)
	m 9-1	339	284	0.83	3.58	(-29.9, -60.0, -23.5)
	m 10-1	408	299	0.89	4.09	(-28.2, -61.1, -25.4)
1P5O-G5	m 5-1	901	633	0.71	4.26	(-57.3, -42.7, -23.6)
	m 8-1	1082	716	0.71	4.53	(-53.0, -40.0, -21.7)
	m 9-1	1009	669	0.73	4.52	(-53.3, -44.2, -23.0)
	m 11-1	745	527	0.75	4.24	(-55.1, -39.6, -24.2)
	m 12-1	592	412	0.83	4.3	(-53.0, -41.0, -28.6)
2LC8-G2	m 1-2	884	568	0.78	4.67	(-43.9, -35.7, -27.0)
	m 4-2	1496	970	0.65	4.36	(-43.7, -30.9, -23.7)
	m 5-2	368	294	0.84	3.75	(-44.6, -36.2, -28.8)
	m 7-2	542	353	0.91	4.59	(-45.0, -41.5, -28.9)
	m 8-2	1384	874	0.69	4.75	(-47.4, -29.7, -18.0)
	m 9-1	891	655	0.68	4.08	(-44.0, -34.2, -26.6)
	m 10-2	952	537	0.87	5.31	(-46.7, -33.5, -26.4)
2LDT-G1	m 1-1	530	383	0.83	4.15	(-35.5, -36.7, -25.4)
	m 2-1	470	380	0.77	3.71	(-37.8, -36.7, -25.7)
	m 3-1	548	409	0.79	4.01	(-37.6, -37.0, -22.4)
	m 4-1	759	547	0.73	4.16	(-33.6, -36.9, -22.6)
	m 5-1	975	592	0.8	4.94	(-32.2, -36.5, -23.1)
	m 6-1	646	436	0.83	4.44	(-34.5, -36.8, -24.0)
	m 7-1	601	426	0.81	4.23	(-37.3, -38.8, -22.9)
	m 8-1	850	551	0.79	4.62	(-33.2, -36.3, -20.5)
	m 9-1	915	572	0.8	4.79	(-34.3, -37.0, -22.2)
	m 10-1	878	551	0.8	4.78	(-34.6, -36.0, -24.2)
	m 11-1	854	538	0.81	4.76	(-34.5, -36.9, -22.8)
	m 12-1	445	330	0.85	4.04	(-35.1, -37.4, -23.9)
	m 13-1	979	593	0.8	4.95	(-33.8, -37.1, -22.2)
2KTZ-G2	m 1-2	2357	1241	0.69	5.7	(-20.0, -23.6, -35.7)
	m 3-2	719	415	0.93	5.2	(-29.2, -29.7, -38.3)
	m 3-3	1163	650	0.82	5.36	(-28.5, -27.1, -36.2)
	m 4-2	2677	1277	0.73	6.29	(-19.9, -23.8, -35.5)
	m 6-3	1084	667	0.76	4.87	(-30.0, -27.7, -36.6)
	m 7-2	2622	1252	0.73	6.28	(-22.9, -23.8, -35.4)
	m 8-2	2446	1257	0.7	5.83	(-22.1, -24.0, -35.4)
	m 9-2	2657	1322	0.7	6.03	(-20.8, -23.9, -35.3)
	m 10-2	2291	1201	0.7	5.27	(-20.0, -22.4, -37.4)
1JO7-G1	m 1-1	804	595	0.7	4.05	(-20.8, -35.3, -21.5)
	m 2-2	282	245	0.85	3.45	(-27.7, -41.4, -22.9)
	m 3-1	596	433	0.79	4.13	(-24.4, -38.2, -21.7)
	m 4-2	354	280	0.86	3.78	(-26.0, -41.0, -22.8)
	m 5-2	279	233	0.89	3.59	(-26.9, -42.4, -22.7)
	m 6-1	548	424	0.76	3.88	(-22.4, -37.6, -21.4)
	m 7-2	396	332	0.78	3.57	(-26.3, -39.1, -23.0)
	m 8-2	335	281	0.83	3.57	(-26.1, -40.6, -23.0)
	m 14-2	338	280	0.84	3.61	(-26.0, -40.9, -23.1)
	m 16-1	431	379	0.73	3.41	(-27.0, -40.3, -20.6)
	m 16-2	417	311	0.87	4.02	(-26.9, -41.4, -21.5)
	m 17-2	432	379	0.73	3.41	(-21.5, -40.8, -22.1)
	m 19-1	1299	995	0.58	3.91	(-21.4, -31.1, -20.2)
	m 21-1	1057	756	0.66	4.19	(-22.4, -35.3, -19.8)
	m 22-2	337	265	0.88	3.81	(-27.6, -41.3, -24.1)
	m 23-1	617	498	0.7	3.72	(-21.8, -36.0, -21.8)
	m 25-1	812	595	0.71	4.09	(-21.9, -35.7, -22.1)
	m 26-1	658	513	0.71	3.84	(-20.7, -34.0, -23.7)
	m 27-1	849	604	0.72	4.21	(-22.0, -36.3, -20.6)
	m 29-2	422	368	0.74	3.43	(-24.1, -36.9, -21.0)
	m 31-1	673	524	0.71	3.85	(-22.9, -37.5, -23.7)
	m 32-1	274	266	0.77	3.09	(-24.4, -39.2, -24.0)
2LHP-G1	m 1-1	2066	1285	0.61	4.82	(-39.5, -23.9, -12.7)
	m 2-1	2283	1373	0.61	4.99	(-38.6, -22.4, -10.3)
	m 3-2	1512	947	0.67	4.79	(-43.5, -23.1, -16.7)
	m 4-1	1322	789	0.74	5.03	(-44.6, -25.1, -19.8)
	m 5-1	2613	1390	0.66	5.64	(-37.2, -22.8, -10.5)
	m 6-1	1923	1210	0.62	4.77	(-38.5, -25.2, -11.0)
	m 7-1	2322	1274	0.67	5.46	(-43.2, -23.3, -9.1)
	m 8-3	762	495	0.81	4.61	(-41.9, -28.1, -21.9)
	m 9-1	1186	715	0.76	4.97	(-41.9, -28.6, -20.8)
	m 10-1	1985	1158	0.66	5.14	(-44.6, -23.8, -12.0)
1P5O-G2	m 1-2	313	264	0.84	3.55	(-54.6, -45.5, -25.9)
	m 2-3	509	377	0.82	4.05	(-55.4, -44.7, -23.3)
	m 4-2	367	293	0.84	3.75	(-52.3, -45.9, -26.1)
	m 6-3	477	357	0.83	4	(-55.3, -43.0, -27.5)
	m 7-2	228	207	0.87	3.29	(-54.9, -47.5, -30.1
	m 9-3	742	560	0.71	3.97	(-52.8, -48.4, -24.3)
	m 10-3	501	375	0.81	4	(-54.6, -45.5, -26.7)
	m 12-3	384	321	0.79	3.58	(-53.6, -43.3, -26.8)
6HAG-G1	m 1-1	3074	1513	0.68	6.09	(-40.0, -28.4, -23.4)
	m 2-1	1569	922	0.71	5.1	(-39.4, -26.7, -27.0)
	m 3-2	1657	896	0.76	5.55	(-39.2, -28.0, -29.5)
	m 4-1	1522	856	0.75	5.33	(-41.5, -31.8, -27.2)
	m 5-1	1634	1330	0.5	3.68	(-39.2, -27.1, -24.3)
2LU0-G3	m 2-1	1080	777	0.65	4.17	(-43.5, -36.2, -33.3)
	m 3-1	1160	738	0.72	4.71	(-37.4, -34.0, -34.0)
	m 4-1	1300	725	0.79	5.38	(-42.2, -34.9, -39.6)
	m 6-1	1153	782	0.68	4.42	(-40.5, -35.2, -35.2)
	m 7-1	1018	797	0.61	3.83	(-43.1, -32.4, -33.2)
	m 8-1	977	691	0.69	4.24	(-41.1, -31.0, -32.3)
	m 16-2	1270	685	0.83	5.56	(-43.5, -34.7, -28.8)
	m 17-1	885	684	0.65	3.88	(-38.5, -29.9, -36.6)
	m 20-1	1577	995	0.66	4.75	(-37.6, -30.5, -32.1)
1TJZ-G1	m 1-1	541	403	0.8	4.02	(-25.9, -30.9, -20.1)
	m 3-1	522	444	0.7	3.52	(-27.7, -35.0, -22.1)
	m 5-1	1031	679	0.73	4.55	(-25.3, -28.4, -19.2)
	m 6-1	809	555	0.76	4.37	(-26.7, -30.7, -18.8)
	m 7-1	565	476	0.69	3.55	(-24.6, -30.0, -23.5)
	m 13-1	357	315	0.77	3.4	(-29.2, -33.4, -20.1)
	m 16-1	370	317	0.78	3.49	(-27.4, -34.1, -24.2)
	m 17-1	1226	784	0.71	4.69	(-22.8, -24.7, -20.4)
1B36-G2	m 1-2	748	536	0.74	4.18	(-28.3, -42.5, -21.9)
	m 2-2	300	239	0.91	3.76	(-30.2, -46.3, -25.7)
	m 3-1	441	378	0.74	3.5	(-28.1, -43.2, -25.2)
	m 4-1	487	368	0.81	3.97	(-29.9, -44.6, -25.2)
	m 8-1	974	622	0.76	4.69	(-26.8, -37.0, -24.7)
	m 10-2	958	631	0.74	4.55	(-28.2, -41.4, -21.3)

## Sheet: Flexibility pocket
Pocket group ID	Pocket ID	Volume (Å3)	Surface area (Å2)	Sphericity	Effective radius (Å)	Center of mass (Å)
1HWQ-G3	m 8-2	400	335	0.78	3.58	(-26.2, -33.0, -27.0)
	m 11-1	376	287	0.88	3.92	(-26.3, -36.6, -24.2)
	m 15-1	335	285	0.82	3.52	(-26.7, -39.0, -24.7)
2MTK-G3	m 2-1	557	440	0.74	3.79	(-28.2, -40.9, -34.1)
	m 6-2	510	424	0.73	3.6	(-27.6, -41.4, -29.6)
	m 9-2	353	293	0.82	3.6	(-29.8, -40.5, -32.3)
1ULL-G1	m 1-1	354	277	0.87	3.83	(-34.9, -33.1, -30.5)
	m 2-1	1803	1062	0.67	5.09	(-31.5, -24.9, -20.1)
	m 3-1	2138	1235	0.65	5.19	(-29.8, -22.8, -16.9)
	m 6-1	430	329	0.84	3.92	(-37.3, -33.1, -24.3)
	m 7-1	233	193	0.95	3.62	(-40.4, -34.4, -23.9)
2N3O-G1	m 1-1	1251	714	0.79	5.25	(-25.6, -30.1, -24.9)
	m 2-1	1106	672	0.77	4.93	(-27.4, -27.7, -19.6)
	m 3-1	1217	715	0.77	5.1	(-25.8, -29.5, -24.2)
	m 4-1	1098	662	0.78	4.97	(-28.1, -29.5, -23.5)
	m 5-1	1200	703	0.78	5.12	(-25.5, -32.1, -20.0)
	m 6-1	1242	712	0.78	5.32	(-24.1, -31.5, -22.3)
	m 7-1	1215	684	0.8	5.32	(-24.6, -30.0, -25.5)
	m 8-1	1167	670	0.8	5.22	(-24.3, -31.7, -23.9)
	m 9-1	1141	675	0.78	5.07	(-28.1, -31.5, -22.6)
	m 10-1	1210	687	0.8	5.28	(-21.5, -31.5, -25.7)
	m 11-1	1119	678	0.77	4.95	(-25.8, -32.3, -22.2)
	m 12-1	1098	647	0.8	5.09	(-26.8, -30.4, -22.3)
	m 13-1	1079	658	0.77	4.92	(-28.7, -29.4, -22.9)
	m 14-1	1123	661	0.79	5.09	(-26.2, -28.8, -25.4)
	m 15-1	1236	714	0.78	5.19	(-24.0, -28.7, -25.5)
	m 16-1	1141	663	0.8	5.16	(-26.6, -32.3, -22.3)
	m 17-1	1131	678	0.77	5	(-28.3, -32.3, -22.3)
	m 18-1	1042	621	0.8	5.03	(-29.2, -30.3, -23.9)
	m 19-1	1314	785	0.74	5.02	(-23.4, -32.2, -22.3)
	m 20-1	1118	672	0.78	4.99	(-26.5, -32.2, -22.8)
1FYO-G1	m 1-1	1130	802	0.65	4.22	(-20.9, -28.3, -20.3)
	m 2-1	1301	886	0.65	4.4	(-20.9, -28.5, -19.6)
	m 4-1	1630	1056	0.53	4.63	(-20.6, -26.5, -18.5)
	m 5-1	932	729	0.63	3.83	(-21.6, -29.3, -19.9)
	m 6-1	1031	755	0.65	4.09	(-21.2, -29.4, -20.7)
	m 8-1	1495	1006	0.63	4.46	(-23.7, -23.0, -18.2)
	m 9-1	1187	805	0.67	4.42	(-21.9, -29.4, -20.0)
	m 10-1	1319	806	0.72	4.91	(-20.3, -26.7, -19.0)
	m 11-1	1171	812	0.66	4.32	(-21.0, -30.9, -19.3)
	m 12-1	1537	1009	0.64	4.57	(-21.5, -26.0, -19.2)
	m 13-2	903	569	0.79	4.76	(-23.7, -32.0, -17.8)
	m 14-1	1186	757	0.72	4.7	(-20.9, -29.5, -19.3)
	m 15-1	519	401	0.78	3.87	(-23.1, -35.0, -22.1)
	m 16-1	1464	960	0.65	4.57	(-22.3, -28.7, -19.2)
	m 17-1	1038	784	0.63	3.97	(-21.6, -28.5, -21.0)
	m 18-1	1251	922	0.61	4.07	(-21.7, -26.1, -19.9)
	m 19-2	961	647	0.73	4.45	(-22.3, -30.5, -17.3)
	m 20-1	1167	787	0.68	4.45	(-21.1, -30.7, -19.6)
	m 21-1	562	491	0.67	3.43	(-22.6, -33.5, -22.7)
	m 22-1	1192	862	0.63	4.14	(-23.5, -26.6, -19.2)
	m 23-1	1163	868	0.62	4.02	(-25.5, -27.2, -18.8)
	m 25-1	1373	856	0.7	4.81	(-21.3, -29.2, -18.8)
1TJZ-G3	m 9-1	278	233	0.88	3.57	(-28.8, -34.5, -24.2)
	m 14-1	404	334	0.79	3.62	(-30.2, -30.9, -21.4)
	m 19-1	352	296	0.81	3.56	(-28.2, -31.5, -23.2)
1JTJ-G1	m 1-1	454	377	0.76	3.61	(-27.3, -28.1, -24.4)
	m 4-1	790	570	0.72	4.15	(-22.1, -27.4, -26.3)
	m 5-1	725	498	0.78	4.36	(-24.7, -29.2, -23.9)
	m 6-1	684	546	0.69	3.75	(-23.8, -27.8, -23.1)
	m 8-1	631	481	0.74	3.93	(-21.7, -27.6, -27.0)
	m 11-1	738	520	0.76	4.25	(-22.0, -28.2, -27.1)
	m 13-1	802	632	0.66	3.8	(-22.2, -26.7, -24.2)
	m 18-1	658	506	0.72	3.9	(-22.6, -28.9, -26.0)
2N2P-G1	m 3-1	218	248	0.71	2.64	(-38.9, -34.4, -19.3)
	m 4-1	463	385	0.75	3.6	(-34.2, -31.0, -21.6)
	m 5-1	198	195	0.84	3.04	(-37.5, -34.2, -22.9)
	m 6-1	243	221	0.85	3.29	(-37.4, -34.9, -23.1)
1P5O-G3	m 1-3	854	578	0.75	4.43	(-54.6, -45.5, -25.9)
	m 2-1	2031	1310	0.59	4.65	(-52.0, -39.7, -11.2)
	m 3-1	1574	1047	0.62	4.51	(-48.8, -41.4, -14.2)
	m 4-3	800	556	0.75	4.31	(-50.3, -45.8, -20.7)
	m 5-3	440	366	0.76	3.6	(-60.5, -47.7, -22.3)
	m 6-1	2076	1282	0.61	4.86	(-49.2, -39.0, -14.1)
	m 7-3	616	449	0.78	4.11	(-53.4, -48.1, -24.4)
	m 8-3	777	565	0.72	4.12	(-50.1, -45.6, -21.1)
	m 10-1	1793	1111	0.64	4.84	(-50.3, -42.5, -14.4)
	m 11-3	571	427	0.78	4.01	(-53.8, -44.3, -22.3)
1LDZ-G1	m 1-1	632	503	0.71	3.77	(-28.6, -35.5, -25.7)
	m 2-1	653	523	0.7	3.74	(-29.2, -37.1, -24.0)
	m 3-1	625	479	0.74	3.91	(-28.7, -38.2, -25.6)
	m 4-1	659	529	0.69	3.74	(-29.2, -37.4, -23.8)
	m 5-1	575	474	0.71	3.64	(-30.6, -36.0, -25.5)
	m 6-1	531	437	0.73	3.64	(-30.7, -38.4, -25.4)
	m 7-1	759	554	0.73	4.11	(-29.1, -36.5, -24.2)
	m 8-1	1570	911	0.72	5.17	(-23.3, -31.4, -17.9)
	m 9-1	1219	822	0.67	4.45	(-28.5, -32.7, -19.7)
	m 11-1	558	480	0.68	3.48	(-29.7, -38.2, -25.8)
	m 12-1	537	442	0.72	3.64	(-30.0, -38.5, -26.2)
	m 13-2	333	291	0.8	3.42	(-27.5, -35.5, -27.5)
	m 14-2	387	296	0.87	3.92	(-29.5, -35.2, -26.7)
	m 15-2	279	251	0.82	3.33	(-25.3, -36.0, -27.6
	m 19-1	292	285	0.74	3.06	(-30.4, -34.7, -28.8)
	m 20-1	1654	1039	0.65	4.78	(-27.6, -26.2, -17.3)
	m 21-1	1537	1058	0.61	4.35	(-27.1, -25.8, -17.9)
	m 23-1	622	527	0.67	3.53	(-31.5, -36.3, -23.5)
1SCL-G1	m 1-1	474	363	0.81	3.91	(-24.1, -42.5, -23.4)
	m 3-1	428	366	0.75	3.51	(-24.2, -42.0, -25.2)
	m 5-1	355	309	0.78	3.44	(-24.3, -38.5, -26.4)
	m 6-1	339	298	0.79	3.41	(-24.8, -43.1, -24.1)
2LKR-G7	m 4-3	228	237	0.76	2.88	(-48.1, -42.2, -66.3)
	m 5-3	287	293	0.72	2.94	(-46.8, -42.8, -62.5)
	m 6-3	237	268	0.69	2.65	(-48.3, -43.3, -65.9)
1AQO-G1	m 3-1	987	608	0.79	4.87	(-26.0, -25.2, -31.5)
	m 5-1	1685	923	0.74	5.48	(-20.7, -20.9, -27.9)
	m 6-1	400	290	0.9	4.13	(-32.4, -24.3, -27.1)
	m 7-1	1349	833	0.71	4.85	(-31.5, -24.3, -24.6)
	m 8-1	1108	714	0.72	4.65	(-23.1, -25.3, -29.8)
	m 9-1	1030	679	0.73	4.55	(-29.7, -23.3, -23.8)
	m 14-1	1839	1090	0.67	5.06	(-23.8, -22.3, -26.1)
	m 15-1	1624	1054	0.63	4.62	(-19.2, -24.7, -27.9)
6NOA-G2	m 4-2	449	340	0.83	3.95	(-50.6, -31.2, -30.5)
	m 5-2	1006	661	0.73	4.56	(-46.1, -29.8, -26.2)
	m 6-2	418	320	0.84	3.92	(-50.6, -34.4, -30.3)
2LU0-G7	m 10-1	276	262	0.78	3.16	(-41.3, -39.7, -40.1)
	m 13-1	443	357	0.79	3.72	(-39.1, -37.1, -31.6)
	m 18-1	1441	1062	0.58	4.07	(-42.7, -30.1, -29.9)
2LU0-G1	m 1-1	571	384	0.87	4.46	(-40.6, -36.9, -36.7)
	m 2-2	636	540	0.66	3.53	(-45.3, -38.2, -31.1)
	m 3-2	1547	1052	0.61	4.41	(-36.3, -33.6, -23.4)
	m 4-2	1535	1144	0.56	4.02	(-35.7, -34.4, -27.9)
	m 5-1	2805	1598	0.6	5.26	(-35.3, -25.1, -24.8)
	m 6-2	594	445	0.77	4	(-42.6, -38.0, -35.6)
	m 7-2	950	605	0.77	4.71	(-44.2, -35.9, -30.5)
	m 8-2	925	564	0.81	4.91	(-42.9, -30.2, -32.8
	m 9-1	3343	2020	0.54	4.96	(-39.4, -33.2, -14.0)
	m 10-3	1559	1073	0.61	4.36	(-40.2, -30.5, -26.8)
	m 11-1	3002	1775	0.57	5.07	(-38.1, -28.9, -20.8)
	m 12-1	2502	1569	0.57	4.78	(-36.1, -31.0, -21.3)
	m 14-2	2125	1171	0.68	5.44	(-39.7, -34.3, -28.2)
	m 15-1	1139	769	0.69	4.44	(-43.4, -32.1, -29.7)
	m 17-2	1842	1115	0.65	4.96	(-39.2, -29.9, -23.9)
	m 19-1	1935	1149	0.65	5.05	(-40.2, -36.4, -24.2)
	m 20-2	950	624	0.75	4.56	(-39.5, -35.0, -31.0)
1A60-G1	m 1-1	705	597	0.64	3.54	(-56.0, -24.2, -26.0)
	m 2-1	564	433	0.76	3.91	(-56.6, -26.3, -31.7)
	m 5-1	536	452	0.71	3.56	(-54.8, -23.0, -29.3)
	m 6-1	270	270	0.75	3	(-55.3, -28.6, -31.7)
	m 7-1	272	272	0.75	3	(-55.6, -26.9, -32.7)
	m 9-1	537	439	0.73	3.66	(-52.5, -22.9, -26.0)
	m 12-1	763	563	0.72	4.06	(-54.0, -26.4, -25.5)
	m 13-1	413	338	0.79	3.66	(-54.2, -23.7, -29.2)
	m 14-1	302	281	0.77	3.22	(-51.5, -25.4, -31.6)
	m 15-1	405	339	0.78	3.58	(-54.7, -23.9, -30.4)
	m 17-1	363	301	0.82	3.61	(-55.1, -26.4, -29.9)
	m 18-1	514	472	0.66	3.27	(-54.4, -27.1, -27.5)
	m 19-1	469	410	0.71	3.43	(-51.7, -29.5, -27.8)
	m 21-1	1117	778	0.67	4.3	(-53.2, -24.4, -22.2)
	m 22-1	250	231	0.83	3.25	(-55.0, -27.9, -33.2)
	m 23-1	706	566	0.68	3.74	(-52.7, -23.5, -24.4)
	m 24-1	479	480	0.62	2.99	(-54.8, -24.0, -25.7)
2N3Q-G2	m 2-2	489	415	0.72	3.53	(-29.9, -34.6, -49.2)
	m 7-2	491	448	0.67	3.29	(-31.0, -32.3, -52.2)
	m 12-3	371	347	0.72	3.2	(-28.5, -35.6, -53.3)
	m 21-3	288	267	0.79	3.23	(-29.8, -37.4, -52.2)
1ANR-G2	m 5-2	359	340	0.72	3.17	(-30.1, -36.4, -29.4)
	m 10-1	741	517	0.76	4.29	(-30.4, -33.0, -27.9)
	m 14-1	282	277	0.75	3.05	(-31.2, -35.6, -29.1)
2N3Q-G3	m 3-1	449	347	0.82	3.88	(-33.9, -34.1, -52.8)
	m 4-1	1756	982	0.72	5.36	(-30.1, -31.2, -40.7)
	m 5-1	820	605	0.7	4.06	(-30.9, -35.8, -49.0)
	m 6-1	1642	995	0.68	4.95	(-24.0, -34.1, -44.1)
	m 9-2	698	571	0.67	3.67	(-29.7, -35.5, -49.4)
	m 12-1	774	654	0.62	3.55	(-28.0, -35.2, -48.3)
	m 13-1	1404	952	0.64	4.42	(-30.6, -28.8, -49.7)
	m 15-1	1803	1165	0.61	4.64	(-31.0, -29.5, -47.3)
	m 16-1	381	322	0.79	3.54	(-36.4, -32.6, -51.6)
	m 18-1	1022	687	0.71	4.46	(-28.4, -40.9, -37.9)
	m 19-1	817	534	0.79	4.58	(-35.5, -28.8, -45.3)
	m 20-1	937	602	0.77	4.67	(-32.8, -33.3, -49.2)
	m 21-1	1379	1078	0.56	3.83	(-21.8, -31.0, -46.2)
2N82-G4	m 7-2	366	341	0.72	3.21	(-31.6, -24.5, -31.9)
	m 8-2	459	411	0.7	3.35	(-31.5, -24.0, -33.2)
	m 13-2	319	295	0.76	3.24	(-35.4, -23.5, -29.7)
1TOB-G3	m 4-1	602	429	0.8	4.2	(-27.4, -27.7, -28.0)
	m 5-1	352	286	0.84	3.68	(-27.0, -29.7, -28.7)
	m 7-1	902	603	0.75	4.48	(-26.1, -26.4, -26.7)
1Z31-G2	m 1-2	245	198	0.96	3.71	(-32.2, -29.9, -36.1)
	m 2-2	783	560	0.73	4.19	(-29.0, -23.6, -34.0)
	m 4-2	340	296	0.79	3.44	(-29.9, -23.7, -37.5)
	m 5-2	742	509	0.78	4.37	(-33.9, -23.4, -35.3)
	m 8-2	512	398	0.78	3.85	(-34.1, -24.4, -33.3)
	m 9-2	295	288	0.74	3.07	(-32.0, -29.4, -34.8)
1NYB-G1	m 1-1	1097	725	0.71	4.53	(-25.7, -26.6, -23.5)
	m 2-1	407	377	0.7	3.23	(-26.7, -32.3, -28.5)
	m 3-1	1447	767	0.81	5.65	(-25.0, -28.1, -21.7)
	m 4-1	1236	733	0.76	5.06	(-25.6, -27.8, -23.0)
	m 5-1	1293	732	0.78	5.3	(-28.4, -27.7, -24.1)
	m 8-1	1244	766	0.73	4.87	(-25.1, -27.6, -22.7)
	m 10-1	870	579	0.76	4.5	(-23.8, -28.7, -25.1)
	m 11-1	361	334	0.73	3.24	(-27.3, -31.7, -27.4)
	m 12-1	1142	728	0.73	4.71	(-24.8, -29.1, -22.5)
	m 14-1	676	553	0.67	3.66	(-25.5, -30.1, -27.8)
1LDZ-G2	m 2-2	553	404	0.81	4.1	(-28.7, -33.5, -26.4)
	m 3-2	265	223	0.89	3.56	(-29.8, -39.5, -28.8)
	m 4-2	616	431	0.81	4.29	(-29.4, -33.4, -26.6)
	m 6-2	426	346	0.79	3.68	(-28.9, -38.5, -27.3)
	m 7-2	460	351	0.82	3.92	(-30.1, -35.0, -27.4)
	m 11-2	608	445	0.78	4.1	(-29.7, -36.0, -26.8)
	m 13-1	1192	856	0.63	4.17	(-26.9, -27.3, -19.1)
	m 23-2	511	378	0.82	4.05	(-31.7, -34.4, -26.4)
2N3Q-G5	m 4-2	360	312	0.78	3.45	(-37.1, -32.4, -46.5)
	m 13-2	752	544	0.73	4.14	(-33.7, -36.1, -50.5)
	m 15-2	312	294	0.75	3.18	(-39.3, -33.9, -52.3)
1BVJ-G2	m 4-1	353	273	0.88	3.87	(-24.9, -31.0, -24.3)
	m 8-2	335	266	0.87	3.77	(-24.7, -29.1, -24.4)
	m 21-1	361	273	0.9	3.69	(-24.4, -30.3, -25.2)
1D6K-G1	m 1-1	326	278	0.82	3.51	(-22.7, -49.2, -26.3)
	m 5-2	255	262	0.74	2.91	(-23.6, -48.9, -26.3)
	m 9-2	354	338	0.71	3.14	(-21.4, -47.4, -24.5)
	m 12-2	359	289	0.84	3.72	(-22.1, -44.2, -26.9)
	m 15-2	339	308	0.76	3.3	(-23.1, -46.3, -25.4)
	m 17-1	500	387	0.79	3.87	(-22.8, -47.6, -25.6)
	m 19-2	515	377	0.82	4.09	(-20.1, -44.9, -24.3)
	m 20-1	392	324	0.8	3.62	(-21.5, -46.2, -26.6)
2LKR-G2	m 1-2	4194	2336	0.54	5.39	(-24.3, -31.7, -53.1)
	m 2-2	2448	1434	0.61	5.12	(-37.1, -40.5, -58.1)
	m 3-3	3604	2053	0.55	5.26	(-30.7, -30.4, -55.1)
	m 4-5	3881	2114	0.56	5.51	(-26.8, -32.2, -54.0)
	m 5-6	3270	1889	0.56	5.19	(-29.2, -33.1, -53.8)
	m 6-5	4491	2264	0.58	5.95	(-25.7, -33.4, -53.4)
	m 7-4	1600	930	0.71	5.16	(-40.7, -39.5, -66.1)
	m 7-7	2222	1201	0.69	5.55	(-41.8, -34.1, -61.5)
	m 8-6	3437	1978	0.56	5.21	(-31.9, -32.0, -52.4)
	m 9-4	3964	2244	0.54	5.3	(-27.1, -33.0, -54.1)
	m 10-5	2297	1357	0.61	5.01	(-39.8, -39.8, -56.6)
2QH2-G1	m 1-1	712	614	0.63	3.47	(-22.1, -30.2, -22.3)
	m 3-1	838	645	0.67	3.9	(-22.0, -30.2, -24.5)
	m 4-1	257	254	0.77	3.03	(-25.2, -35.3, -24.8)
	m 5-1	296	319	0.67	2.78	(-25.9, -34.8, -24.8)
	m 5-2	209	224	0.76	2.79	(-25.5, -35.2, -26.9)
	m 6-1	755	618	0.65	3.66	(-21.4, -30.2, -24.4)
	m 8-1	839	652	0.66	3.86	(-21.9, -30.9, -23.4
	m 9-1	427	389	0.7	3.29	(-22.5, -34.9, -25.7)
	m 10-1	654	549	0.66	3.57	(-23.2, -31.3, -22.2)
	m 11-1	745	647	0.61	3.45	(-22.5, -30.7, -24.2)
	m 13-1	709	601	0.64	3.54	(-22.4, -29.9, -24.0)
	m 14-1	721	609	0.64	3.55	(-21.3, -30.4, -24.4)
	m 16-1	329	320	0.72	3.08	(-25.2, -34.6, -23.4)
	m 16-2	257	269	0.73	2.87	(-25.4, -35.4, -26.2)
	m 17-1	218	233	0.75	2.8	(-24.9, -36.0, -25.1)
	m 18-1	243	244	0.77	2.98	(-25.9, -36.5, -24.8)
	m 19-1	706	569	0.67	3.72	(-22.8, -31.2, -24.1)
	m 20-1	311	296	0.75	3.15	(-23.5, -35.6, -23.9)
7LVA-G4	m 4-1	1867	1039	0.71	5.39	(-55.7, -40.0, -45.1)
	m 5-1	2636	1448	0.64	5.46	(-53.3, -37.7, -38.6)
	m 7-1	2520	1380	0.65	5.48	(-58.9, -39.1, -37.9)
1AUD-G4	m 4-2	695	554	0.68	3.76	(-25.6, -29.1, -28.9)
	m 5-2	922	609	0.75	4.54	(-27.9, -32.1, -26.6)
	m 9-2	496	398	0.76	3.74	(-29.9, -28.6, -32.6)
	m 12-2	535	404	0.79	3.69	(-29.5, -28.7, -30.3)
	m 13-2	419	367	0.74	3.42	(-29.0, -30.7, -30.7)
	m 14-2	654	494	0.74	3.97	(-28.7, -30.0, -28.8)
	m 16-2	1173	694	0.77	5.06	(-29.4, -30.2, -28.6)
	m 19-2	475	409	0.72	3.48	(-24.5, -32.0, -33.3)
	m 20-2	911	611	0.74	4.47	(-27.1, -30.8, -28.7)
	m 21-2	1009	653	0.74	4.63	(-25.0, -30.9, -28.7)
	m 23-2	550	432	0.75	3.82	(-27.0, -29.1, -30.9)
	m 25-2	1174	780	0.69	4.51	(-25.8, -28.8, -27.6)
	m 27-2	510	453	0.68	3.37	(-27.5, -30.8, -32.0)
	m 28-2	670	523	0.71	3.84	(-27.0, -29.2, -32.4)
	m 30-3	272	247	0.82	3.3	(-30.6, -32.5, -32.0)
1R2P-G2	m 4-1	189	188	0.84	3.01	(-26.5, -49.1, -28.3)
	m 8-1	515	425	0.73	3.63	(-24.9, -43.2, -25.3)
	m 9-1	282	278	0.75	3.04	(-25.4, -44.2, -26.3)
1JUR-G2	m 2-1	634	451	0.79	4.22	(-24.6, -31.5, -22.0)
	m 3-1	829	613	0.7	4.05	(-26.3, -32.5, -19.7)
	m 9-1	845	615	0.7	4.12	(-23.4, -29.9, -22.9)
2LKR-G9	m 4-7	648	580	0.62	3.35	(-48.4, -35.3, -64.0)
	m 5-7	496	381	0.79	3.9	(-47.3, -42.3, -63.3)
	m 7-6	364	294	0.84	3.71	(-47.0, -42.4, -66.0)
	m 8-7	525	433	0.73	3.63	(-46.4, -38.4, -62.6)
2LUN-G2	m 1-2	541	375	0.86	4.33	(-32.3, -23.6, -31.8)
	m 2-1	1014	745	0.65	4.08	(-33.9, -18.4, -29.8)
	m 8-2	527	372	0.85	4.25	(-34.9, -25.4, -32.4)
6SDW-G2	m 1-2	290	280	0.76	3.11	(-34.4, -33.5, -35.7)
	m 2-2	250	211	0.91	3.55	(-33.8, -35.6, -36.3)
	m 3-2	438	358	0.78	3.66	(-34.3, -31.6, -32.5)
	m 4-2	260	210	0.93	3.7	(-34.4, -33.3, -34.0)
	m 9-2	244	206	0.92	3.55	(-34.2, -35.0, -33.8)
	m 17-2	251	233	0.82	3.22	(-32.3, -33.5, -34.2)
	m 19-2	368	293	0.85	3.76	(-34.5, -36.1, -32.7)
7LVA-G1	m 1-1	6353	3125	0.53	6.1	(-40.1, -38.2, -21.9)
	m 2-1	6221	3008	0.54	6.2	(-39.6, -39.3, -22.3)
	m 3-1	6266	2998	0.55	6.27	(-39.8, -39.3, -21.1)
	m 4-2	7340	3903	0.47	5.64	(-43.3, -33.2, -17.2)
	m 6-1	10960	5754	0.41	5.71	(-39.5, -36.4, -5.9)
	m 8-1	3865	2206	0.54	5.25	(-51.7, -36.5, -29.8)
	m 9-1	8602	4550	0.45	5.67	(-31.5, -36.5, -9.8)
	m 10-1	8350	4425	0.45	5.66	(-34.6, -31.2, -19.0)
2MIY-G1	m 1-1	254	226	0.85	3.36	(-41.9, -40.4, -29.2)
	m 3-1	320	290	0.78	3.3	(-41.0, -38.1, -27.5)
	m 5-1	544	423	0.76	3.86	(-39.0, -38.5, -26.4)
	m 9-1	720	531	0.73	4.06	(-39.7, -39.0, -27.3)
	m 10-1	689	508	0.74	4.07	(-37.4, -40.3, -27.9)
	m 11-2	1390	891	0.68	4.68	(-36.3, -38.0, -23.5)
	m 12-1	477	423	0.7	3.38	(-39.3, -40.4, -27.3)
	m 14-1	912	607	0.75	4.51	(-33.4, -36.2, -31.0)
	m 15-1	519	471	0.66	3.3	(-37.2, -41.1, -25.7)
	m 17-1	270	229	0.88	3.52	(-38.4, -39.5, -31.3)
	m 18-2	377	296	0.85	3.81	(-41.3, -41.8, -28.9)
2N82-G1	m 1-1	1407	935	0.65	4.51	(-26.6, -20.7, -29.3)
	m 2-1	736	533	0.74	4.14	(-29.1, -23.0, -30.7)
	m 3-1	1776	1102	0.64	4.83	(-29.3, -22.6, -23.3)
	m 4-1	534	432	0.74	3.71	(-34.8, -24.9, -27.4)
	m 5-1	510	444	0.69	3.44	(-29.2, -24.5, -31.7)
	m 5-2	989	655	0.73	4.53	(-26.3, -25.4, -32.1)
	m 6-2	669	512	0.72	3.91	(-34.4, -23.3, -31.3)
	m 7-1	623	482	0.73	3.87	(-33.7, -21.6, -29.1)
	m 8-1	668	513	0.72	3.9	(-33.1, -21.5, -30.7)
	m 9-1	1413	1044	0.58	4.06	(-28.2, -20.0, -25.0)
	m 10-1	713	514	0.75	4.15	(-28.8, -23.7, -30.9)
	m 11-1	1700	1103	0.62	4.62	(-25.0, -22.7, -28.1)
	m 12-1	551	424	0.77	3.89	(-33.4, -22.9, -29.8)
	m 14-1	883	592	0.75	4.47	(-28.9, -25.0, -29.0)
	m 15-1	1519	1053	0.61	4.33	(-27.6, -20.7, -26.2)
	m 16-1	1401	915	0.66	4.59	(-30.3, -24.1, -28.3)
	m 19-1	511	423	0.73	3.62	(-31.8, -24.4, -31.5)
	m 19-2	412	371	0.72	3.33	(-31.9, -26.4, -33.7)
1P5M-G4	m 2-1	420	345	0.79	3.65	(-35.5, -39.0, -26.7)
	m 10-2	876	689	0.64	3.81	(-39.5, -35.9, -21.1)
	m 18-2	460	401	0.72	3.43	(-41.1, -37.2, -25.0)
1S9S-G16	m 12-4	288	258	0.82	3.34	(-48.9, -37.0, -62.1)
	m 13-3	3265	1756	0.61	5.58	(-40.6, -34.9, -60.3)
	m 19-4	479	405	0.73	3.54	(-40.2, -38.8, -62.0)
1M5L-G2	m 1-2	382	298	0.85	3.84	(-28.8, -45.3, -29.9)
	m 2-1	356	311	0.78	3.43	(-31.2, -45.5, -31.1)
	m 4-1	179	190	0.8	2.81	(-29.1, -52.7, -27.0)
	m 7-1	313	285	0.78	3.29	(-27.8, -49.6, -26.7)
	m 9-1	1142	766	0.69	4.47	(-26.9, -38.2, -30.1)
	m 12-1	565	449	0.74	3.77	(-26.0, -46.5, -22.6)
	m 13-1	958	686	0.69	4.19	(-24.8, -40.5, -30.4)
	m 15-1	1041	633	0.78	4.93	(-25.6, -37.3, -30.8)
2N8V-G2	m 1-2	835	800	0.54	3.13	(-40.3, -37.7, -45.0)
	m 2-2	1033	906	0.55	3.42	(-43.6, -37.8, -42.6)
	m 3-2	574	591	0.57	2.91	(-40.7, -37.2, -48.6)
	m 4-2	502	592	0.52	2.54	(-42.4, -37.6, -43.4)
	m 6-2	406	379	0.7	3.21	(-44.8, -38.2, -45.7)
	m 9-2	699	669	0.57	3.13	(-40.7, -39.5, -45.4)
1S9S-G10	m 9-7	951	576	0.81	4.95	(-35.9, -35.1, -68.0)
	m 14-7	1616	1036	0.64	4.68	(-33.2, -27.1, -54.9)
	m 15-6	1743	1114	0.63	4.69	(-33.1, -29.7, -64.4)
2N3Q-G4	m 3-2	361	282	0.87	3.83	(-34.7, -36.9, -53.0)
	m 10-1	405	332	0.8	3.66	(-32.7, -40.0, -46.3)
	m 17-2	258	229	0.85	3.37	(-32.7, -38.5, -53.5)
1N8X-G1	m 1-1	2605	1500	0.61	5.21	(-9.5, -19.8, -41.8)
	m 2-1	1076	653	0.78	4.94	(-21.3, -23.2, -41.7)
	m 2-2	985	631	0.76	4.68	(-20.6, -21.7, -43.0)
	m 3-1	2278	1283	0.65	5.33	(-12.2, -19.6, -41.7)
	m 4-1	2654	1476	0.63	5.39	(-10.5, -19.8, -40.0)
	m 5-1	2719	1512	0.62	5.39	(-10.2, -20.7, -40.3)
	m 6-1	2405	1342	0.65	5.37	(-12.6, -20.6, -39.4)
	m 7-1	2628	1505	0.61	5.24	(-9.9, -19.5, -40.0)
	m 8-1	2508	1372	0.65	5.48	(-12.6, -20.0, -40.1)
	m 9-1	2722	1492	0.63	5.47	(-10.1, -19.0, -41.4)
	m 10-1	2413	1356	0.64	5.33	(-13.3, -20.3, -41.3)
	m 11-1	2154	1196	0.67	5.4	(-12.7, -22.2, -40.5)
	m 12-1	2554	1464	0.62	5.23	(-11.4, -20.0, -40.1)
	m 13-1	2492	1513	0.59	4.94	(-8.5, -20.6, -40.0)
	m 14-1	2894	1552	0.63	5.59	(-10.1, -19.7, -39.1)
	m 15-1	2774	1574	0.61	5.28	(-10.3, -19.4, -39.9)
	m 16-1	2586	1426	0.64	5.44	(-11.8, -19.3, -39.5)
	m 17-1	2738	1549	0.61	5.3	(-9.6, -19.5, -39.9)
	m 18-1	2027	1101	0.7	5.52	(-15.8, -23.2, -38.7)
	m 19-1	2832	1520	0.64	5.59	(-9.9, -21.6, -40.8)
	m 20-1	1902	1118	0.66	5.1	(-15.9, -23.0, -38.8)
1S9S-G2	m 1-2	1010	774	0.63	3.91	(-49.4, -32.8, -59.1)
	m 5-3	929	780	0.59	3.57	(-49.7, -34.4, -58.4)
	m 8-3	2264	1269	0.66	5.35	(-33.8, -33.4, -55.3)
	m 9-5	1796	1234	0.58	4.36	(-27.3, -33.6, -68.2
	m 10-3	3109	1961	0.53	4.76	(-20.0, -37.4, -62.6)
	m 14-5	2153	1071	0.75	6.03	(-33.4, -32.5, -58.3)
	m 15-3	1371	1006	0.59	4.09	(-28.3, -34.5, -65.1)
	m 16-3	1356	1167	0.51	3.49	(-48.8, -31.9, -53.9)
