# Supplementary material for: RPflex: A Coarse-Grained Network Model for RNA Pocket Flexibility Study
Source: Int J Mol Sci. 2023 Mar 13;24(6):5497. doi: 10.3390/ijms24065497 (PMC10058308; doi:10.3390/ijms24065497)
Supplement: Supplementary file 1 [file ijms-24-05497-s001.zip › Supplementary Data S3.xlsx]

## Sheet: Small
Class	Pocket group ID	PDB ID	Binding type	Nmunber of pockets	Flexibility score (Q)	RMSF (Å)	Overlapping volume (Å3)	Overlapping surface area (Å2)	Average volume (Å3)	Average surface area (Å2)	S /`P	Overlapping nucleotides
Rigidity	2GBH-G1	2GBH	N/A	5	0.0528332	0.0859167	388.998	320.373	407	335.2	0.03167	A6,A7,C4,G2,G3,U5,A17,A20,C22,G21,U18,U19,
	2NC1-G4	2NC1	N/A	5	0.0606309	0.219286	490.522	347.725	540	382.8	0.0559591	A687,A688,A691,A775,A781,C776,C779,G689,G690,G730,G731,G777,U778,U780,
	1S9S-G8	1S9S	N/A	3	0.0694479	0.236545	303.342	248.019	325.333	266	0.0550256	A340,A341,A343,C342,G321,G323,G324,G338,G339,U319,U322,
	1Q8N-G1	1Q8N	Ligand	20	0.0851901	0.287545	331.735	289.394	372.55	325	0.059812	C5,C6,C7,G8,A22,C10,C20,C21,G19,G23,G24,
	1A4T-G1	1A4T	Protein	20	0.0985135	0.415583	354.125	298.578	410.25	345.9	0.0748879	C5,C7,G4,G6,G9,U8,A12,A13,A14,C11,C16,G15,
	2NC1-G1	2NC1	N/A	6	0.103618	0.078	313.066	243.431	355.167	276.167	0.0789422	A781,C684,C784,C785,C786,C787,G680,G681,G682,G683,G782,G783,
	1BGZ-G1	1BGZ	N/A	3	0.104972	0.2548	273.431	255.041	302.333	282	0.0767539	A4,G1,G2,G3,A17,A18,C21,C22,G19,U20,
	1S9S-G12	1S9S	N/A	4	0.105573	0.130222	271.14	213.149	306.25	240.75	0.0785849	A314,C311,C315,C345,C346,C349,G312,G313,G347,
	2LK3-G2	2LK3	N/A	4	0.119226	0.202	224.188	207.884	247.5	229.5	0.0905401	C3,G1,G2,U4,A18,A21,C20,C23,G22,U19,
	6HYK-G1	6HYK	N/A	10	0.120254	0.306545	288.376	229.919	339.4	270.6	0.101021	G9,U8,A10,A13,C23,G12,G21,G25,U11,U22,U24,
	1N66-G2	1N66	N/A	3	0.121215	0.490333	255.982	213.806	291.333	243.333	0.0984541	A3,C4,C5,C7,C9,U6,A13,G10,G14,
	2LK3-G1	2LK3	N/A	10	0.125207	0.453714	408.714	289.622	468.8	332.2	0.0970671	A6,A8,G7,U4,U5,U9,A11,A15,A18,C10,G12,G17,U16,U19,
	1EXY-G1	1EXY	Protein	12	0.128911	0.5528	298.279	257.734	348.833	301.417	0.0976652	C4,C6,C7,G3,G5,C23,G21,G24,G25,U26,
	2MHI-G1	2MHI	N/A	12	0.129052	0.596	265.642	224.739	338.25	286.167	0.100932	C9,C11,C26,C29,C43,G10,G25,G28,U27,U42,U44,
	5IEM-G3	5IEM	N/A	4	0.132922	0.177231	414.361	298.033	459.5	330.5	0.0931335	A16,A35,C12,C13,C14,C15,C37,G34,G39,U17,U18,U36,U38,
	2L3E-G2	2L3E	N/A	20	0.134398	0.632385	499.395	360.774	640	462.35	0.0992491	C3,G1,G2,U4,U5,U6,A29,A30,A31,A32,C34,G28,G33,
	1T4L-G2	1T4L	N/A	9	0.135162	0.4539	226.295	184.734	274.667	224.222	0.122398	A6,A9,C7,C8,U5,A21,C22,G23,U10,U24,
	2KHY-G2	2KHY	N/A	10	0.141405	0.511538	330.775	268.092	411.6	333.6	0.107876	A13,A16,C17,C24,C25,G11,G14,G15,G21,G22,U12,U18,U23,
	2MHI-G2	2MHI	N/A	15	0.145815	0.466273	217.278	189.508	282.2	246.133	0.120608	A3,A4,G1,G2,C52,G48,U46,U47,U49,U50,U51,
	7K4L-G3	7K4L	N/A	3	0.14719	0.29925	388.355	285.955	438.667	323	0.115816	A15,A23,C13,C16,C21,C24,G17,G22,G25,U14,U18,U19,
	1TXS-G2	1TXS	N/A	5	0.149702	0.359636	318.662	242.176	380.8	289.4	0.123059	C4,G1,G2,G3,C34,C36,C37,G31,G33,G35,U32,
	2MHI-G4	2MHI	N/A	9	0.151557	0.4481	276.059	249.049	339.556	306.333	0.109607	A16,C11,C15,C23,C26,G12,G13,G25,U14,U24,
	2NC1-G3	2NC1	N/A	10	0.152798	0.137083	410.312	342.496	492.5	411.1	0.106251	A765,C732,C733,C735,C763,G736,G737,G738,G764,G766,U734,U762,
	2KXM-G1	2KXM	Ligand	10	0.154019	0.413231	445.252	302.091	542.1	367.8	0.131646	C3,C6,G2,G5,G9,U4,A17,A24,C22,C23,G19,G20,U21,
	1AUD-G1	1AUD	Protein	30	0.154417	0.841	323.484	258.098	419.2	334.467	0.117605	A24,A39,A44,C43,G25,G42,U40,
	5IEM-G2	5IEM	N/A	10	0.156471	0.40425	374.062	285.918	442.2	338	0.11715	A20,C22,C24,C25,C32,G19,G23,G29,G30,G31,U18,U21,
	2L3E-G1	2L3E	N/A	16	0.160372	0.529643	235.845	196.674	307.062	256.062	0.13467	A25,C12,C13,C14,C18,C21,C24,C26,G15,G17,G22,G23,U16,U19,
	1BYJ-G2	1BYJ	N/A	20	0.165065	0.215167	286.45	239.7	337	281.8	0.109141	A7,A9,C6,C8,C10,C11,C14,G15,G16,G17,U18,
	2QH2-G2	2QH2	N/A	4	0.169205	0.2735	168.374	177.798	201	212.25	0.122098	C7,C8,G6,U9,G15,G17,G18,U16,
	5KQE-G2	5KQE	N/A	20	0.170912	0.241385	489.739	372.742	612.4	466.1	0.121256	G1,G2,G3,G5,U4,U6,A31,A33,C29,C32,C35,U30,U34,
	2M8K-G2	2M8K	N/A	4	0.175113	0.363889	249.202	193.327	334.5	259.5	0.157718	G1,G2,U3,U4,A24,A25,A26,C22,C23,
	5A18-G1	5A18	N/A	10	0.176027	0.299923	491.235	396.45	584.6	471.8	0.117087	A2,A5,A7,C3,G1,G4,U6,A25,A27,C29,G30,U26,U28,
	2MHI-G3	2MHI	N/A	18	0.181815	0.815714	355.605	292.951	463.833	382.111	0.129173	A16,A34,C15,C18,C26,C38,C41,G17,G25,G35,G39,U27,U36,U40,
	2GV3-G2	2GV3	N/A	7	0.182392	0.444091	259.847	213.486	332.286	273	0.143365	A5,C3,C4,G1,G2,C17,C21,G19,G20,U16,U18,
	2ES5-G2	2ES5	N/A	15	0.187681	0.438	334.267	248.094	427.467	317.267	0.150595	A3,A5,G1,G2,G4,A15,C17,C22,G16,U18,U19,U20,U21,
	1JO7-G3	1JO7	N/A	3	0.195183	1.09473	248.388	214.441	300	259	0.159749	A10,A11,C14,C17,C20,C21,G12,G13,G18,G19,U22,
	6U79-G2	6U79	N/A	4	0.207195	1.39967	440.094	311.659	554.25	392.5	0.16671	A12,A15,A16,A18,C11,C13,C20,C22,G14,G17,U19,U21,
	1FYO-G3	1FYO	N/A	3	0.214142	0.483364	371.111	293.462	447.667	354	0.158774	C3,C6,G1,G2,G4,U5,A21,C24,G22,G25,U23,
	2M24-G2	2M24	N/A	7	0.214825	0.294286	290.435	237.415	353.714	289.143	0.167391	A3,A6,G1,G2,G4,U5,A23,A25,C22,C26,C28,G21,U24,U27,
	1HWQ-G2	1HWQ	N/A	3	0.223838	0.453556	316.948	258.711	393.667	321.333	0.171253	C5,G1,G2,G4,G6,U3,A25,G24,G26,
	1IKD-G2	1IKD	N/A	3	0.224686	0.4141	214.669	218.228	261.333	265.667	0.155059	C5,G1,G2,G3,G4,A13,C15,C17,G14,U16,
	2LI4-G1	2LI4	N/A	12	0.227211	0.510455	248.48	209.764	336.417	284	0.174265	A9,A10,A14,C21,C22,G11,G12,G20,U13,U19,U23,
	2NCI-G2	2NCI	N/A	3	0.232556	0.3659	199.106	188.656	241.333	228.667	0.169701	A11,C14,C17,C20,C21,G12,G13,G18,G19,U15,
	1JP0-G1	1JP0	N/A	11	0.232829	0.922231	302.59	247.917	415.091	340.091	0.186341	C3,C8,G1,G2,G4,G5,G7,U9,C16,C17,C18,G15,G19,
	2LBS-G1	2LBS	N/A	16	0.235783	0.450182	309.251	223.235	468.062	337.875	0.195046	A6,A9,C7,C8,U5,A21,C22,G11,G23,U10,U24,
	1EXY-G2	1EXY	Protein	6	0.245883	0.573429	297.362	247.327	400.167	332.833	0.184575	C6,C7,G5,A19,C20,G21,U18,
	5KH8-G1	5KH8	N/A	16	0.255361	0.311818	222.942	213.42	301.438	288.562	0.183968	A32,C22,C24,C26,C29,G23,G30,G31,G33,U25,U27,
	2LKR-G8	2LKR	N/A	6	0.256122	0.8531	468.471	331.269	628.833	444.667	0.185329	A16,C21,C88,G15,G20,G46,G86,G87,U17,U47,
	2MIY-G3	2MIY	N/A	17	0.261124	0.837333	447.56	316.443	614.824	434.706	0.19638	C1,G4,G5,U2,U3,A21,A24,A25,A33,C20,C22,C23,C34,U18,U19,
	2M8K-G1	2M8K	N/A	16	0.267918	0.565824	488.487	339.906	655.688	456.25	0.202601	C6,G2,U3,U4,U5,U7,U8,A24,A39,C22,C23,G34,U17,U18,U19,U20,U21,
	2HNS-G2	2HNS	N/A	8	0.276784	0.560083	308.728	245.411	422.375	335.75	0.208207	C3,G1,G2,G4,U5,A15,C17,C19,C21,G18,G20,U16,
	2EUY-G2	2EUY	N/A	13	0.276962	0.831333	249.29	208.953	379.846	318.385	0.213708	C3,C4,G1,G2,U5,U6,A28,A29,A30,G31,G32,U33,
	2N7M-G3	2N7M	N/A	5	0.27875	0.585692	462.87	302.1	633.4	413.4	0.229711	A6,C9,G8,U5,U7,A10,A84,C78,C79,C80,C83,G82,U81,
	2NCI-G1	2NCI	N/A	10	0.280244	0.3038	323.469	283.559	432	378.7	0.190275	A3,C4,G1,G2,G5,A23,C24,G25,U22,U26,
	2L2K-G2	2L2K	N/A	9	0.284126	0.38375	352.062	293.528	453.778	378.333	0.19942	G14,A15,A16,U17,C18,C19,U20,G24,G25,A26,U27,C28,
	2KRL-G4	2KRL	N/A	4	0.290672	0.684545	180.816	183.648	239.5	243.25	0.215006	A70,A71,C73,C74,G80,G81,G82,G84,G85,U72,U83,
	2LI4-G2	2LI4	N/A	3	0.294237	0.266556	396.934	313.934	505.333	399.667	0.204837	A3,A7,C4,C5,G6,A25,C27,G29,U26,
	2FEY-G2	2FEY	N/A	7	0.294312	0.997	323.847	241.154	461	343.286	0.230001	A2,A4,C5,G1,G3,A37,C41,G39,U38,U40,U42,
Intermediate flexibility	1E95-G1	1E95	N/A	14	0.296286	0.698462	388.967	310.773	541.143	432.357	0.20953	C2,C5,G1,G3,G4,A13,C11,C12,C16,C17,G14,G15,G18,
	2LUN-G3	2LUN	N/A	3	0.304452	0.338923	368.695	322.608	456	399	0.184695	A5,A9,G6,G8,U7,A19,C12,C18,G11,G16,G17,U10,U20,
	1EKZ-G2	1EKZ	N/A	7	0.30873	1.66564	234.885	191.472	354	288.571	0.236083	A5,C7,G6,G9,U8,A21,A23,C22,G19,G20,U10,
	1R7W-G3	1R7W	N/A	5	0.310773	1.00527	337.22	306.525	470.2	427.4	0.213449	A3,A6,G1,G2,G4,G5,C30,C31,G27,G28,U29,
	1LVJ-G2	1LVJ	N/A	11	0.315353	0.893909	197.017	178.642	305.091	276.636	0.248249	U25,G26,A27,G28,C29,C30,A35,G36,C37,U38,C39,
	1LVJ-G1	1LVJ	N/A	12	0.318726	0.439	384.437	306.355	536.667	427.667	0.231665	C18,C19,A20,G21,A22,C39,U40,C41,U42,G43,G44,G17,
	5IEM-G4	5IEM	N/A	5	0.320991	0.336769	276.96	235.672	367.6	312.8	0.230491	U9,A11,C10,C12,C13,C14,C41,C45,G39,G40,G43,G44,U38,
	2ES5-G1	2ES5	N/A	9	0.32153	0.625923	325.478	244.295	484.222	363.444	0.249188	A3,A5,C8,G4,G6,G7,U9,A15,C10,C14,C17,G13,G16,
	2AHT-G1	2AHT	N/A	20	0.322049	0.570067	467.062	323.58	649.25	449.8	0.244138	A3,C5,G1,G2,G4,G6,G7,A20,C22,C24,C26,G23,U19,U21,U25,
	1YLG-G2	1YLG	N/A	11	0.325129	0.499692	417.257	314.27	607.364	457.455	0.207036	A3,A5,G1,G2,U4,U6,A26,A28,C30,G24,U25,U27,U29,
	2M57-G1	2M57	N/A	8	0.326323	0.616556	250.739	224.009	363.5	324.75	0.235713	A24,C12,C20,C21,C23,G11,G13,G22,U10,
	2HNS-G1	2HNS	N/A	13	0.334281	0.862929	324.599	242.811	498.846	373.154	0.277092	A7,C3,C9,G4,G6,U5,U8,A10,A11,A15,C17,G14,U13,U16,
	1N66-G1	1N66	N/A	15	0.336052	0.702692	333.799	264.209	479.667	379.667	0.241684	A3,C4,C5,G1,G2,A15,C21,G14,G16,G19,U17,U18,U20,
	1P5O-G1	1P5O	N/A	12	0.337997	0.648722	455.043	342.032	720.417	541.5	0.239512	A30,A31,A32,A43,A51,C34,C37,C47,G33,G35,G45,G46,G48,G52,U36,U44,U49,U50,
	5KH8-G3	5KH8	N/A	3	0.344787	0.862857	246.343	213.497	320	277.333	0.259839	U6,A36,A37,A46,C34,C47,U35,
	1A51-G1	1A51	N/A	8	0.35201	0.428846	358.166	270.453	526.25	397.375	0.255937	A78,A94,C93,C97,G76,G79,G81,G96,G98,U77,U80,U82,U95,
	1JTJ-G2	1JTJ	N/A	11	0.353199	0.77575	367.887	286.375	557.182	433.727	0.266176	C1,C5,G4,U2,U3,U6,A16,A21,C17,C20,G18,G19,
	2LDT-G2	2LDT	N/A	6	0.354709	0.672	299.754	249.617	420.5	350.167	0.25934	A8,C9,A17,A22,C12,C13,G10,G11,G14,G18,G19,U20,U21,
	1MNX-G2	1MNX	N/A	6	0.361277	0.365909	251.186	217.34	369.833	320	0.274163	G68,G69,G70,G72,U71,A102,A104,C106,C107,C108,U103,
	2L94-G1	2L94	N/A	10	0.366134	0.477176	500.061	344.859	690.8	476.4	0.272071	A4,A5,A7,G1,G2,G3,G6,A38,C40,C43,C44,C45,G35,G36,U39,U41,U42,
	2LC8-G6	2LC8	N/A	6	0.366782	2.11578	280.419	215.982	443.167	341.333	0.279728	G4,G5,A29,A30,A46,C31,C43,C45,U44,
	2M24-G1	2M24	N/A	19	0.374615	0.744846	401.935	289.465	650.789	468.684	0.271954	A6,G4,G8,U5,U7,U9,A10,A20,A23,A25,C22,G19,G21,
	1OSW-G1	1OSW	N/A	23	0.377034	1.4626	361.37	283.324	585.826	459.304	0.28683	A3,C6,C8,G4,G5,G7,U9,A16,C11,C14,G12,G13,G15,G17,G18,
	1JO7-G2	1JO7	N/A	14	0.379544	0.853	292.823	215.24	470.714	346	0.298999	A4,A6,A7,A8,C9,G5,U3,C24,G23,U22,U25,
	17RA-G1	17RA	N/A	7	0.384821	1.03093	478.14	326.186	717.429	489.429	0.27968	A6,A7,C3,G1,G2,G4,U5,A17,C14,C15,C20,G19,U16,U18,
	1M5L-G4	1M5L	N/A	3	0.388514	0.685	303.364	245.712	401.667	325.333	0.294392	A5,A8,C2,C4,G1,G3,G6,C36,G32,G33,G34,G35,G37,
	2GV3-G1	2GV3	N/A	8	0.390882	1.20058	296.616	226.861	472	361	0.291594	A5,A7,C4,C8,G6,U9,A14,A15,C10,C17,G13,U16,
	2HUA-G1	2HUA	N/A	11	0.394985	0.424455	311.204	264.795	443.182	377.091	0.279696	A8,C4,C6,C7,U5,A31,A32,A36,C33,G34,G35,
	1AUD-G3	1AUD	N/A	18	0.396712	0.8141	195.48	170.273	344.667	300.222	0.298241	A22,A24,C21,C45,C46,C49,G19,G20,G23,G48,U47,
	1IKD-G1	1IKD	N/A	15	0.397377	0.946154	444.104	308.611	712.133	494.867	0.29266	C5,C7,G1,G2,G3,G4,U6,A13,C15,C17,G12,G14,U16,
	2FDT-G2	2FDT	N/A	11	0.401036	0.410059	476.238	321.335	788.727	532.182	0.295233	A7,G1,G2,G5,U3,U4,U6,A34,C29,C32,C35,C36,G27,G31,G33,U28,U30,
	1BVJ-G1	1BVJ	N/A	16	0.404772	1.23089	487.826	329.68	760.562	514	0.304396	A5,C3,C6,G1,G2,G4,G7,G8,U9,A14,A15,A16,C18,C20,C22,G10,U17,U19,
	2KRL-G3	2KRL	N/A	4	0.405597	1.2481	324.264	274.513	456.25	386.25	0.27445	A42,A43,A44,C97,C98,G57,G58,G59,U99,C100,
	2LUN-G1	2LUN	N/A	5	0.407673	0.8993	379.13	278.795	580.4	426.8	0.313921	C4,G1,G2,G3,A21,A24,C23,C26,G25,U22,
	1R7W-G2	1R7W	N/A	12	0.410311	0.8781	219.686	179.774	379.333	310.417	0.306016	A15,C14,C16,C23,C24,G17,G25,G27,U13,U26,
	1R2P-G1	1R2P	N/A	8	0.414	0.679154	309.872	256.959	489	405.5	0.270406	A13,A17,A18,C11,C21,C23,G10,G12,G15,G19,G22,U14,U20,
	1AUD-G6	1AUD	N/A	3	0.415794	0.594	195.548	171.105	285.333	249.667	0.33008	A22,A24,C21,C45,C46,C49,G19,G20,G23,G48,U47,
	1E95-G2	1E95	N/A	6	0.416642	1.44933	205.155	178.893	325.5	283.833	0.315787	A7,C5,C6,G4,G8,A25,A26,C24,U27,
	2M57-G2	2M57	N/A	12	0.431542	1.35173	254.187	198.115	443.5	345.667	0.327694	C5,C6,G4,G7,A28,C25,C29,G26,G30,G31,U27,
	1P5M-G1	1P5M	N/A	15	0.432449	0.957429	316.767	233.456	567.8	418.467	0.336887	A8,C3,G2,G5,G7,U4,A52,C47,C48,C50,C51,G46,G53,U49,
	2KZL-G1	2KZL	N/A	5	0.433284	0.175333	150.322	131.324	253.2	221.2	0.426048	A11,A15,A46,C45,G10,G14,U12,U13,U44,
	6SDW-G1	6SDW	Protein	19	0.435061	0.443857	357.68	255.964	646.105	462.368	0.313304	A6,A7,C9,G8,A21,A25,C12,C13,C24,G11,G22,G23,G26,U10,
	1QWB-G1	1QWB	N/A	12	0.440145	0.871077	416.337	327.213	547.333	430.167	0.171127	A3,A5,C4,C6,G2,G7,A20,G18,G21,G23,U19,U22,U24,
	2KHY-G1	2KHY	N/A	11	0.440806	0.854167	394.36	289.829	586.818	431.273	0.333691	A4,A7,C6,G1,G2,G3,U5,A32,A34,C31,G33,U35,
	1FYO-G2	1FYO	N/A	4	0.443602	0.9077	257.701	204.284	377.5	299.25	0.352999	A9,C6,C8,G7,C10,C11,G15,G16,G17,U18,
	1E4P-G2	1E4P	N/A	10	0.458166	0.677667	210.085	171.048	363.8	296.2	0.368204	C4,G1,G3,G5,U2,A20,C22,G19,G21,
	1QC8-G2	1QC8	N/A	7	0.464094	1.2345	334.119	249.668	531.286	397	0.359408	A4,C3,G1,G2,G5,U6,A19,A21,C18,C20,C22,G23,U17,U24,
	6XXA-G1	6XXA	N/A	10	0.479866	0.781643	416.1	300.52	640.1	462.3	0.344213	C5,C6,G1,G2,G4,U3,U7,A15,A19,C18,C20,G16,G17,U14,
	1S9S-G9	1S9S	N/A	6	0.487127	0.917636	211.379	162.457	379.5	291.667	0.401814	A362,C357,C368,G359,G360,G361,G363,G365,G366,U358,U367,
	2N6W-G1	2N6W	N/A	4	0.487445	0.639	314.488	239.451	471.5	359	0.366442	A23,A25,A26,C39,C42,C43,U24,U27,U40,U41,
	1TJZ-G2	1TJZ	N/A	3	0.490155	0.67225	272.603	234.855	402	346.333	0.346666	A9,A17,C10,C12,C13,C20,C22,G11,G14,G18,G19,G21,
	1AUD-G2	1AUD	N/A	5	0.49782	0.943615	353.579	255.642	576.2	416.6	0.406993	A22,A24,C27,C28,C33,G23,G34,G35,G36,G48,U26,U29,U47,
	2N0R-G1	2N0R	N/A	6	0.499004	1.6672	269.965	215.726	438.833	350.667	0.360034	C7,C9,G6,U8,A12,A13,A15,C17,G14,G16,
	2FEY-G3	2FEY	N/A	5	0.509407	1.0916	284.149	236.963	440.8	367.6	0.367143	C9,A11,A13,A32,A33,C12,G10,G35,G36,U34,
	6IZP-G1	6IZP	N/A	6	0.514627	0.668625	137.678	139.499	226.833	229.833	0.38511	G1,U2,A3,C4,A24,A25,G26,U27,
	1HWQ-G1	1HWQ	N/A	12	0.514982	1.60327	353.435	258.923	634.167	464.583	0.37177	A7,A8,G6,G9,C12,C18,C20,C21,C22,C23,G10,G11,G19,G24,U17,
	2EUY-G1	2EUY	N/A	15	0.515379	1.066	369.673	265.776	651.6	468.467	0.382604	G8,G9,A10,A11,A12,A14,C13,C20,C25,C26,G19,G22,G24,U21,U23,
	1A9L-G1	1A9L	N/A	12	0.520246	0.719308	235.452	182.392	437.833	339.167	0.398518	A6,G1,G2,G3,G5,U4,A32,A35,C34,C36,C37,C38,U33,
	1E4P-G1	1E4P	N/A	13	0.520799	1.04671	296.124	238.439	494	397.769	0.350929	A6,A7,A9,C4,G5,G8,A14,C10,C17,C18,G11,G15,G19,U16,
	2N82-G2	2N82	N/A	4	0.539493	1.64475	257.154	206.331	465.5	373.5	0.478221	A22,A34,A39,C35,C37,G19,G20,G23,G33,U21,U24,U36,
	2LKR-G6	2LKR	N/A	7	0.540713	1.62483	349.566	272.077	577.429	449.429	0.374087	A4,A5,A7,C3,C8,G2,U6,A102,A105,G103,U104,U106,
	6VAR-G3	6VAR	N/A	7	0.541586	1.03129	239.974	211.411	427.286	376.429	0.376122	A21,C23,C36,C37,G22,U15,U38,
	1B36-G1	1B36	N/A	5	0.54587	1.06693	426.394	278.274	716.8	467.8	0.390816	A6,C5,G1,G2,G4,G7,U3,A32,A36,C33,C35,C37,C38,G34,U31,
	2N82-G3	2N82	Protein	3	0.548448	1.53389	296.976	249.182	455.667	382.333	0.400155	A31,A34,C30,C35,G28,G33,U25,U26,U27,
	2N7M-G2	2N7M	N/A	9	0.550154	0.598167	348.866	268.945	620.333	478.222	0.38626	A66,A67,A70,C58,C69,G57,G60,G61,G63,U59,U62,U68,
	1D6K-G2	1D6K	Protein	12	0.55094	1.17607	339.431	267.966	561.25	443.083	0.37795	U277,A278,G279,U280,G281,U282,C283,C291,G292,G293,A294,U295,G296,C297,G298,
	1P5M-G3	1P5M	N/A	16	0.553077	1.21538	253.506	198.271	494.812	387	0.418736	A8,G5,G7,G9,U6,A11,A12,A45,C44,C47,C48,G10,G46,
	2N6W-G2	2N6W	N/A	6	0.556834	0.518625	193.999	157.302	344.5	279.333	0.451112	A26,A29,A38,C39,G30,G37,U27,U28,
	2LDT-G1	2LDT	N/A	13	0.558339	0.854467	400.739	267.499	726.923	485.231	0.420383	A5,A8,G1,G2,G3,G4,G6,U7,A24,A25,C26,C28,C29,C30,U27,
	1JO7-G1	1JO7	N/A	22	0.563538	1.416	287.349	224.89	555	434.364	0.420517	A8,C9,A10,A11,C14,C17,C20,C21,G12,G13,G18,G19,U22,
	1P5O-G2	1P5O	N/A	8	0.577059	0.6214	230.117	179.989	440.125	344.25	0.433092	C3,G2,G5,U4,A74,C69,C70,C72,C73,U71,
	1TJZ-G1	1TJZ	N/A	8	0.585143	1.48315	394.425	289.071	677.625	496.625	0.407704	A9,G5,G6,G8,U7,A23,C10,C20,C22,G11,G18,G19,G21,
	1B36-G2	1B36	N/A	6	0.589842	1.16433	363.063	257.712	651.333	462.333	0.437021	A9,A10,A12,C11,C14,C22,C24,G13,G15,G21,G23,G25,
Flexibility	1HWQ-G3	1HWQ	N/A	3	0.595952	1.61508	236.408	192.999	370.333	302.333	0.476236	A7,A8,G6,G9,C20,C21,C22,C23,G10,G19,G24,U17,
	2MTK-G3	2MTK	N/A	3	0.597784	0.648	315.41	256.993	473.333	385.667	0.42846	A3,C4,C5,C7,C8,G2,U6,C23,G21,G24,U22,
	1TJZ-G3	1TJZ	N/A	3	0.605291	1.12225	215.767	180.084	344.667	287.667	0.466847	A9,G5,G6,G8,U7,C10,C20,C22,G11,G18,G19,G21,
	1JTJ-G1	1JTJ	N/A	8	0.610439	1.04221	450.6	339.471	685.25	516.25	0.280622	C5,G4,U2,U3,U6,A12,A16,A21,C11,C17,C20,G10,G18,G19,
	2N2P-G1	2N2P	N/A	4	0.615161	0.94125	170.54	159.445	280.5	262.25	0.454555	A3,G5,U4,U6,A16,A17,A18,C19,
	1LDZ-G1	1LDZ	N/A	18	0.630114	1.0494	367.738	271.269	745.667	550.056	0.418888	A8,G9,A12,A18,C10,C11,C14,G13,G15,G19,G22,G23,G24,U20,U21,
	1SCL-G1	1SCL	N/A	4	0.640683	0.291455	232.034	194.234	399	334	0.465235	G1,G2,G3,G5,U4,A26,C25,C27,C28,C29,G24,
	2LKR-G7	2LKR	N/A	3	0.641066	1.24375	149.734	158.893	250.667	266	0.49663	A13,C88,G15,G86,G87,U14,U99,G100,
	6NOA-G2	6NOA	N/A	3	0.651467	1.24831	378.652	267.058	624.333	440.333	0.499241	A113,A114,A115,A120,C112,C117,C125,U116,U118,U119,U123,U124,U126,
	2LU0-G7	2LU0	N/A	3	0.653448	0.938364	445.834	346.966	720	560.333	0.444603	A12,A13,A23,A26,C11,C25,C34,G27,G33,U24,U35,
	1A60-G1	1A60	N/A	17	0.671539	1.37715	253.775	211.513	509.706	424.824	0.450515	A4,G1,G2,G3,C11,C13,C15,C16,C17,G32,U12,U14,U33,
	2N3Q-G2	2N3Q	N/A	4	0.677657	0.798083	242.34	218.387	409.75	369.25	0.460684	A11,A15,A25,A27,C12,C14,C16,C22,G21,G23,U13,U24,
	1ANR-G2	1ANR	N/A	3	0.694867	1.52907	282.146	231.515	460.667	378	0.488604	A27,C24,C29,C30,C37,C39,G26,G28,G33,G34,G36,U25,U31,U38,
	2N82-G4	2N82	N/A	3	0.706086	0.854417	236.745	216.672	381.333	349	0.481811	A22,A39,C35,C37,G19,G20,G23,U21,U24,U25,U36,U38,
	1TOB-G3	1TOB	N/A	3	0.707066	1.46807	360.137	255.744	618.667	439.333	0.534801	A4,A7,C3,C5,G1,G2,G6,G8,A17,A19,C15,C18,C20,C22,U21,
	1Z31-G2	1Z31	N/A	6	0.743989	0.828385	233.713	180.192	486.167	374.833	0.558366	A269,A289,C262,C265,C266,C267,C270,C288,G263,G264,G285,G286,U287,
	1NYB-G1	1NYB	Protein	10	0.745686	1.70856	493.005	317.504	977.3	629.4	0.513807	A6,C5,C7,C8,G1,G2,U3,U4,U9,A21,C10,C14,C15,G16,G17,G18,G20,U19,
	1LDZ-G2	1LDZ	N/A	8	0.752744	0.959714	324.124	240.346	578.875	429.25	0.44988	A4,C2,C5,C6,G1,G3,A25,C28,C30,G23,G24,G26,G29,U27,
	2N3Q-G5	2N3Q	N/A	3	0.758391	0.5625	271.654	219.383	474.667	383.333	0.54614	A3,C2,C5,G1,G4,C56,C58,G57,G60,U59,
	1BVJ-G2	1BVJ	N/A	3	0.7618	0.649727	215.401	166.735	349.667	270.667	0.506236	A5,C3,G1,G2,G4,C18,C20,C22,G21,U17,U19,
	1D6K-G1	1D6K	N/A	8	0.767261	1.15283	180.08	151.824	380	320.375	0.549698	G267,G268,A269,C270,C271,G272,G302,U303,A304,G305,G306,U307,
	2QH2-G1	2QH2	N/A	18	0.785743	0.415667	316.613	276.324	512.556	447.333	0.516785	A3,C7,C8,G2,G4,G6,U5,U9,A20,C19,C21,G15,G17,G18,U16,
	1AUD-G4	1AUD	N/A	15	0.802658	1.80214	296.492	216.114	697.667	508.533	0.56663	A22,A24,C21,C27,C28,C33,G23,G34,G35,G36,G48,U26,U29,U47,
	1R2P-G2	1R2P	N/A	3	0.803104	0.9106	182.3	164.736	328.667	297	0.58734	A2,C4,C5,G1,G3,C29,G30,G31,U32,U33,
	1JUR-G2	1JUR	N/A	3	0.814014	0.662857	439.786	319.931	769.333	559.667	0.557734	A7,C3,C4,G1,G2,G6,G8,U5,A16,A19,C13,C15,G17,U14,
	2LKR-G9	2LKR	N/A	4	0.817962	1.08991	276.184	229.316	508.25	422	0.566637	A51,C75,G46,U48,U49,U50,U74,U76,U77,U78,U85,
	2LUN-G2	2LUN	N/A	3	0.81861	0.969667	373.507	267.662	694	497.333	0.612495	A5,A9,C4,G6,G8,U7,A19,A21,C18,C23,U20,U22,
	6SDW-G2	6SDW	Protein	7	0.822713	1.1454	124	105.704	300.143	255.857	0.672138	A4,C3,G1,G2,C30,G32,U27,U28,U29,U31,
	2MIY-G1	2MIY	N/A	11	0.840126	1.51525	231.898	175.393	588.364	445	0.609784	A33,A35,C34,C36,C38,C45,C46,C48,C49,G37,G47,U32,
	2N82-G1	2N82	Protein	18	0.840786	1.83846	455.238	322.319	945.278	669.278	0.566766	A31,A34,C30,C35,C37,G29,G33,U24,U25,U26,U27,U32,U36,
	1P5M-G4	1P5M	N/A	3	0.845227	0.843	325.551	266.039	585.333	478.333	0.577948	G5,G7,U4,U6,A45,C20,C44,G18,G43,G46,U19,
	2N8V-G2	2N8V	N/A	6	0.871694	1.42207	354.593	344.785	674.833	656.167	0.485034	A3,A4,G2,A23,A57,A58,A59,A61,A64,C24,C62,C63,G56,U22,U60,
	1M5L-G2	1M5L	N/A	8	0.882477	0.806333	268.75	196.989	617	452.25	0.646369	A8,C9,A28,A31,C11,C29,G12,G30,U10,
	2N3Q-G4	2N3Q	N/A	3	0.98747	1.35722	197.328	162.448	341.333	281	0.542653	A6,G7,G8,G9,A32,A33,C30,G29,U31,

## Sheet: Medium
Class	Pocket group ID	PDB ID	Binding type	Nmunber of pockets	Flexibility score (Q)	RMSF (Å)	Overlapping volume (Å3)	Overlapping surface area (Å2)	Average volune (Å3)	Average surface area (Å2)	S /`P	Overlapping nucleotides
Rigidity	5KH8-G2	5KH8	N/A	20	0.0443935	0.253733	707.779	429.878	766.1	465.3	0.0352988	C3,G1,G2,G4,G7,G8,U9,A40,C13,G10,G14,G39,U11,U12,U38,
	1S9S-G1	1S9S	N/A	20	0.0605601	0.345286	602.376	404.254	669.35	449.2	0.0484099	A314,A341,A343,C315,C316,C317,C342,C344,C345,C346,G318,G320,G321,U319,
	5IEM-G1	5IEM	N/A	10	0.0639778	0.255571	1395.75	805.582	1516.2	875.1	0.044527	A4,C6,G1,G2,G3,G8,U5,U7,U9,A47,C45,C50,C55,C56,G48,G49,G51,G52,G53,U46,U54,
	5KMZ-G1	5KMZ	N/A	10	0.0745812	0.212308	537.12	387.797	582	420.2	0.0555091	A2,A3,C4,C5,U6,A12,A13,A16,G17,G18,U14,U15,U19,
	7DD4-G2	7DD4	N/A	7	0.0771484	0.281	627.472	444.564	680.714	482.286	0.0438849	C5,C7,C9,G3,U4,U6,U8,A17,A18,G13,G14,G15,G16,
	6MCF-G2	6MCF	Protein	4	0.0803702	0.346714	1280.73	765.547	1395.25	834	0.0568006	A39,A43,A52,C36,C37,C38,C45,C47,C48,C62,C67,G42,G46,G49,G60,G61,G64,U40,U41,U44,U63,
	2L5Z-G1	2L5Z	N/A	21	0.086994	0.517056	1059.06	625.06	1188.05	701.19	0.0610926	A2,C4,G1,G3,G6,G9,U5,A11,A20,C10,C21,C24,G17,G19,G22,G23,U18,U25,
	2KX8-G2	2KX8	Ligand	10	0.0892556	0.414294	834.9	566.656	943.7	640.5	0.0595655	A301,A310,A317,C304,C306,C309,C316,C320,G302,G303,G305,G308,G314,G315,G318,U307,U319,
	1K5I-G1	1K5I	N/A	10	0.0898498	0.394	1270.3	754.34	1422.3	844.6	0.0570083	A3,C4,C5,C6,G1,G2,G7,G8,G9,A14,C10,C15,C16,C22,C23,G18,G19,G20,U11,U17,U21,
	2KX8-G1	2KX8	N/A	10	0.0949407	0.404217	1410.1	798.351	1558.2	882.2	0.0608047	A296,A297,A298,A301,C320,C323,C324,C328,C332,C333,G293,G294,G295,G300,G322,U299,U321,U325,U326,U327,U329,U330,U331,
	2FY1-G1	2FY1	Protein	17	0.0975543	0.385941	817.027	564.307	956	660.294	0.0649653	A111,A118,A123,A125,C112,C116,C117,C124,C128,G109,G110,G114,G122,G126,U113,U115,U127,
	2L1V-G1	2L1V	N/A	20	0.102161	0.5584	946.64	541.37	1110.1	634.85	0.077735	A3,A5,G2,G4,G6,G7,A18,C19,C20,C21,C23,G13,U14,U15,U22,
	2K95-G1	2K95	N/A	20	0.103155	0.515947	762.946	551.795	901.15	651.75	0.0710364	C96,G93,G94,G95,G98,U97,U99,A111,A117,A174,A175,C112,C116,C119,G118,U100,U113,U114,U115,
	2LA5-G1	2LA5	Protein	10	0.107102	0.595462	753.07	462.515	894.7	549.5	0.0801091	G1,C2,U3,G4,C5,A17,G18,U28,G29,C30,G31,C32,A33,
	6W3M-G2	6W3M	N/A	6	0.107239	0.156692	568.84	384.483	661.333	447	0.0818202	G1,G2,U3,U4,U5,A33,A34,A35,A38,A39,C40,G37,U36,
	1K6G-G1	1K6G	N/A	20	0.108038	0.735591	1150.02	697.164	1347.7	817	0.0749602	A7,C3,C6,G1,G2,G4,G9,U5,U8,A10,A15,C13,C14,C19,C21,C22,G11,G17,G18,G20,U12,U16,
	2LC8-G5	2LC8	N/A	7	0.112573	0.417579	517.749	357.484	612.429	422.857	0.0879598	A8,C7,G9,U6,A14,A29,A30,C13,C24,C25,C26,C31,C32,C33,G10,G11,G28,U12,U27,
	5KQE-G1	5KQE	N/A	20	0.122527	0.86225	988.474	626.774	1149.85	729.1	0.082205	A11,A12,A26,A27,A28,C13,C19,C22,C25,C29,G14,G18,G23,G24,U10,U15,U16,U17,U20,U30,
	2JSE-G1	2JSE	N/A	10	0.125849	0.73	884.891	546.982	1054.3	651.7	0.0892199	A3,C8,C9,G1,G2,G4,G6,G7,U5,A13,A17,C16,C19,C21,G10,G14,G15,U18,U20,
	6GZK-G1	6GZK	N/A	10	0.139035	0.359312	677.74	541.051	784.4	626.2	0.0851786	A6,C7,G5,G9,A10,A11,A17,C12,C13,C44,G14,G18,G19,G45,U20,U21,
	1BYJ-G1	1BYJ	Ligand	38	0.14437	0.419222	1194.48	727.691	1422	823	0.103485	A7,C3,C6,C8,G1,G2,G4,U5,A20,A21,C24,C26,G17,G19,G22,G25,U18,U23,
	2KRL-G1	2KRL	N/A	10	0.146855	0.95355	1135.13	632.731	1404.9	783.1	0.105546	A31,A47,C23,C26,C30,C45,C51,C97,C98,G25,G29,G48,G50,G57,U24,U32,U46,U49,U52,U99,
	1G70-G1	1G70	Protein	14	0.14903	0.954682	1320.58	725.941	1594.07	876.286	0.107432	A52,A68,A73,C44,C49,C51,C54,C69,C74,G41,G42,G46,G47,G48,G63,G64,G67,G71,U43,U45,U66,U72,
	1BIV-G1	1BIV	Protein	5	0.151919	0.855895	880.52	530.344	1040	626.4	0.107413	C6,C8,G9,U7,A13,A21,A28,C15,C23,C25,C26,G11,G14,G22,G27,U10,U16,U20,U24,
	1Z2J-G2	1Z2J	N/A	17	0.152221	0.665556	1050.1	626.265	1301.76	776.353	0.103196	A4,A5,A7,G1,G2,G3,G6,U8,A37,A38,C40,C43,C44,G35,G36,U39,U41,U42,
	1T4L-G1	1T4L	N/A	15	0.158698	0.600062	771.64	468.534	965.867	586.467	0.129427	A4,A6,C7,G1,G2,G3,U5,A28,C30,G23,G25,G26,U24,U27,U29,U31,
	2N7X-G1	2N7X	N/A	20	0.167639	0.797353	856.541	539.718	1057.35	666.25	0.116278	A22,A34,A39,C35,C37,C40,G19,G20,G23,G33,U21,U24,U25,U26,U32,U36,U38,
	1S34-G1	1S34	N/A	15	0.168472	0.7377	1022.52	598.214	1280.6	749.2	0.118788	A305,A353,A354,C355,G276,G277,G309,G310,U306,U308,U375,U376,G298,G361,G363,G365,G366,U287,U296,U367,
	2NC1-G2	2NC1	N/A	10	0.17068	0.3164	1401.9	876.096	1683.7	1052.2	0.106285	A691,A697,A699,C694,C695,C696,C726,C776,G689,G690,G693,G698,G700,G728,G729,G730,G731,U692,U725,U727,
	1K6H-G1	1K6H	N/A	20	0.170772	0.659824	837.793	545.349	1042.5	678.6	0.107118	C3,C9,G1,G2,G4,G6,U5,U7,U8,A15,A16,C17,C19,C21,G14,G18,G20,
	1ULL-G2	1ULL	Protein	5	0.175445	1.03069	936.204	583.127	1123.2	699.6	0.122045	A7,C3,C8,G5,G6,U4,A21,A26,A28,A29,A30,C22,C31,G24,G27,U23,
	2KTZ-G1	2KTZ	Ligand	10	0.176488	0.298714	824.736	470.938	1075.1	613.9	0.13916	C15,C18,C19,C22,C27,G13,G23,G24,G25,U14,U16,U17,U20,U26,
	6GZK-G2	6GZK	Ligand	10	0.17843	0.542941	654.376	445.128	776.5	528.2	0.127067	G2,A3,C4,G5,A6,C7,U24,G25,G26,C27,G35,C36,A37,G38,A39,G40,G41,
	2MIY-G2	2MIY	N/A	18	0.18196	1.08079	597.16	398.775	777.778	519.389	0.140898	C8,G5,G7,U6,U9,A11,C13,C16,G12,U10,U14,U15,U17,U18,
	2M22-G1	2M22	N/A	20	0.184298	0.826857	1009.68	656.435	1249.8	812.55	0.117859	A4,A6,C3,C8,G1,G2,G5,U7,U9,A13,A15,A17,A18,C19,C22,G10,G16,G21,U11,U14,U20,
	6VAR-G2	6VAR	N/A	10	0.184575	1.03129	563.711	376.817	744.4	497.6	0.141712	A20,A21,C19,C23,C24,C46,G22,G40,G41,G42,G44,G45,U43,U47,
	2KD8-G1	2KD8	N/A	12	0.185013	0.7464	927.03	569.449	1181.75	725.917	0.130168	A3,G1,G2,G5,G6,G9,U4,U7,U8,A15,A19,C17,C18,C21,G10,G12,G16,U13,U14,U20,
	2GIO-G1	2GIO	N/A	20	0.190497	0.543926	1482.85	922.431	1750.3	1088.8	0.116856	A5,C3,C4,C7,G1,G2,U6,U8,U9,A19,A22,C11,C13,C16,C28,G10,G17,G18,G20,G21,G26,G27,U12,U14,U23,U24,U25,
	2MQT-G3	2MQT	N/A	9	0.191477	0.304933	602.154	400.471	762.333	507	0.144727	A111,A115,A143,C138,C142,G112,G114,G136,U113,U116,U117,U137,U139,U140,U141,
	2LBS-G2	2LBS	N/A	14	0.204943	0.418588	707.659	420.863	969.714	576.714	0.150821	A4,A6,C7,C8,G1,G2,G3,U5,A28,C30,G23,G25,G26,U24,U27,U29,U31,
	2FDT-G1	2FDT	N/A	11	0.210779	0.715167	852.772	481.533	1142.91	645.364	0.168421	C8,G9,A21,A22,A23,A24,C11,C13,C26,G12,G17,G18,G25,U10,U14,U15,U16,U20,
	2KE6-G2	2KE6	N/A	12	0.212223	0.642783	1199.7	769.657	1526.67	979.417	0.142077	A7,C3,G1,G2,G6,U4,U5,U8,U9,A37,A39,A40,A41,A44,A45,C35,C38,C47,G10,G46,U36,U42,U43,
	2JYM-G1	2JYM	N/A	15	0.226634	0.739294	815.356	517.938	1015.07	644.8	0.150978	A8,C3,C5,C7,G1,G2,G6,U4,A19,C15,C22,G17,G18,G20,U14,U16,U21,
	2HUA-G2	2HUA	N/A	11	0.232144	0.477579	696.411	551.997	883.364	700.182	0.142996	A8,G9,A24,A27,A30,A31,A32,C10,C13,C16,C25,C29,G11,G14,G15,G22,G23,G28,U26,
	2M5U-G1	2M5U	N/A	15	0.233959	0.708875	627.258	454.999	799.4	579.867	0.136292	A4,A6,C3,G2,G5,U7,U8,A15,A16,C18,G12,G14,G20,U13,U17,U19,
	2KE6-G1	2KE6	N/A	12	0.2356	0.958708	1406.45	890.575	1804.83	1142.83	0.137598	U9,A12,A18,A19,A20,A30,A31,A32,A33,A34,C27,C35,G10,U11,U13,U14,U15,U16,U17,U21,U25,U26,U28,U29,
	7LVA-G2	7LVA	N/A	8	0.266734	0.7081	1435.51	790.303	1876.12	1032.88	0.180961	A214,A215,A216,A220,A222,C125,C127,C218,C219,C224,G123,G124,G129,G130,G217,G221,G223,U126,U128,U131,
	2LKR-G1	2LKR	N/A	9	0.270346	1.50791	1267.87	707.242	1733.33	966.889	0.186819	A9,A11,A13,A16,A91,A93,A96,A97,C88,C95,G10,G12,G15,G92,G98,U14,U17,U89,U90,U94,U99,U101,
	1NEM-G1	1NEM	Ligand	9	0.292839	1.08314	551.62	361.846	740.889	486	0.219183	G4,G5,A6,C7,U8,A16,G18,U19,U20,U21,A22,G23,U24,C25,
	1S9S-G4	1S9S	N/A	18	0.293754	0.3434	737.328	491.181	1067.06	710.833	0.199071	A325,A326,A332,A333,C327,G321,G323,G324,G329,G334,G338,U322,U328,U335,U336,
Intermediate flexibility	2LKR-G3	2LKR	N/A	9	0.303222	0.9412	748.925	570.446	993.556	756.778	0.185936	A35,A36,A39,A42,A43,C26,C27,C28,C29,C44,G23,G31,G37,G38,G41,U24,U25,U30,U34,U40,
	6SNJ-G1	6SNJ	Protein	16	0.321177	0.4728	902.313	533.426	1372.69	811.5	0.225774	A94,C98,C99,G91,G92,G93,U95,U96,U97,A111,A112,A113,C114,C116,C117,G108,G109,G110,U107,U115,
	1QC8-G1	1QC8	N/A	11	0.332095	1.60821	530.162	365.338	821.091	565.818	0.268298	A4,G1,G5,G7,G9,U6,U8,A10,A19,A21,C18,C20,U16,U17,
	6HAG-G2	6HAG	Ligand	10	0.341895	0.670571	681.536	449.084	1038.2	684.1	0.226655	A4,A6,A7,C3,C5,C8,G9,A18,C14,C15,G17,U12,U13,U16,
	484D-G1	484D	Protein	21	0.342344	1.61458	568.306	362.701	907.667	579.286	0.258017	G1,G2,U3,G4,U5,C6,U7,U8,G10,A11,G12,G17,A18,U19,C20,G21,G22,A23,C24,
	2KDQ-G1	2KDQ	Protein	10	0.353157	0.966	1407.24	902.534	1803.7	1156.8	0.151374	G17,G18,C19,A20,G21,A22,U23,C24,G26,A27,G28,C29,C30,G32,G33,G34,A35,G36,C37,U38,C39,U40,C41,U42,G43,
	2N8V-G3	2N8V	N/A	4	0.357147	0.706562	819.051	495.727	1115.25	675	0.25531	A28,A34,A42,A44,C31,C41,C43,C47,G29,G32,G46,G48,U30,U33,U35,U45,
	2FEY-G1	2FEY	N/A	10	0.362505	0.790333	520.186	384.047	772.6	570.4	0.228274	A18,A20,A29,A32,C31,G17,U15,U16,U19,U27,U28,U30,
	6IZP-G2	6IZP	Ligand	8	0.366452	0.973643	505.627	396.547	740.5	580.75	0.256177	G6,G7,A8,A9,C10,A11,C17,A18,U19,G20,U21,G22,G23,A24,
	1S9S-G3	1S9S	N/A	15	0.373899	0.4141	698.508	433.136	1026.2	636.333	0.269535	A353,A354,A371,C349,C350,C352,C355,C356,C357,C368,C369,C370,G310,G351,G372,G373,G374,U358,U375,U376,
	6GBM-G1	6GBM	Protein	20	0.382094	0.569786	508.376	350.239	776.05	534.65	0.250886	A4,A6,C3,G1,G2,G5,A17,C15,C22,G21,U16,U18,U19,U20,
	1YLG-G1	1YLG	N/A	19	0.395459	1.44159	846.114	557.631	1409.53	928.947	0.250687	A5,A7,G9,U6,U8,A10,A12,A20,A23,C13,C22,G19,G24,U11,U17,U18,U21,
	2LWK-G1	2LWK	Ligand	13	0.404945	0.685154	1474.57	767.083	2474.31	1287.15	0.266652	A2,A5,A7,A8,A9,G1,G3,G6,U4,A11,A12,C10,C21,C22,C25,C31,G13,G14,G20,G24,G30,U23,U26,U27,U28,U29,
	1EI2-G1	1EI2	Ligand	14	0.405968	1.45911	745.823	476.75	1086.36	694.429	0.264558	G1,G2,C3,A4,G5,U6,G7,U8,G9,A10,U16,U17,C18,A19,C20,A21,C22,G23,U24,
	2MTK-G2	2MTK	N/A	15	0.406238	1.50618	1041.17	624.197	1562.93	937	0.262421	A3,C4,C5,C7,C8,C9,G2,U6,A18,C12,C13,C19,C23,G10,G16,G17,G20,G21,U11,U14,U15,U22,
	1R7W-G1	1R7W	N/A	15	0.411456	0.990857	567.803	385.866	950.2	645.733	0.26982	A3,A6,A8,C7,G1,G2,G4,G5,C30,C31,G27,G28,U29,U32,
	2ESE-G1	2ESE	N/A	21	0.418219	0.776389	705.855	435.858	1002.6	619.095	0.308011	G524,G525,A526,G527,A528,G529,G530,C531,G536,C537,A538,G539,C540,U541,U542,U543,U544,C545,
	1FMN-G1	1FMN	Ligand	4	0.425736	1.26118	698.43	437.788	1014.25	635.75	0.309597	A8,C3,G1,G2,G4,G6,G9,U5,U7,A25,A26,A29,A31,C30,C32,G27,G28,
	1LDZ-G3	1LDZ	N/A	6	0.427173	1.54941	738.55	435.223	1120.83	660.5	0.30336	A4,A8,C2,C5,C6,G3,G7,G9,A25,C10,C11,G19,G22,G23,G24,U20,U21,
	2MTK-G1	2MTK	N/A	20	0.439323	2.36491	1205.06	624.207	2058.35	1066.2	0.316893	A3,C4,G1,G2,A25,A30,A31,C23,C27,C33,C45,C46,G24,G26,G28,G32,G42,G43,U34,U35,U41,U44,
	5LWJ-G1	5LWJ	N/A	11	0.445147	0.54695	745.115	475.377	1005	641.182	0.320914	A4,A8,C3,C6,C7,G1,G2,G5,G9,A10,A26,A27,C25,C30,G24,G28,G29,G32,U31,U33,
	1MFK-G1	1MFK	N/A	21	0.446259	1.12143	686.941	441.695	1013.57	651.714	0.29895	C3,C9,G1,G2,G4,G5,G8,U6,U7,A10,A18,C14,C17,C19,C20,C22,G11,G16,G21,U13,U15,
	1MT4-G1	1MT4	N/A	20	0.463627	0.988	741.437	465.065	1059.55	664.6	0.333012	A6,A7,C3,C8,G1,G2,G4,G9,U5,A14,A15,A16,A20,C21,G17,G22,U10,U18,U19,
	2KRL-G2	2KRL	N/A	10	0.480186	0.978857	850.501	563.31	1298.3	859.9	0.305413	A61,A62,A65,A95,C63,C64,C66,C87,C96,G57,G58,G59,G89,G91,G92,G94,U56,U60,U88,U90,U93,
	2N3Q-G1	2N3Q	N/A	18	0.483764	1.84784	1013.16	575.601	1844.35	1047.82	0.314666	A3,A6,C2,C5,G4,G7,G8,G9,A10,A46,A49,A52,C30,C48,C50,C54,C55,C56,C58,G28,G29,G47,G53,G57,U59,
	2MQT-G2	2MQT	N/A	10	0.487531	0.715333	722.774	453.054	1211.5	759.4	0.330236	G99,C103,C105,C106,C108,G100,G101,G110,G147,G148,G149,G150,U102,U104,U109,U144,U145,U146,
	1EKZ-G1	1EKZ	N/A	36	0.502607	2.41465	762.147	446.03	1338.56	783.361	0.358937	A3,A5,C4,C7,G1,G2,G6,G9,U8,A21,A23,C22,C25,G19,G20,G24,G27,U10,U26,U28,
	1P5M-G2	1P5M	N/A	21	0.515002	1.23142	943.111	600.993	1551.62	988.762	0.324879	A15,A24,A35,C16,C20,C23,C25,C27,C40,C44,G18,G26,G33,G34,G36,G38,G41,G43,U14,U17,U19,U21,U22,U37,U39,U42,
	2M58-G1	2M58	N/A	11	0.517272	0.98	1002.54	596.957	1579.73	940.636	0.352173	GTP1,A3,A4,A6,A7,A8,G2,G5,G9,A20,A24,A25,A26,C18,C19,C21,C23,G17,U22,
	1ANR-G1	1ANR	N/A	11	0.525341	2.87819	643.45	411.698	1170.91	749.182	0.349234	A20,A22,A27,A35,C19,C24,C37,C39,C41,C44,G17,G18,G21,G26,G36,G43,U23,U25,U38,U40,U42,
	1Z31-G1	1Z31	N/A	10	0.556723	0.696733	642.158	377.61	1278.5	751.8	0.398432	A258,A289,A295,C262,C290,C293,C294,C296,C297,G257,G259,G260,G292,U261,U291,
	1P5O-G5	1P5O	N/A	5	0.557525	1.12853	510.291	348.563	865.8	591.4	0.391465	A15,A24,A57,C16,C20,C23,C62,G18,G56,G58,G60,G63,G65,U17,U19,U21,U22,U59,U61,
	2LC8-G2	2LC8	N/A	7	0.5576	2.32552	556.012	362.683	931	607.286	0.416936	A8,C7,G4,G5,G9,U6,A29,A30,A34,A37,A39,A40,C31,C32,C33,C41,C42,C43,G35,G36,U38,
	2KTZ-G2	2KTZ	Ligand	9	0.562321	0.8732	1438.21	740.976	2001.78	1031.33	0.396755	A3,A6,C8,G2,G4,G5,U9,A10,A32,C11,C15,C27,C31,C34,C35,G13,G25,G28,G30,G33,U12,U14,U26,U29,U36,
	2LHP-G1	2LHP	N/A	10	0.564009	1.61704	1123.77	664.982	1797.4	1063.6	0.361503	A6,A7,A8,G5,U4,U9,A12,A15,A27,A28,A29,C23,C24,C26,G10,G11,G13,G14,G20,G21,U22,U25,U30,U31,U32,
	6HAG-G1	6HAG	N/A	5	0.581602	2.61329	1115.02	650.546	1891.2	1103.4	0.379042	A4,A6,C3,C5,G1,U2,A18,A25,A31,A32,A35,C19,C24,G17,G20,G22,G30,U21,U29,U33,U34,
	2LU0-G3	2LU0	N/A	9	0.583688	2.35236	569.914	375.968	1157.78	763.778	0.418777	A12,A13,A17,A18,A23,A26,C11,C14,C25,C28,C31,C34,G15,G19,G21,G27,G32,G33,U20,U24,U29,U35,
Flexibility	1ULL-G1	1ULL	Protein	5	0.600221	1.062	581.059	362.839	991.6	619.2	0.451538	C8,U9,A13,A21,C10,C14,C22,G11,G18,G19,U12,U20,
	2N3O-G1	2N3O	N/A	20	0.601302	0.336	627.013	368.715	1162.4	683.55	0.381895	A4,C5,C6,G1,G2,G3,G8,U7,A17,C15,C16,C21,C22,G18,G19,U14,U20,
	1FYO-G1	1FYO	N/A	22	0.601697	1.245	795.441	547.816	1159.64	798.636	0.254125	A9,C3,C6,C8,G1,G2,G4,G7,U5,A20,A21,C10,C11,C24,G15,G16,G17,G19,G22,U18,U23,
	1P5O-G3	1P5O	N/A	10	0.617116	0.700556	616.155	410.93	1153.2	769.1	0.411516	A24,A28,A54,A57,C20,C23,C25,C27,G26,G56,G58,G60,U21,U22,U53,U55,U59,U61,
	1AQO-G1	1AQO	N/A	8	0.641211	2.05325	692.725	427.925	1252.75	773.875	0.442926	A3,C7,G2,G4,G6,U5,U8,U9,A11,A12,A23,C10,C18,C24,C26,G17,G21,G22,U19,U20,
	2LU0-G1	2LU0	N/A	17	0.670043	1.39613	762.216	479.711	1644.71	1035.12	0.428874	A6,C9,G8,U7,A37,A39,A43,C11,C34,C41,G36,G38,G40,U10,U35,U42,
	2N3Q-G3	2N3Q	N/A	13	0.721572	2.14241	501.917	343.265	1067.85	730.308	0.476599	A6,C5,G4,G7,A32,A33,A44,C37,C43,C45,C58,G34,G36,G42,G57,U35,U59,
	1S9S-G16	1S9S	N/A	3	0.847129	5.81108	739.883	443.893	1344	806.333	0.582485	A305,A353,A354,C355,G276,G277,G309,G310,U306,U308,U375,U376,
	1S9S-G10	1S9S	N/A	3	0.932896	3.69955	781.41	494.229	1436.67	908.667	0.606419	A285,A297,A362,A364,C278,C295,C299,C368,C369,G277,G279,G286,G298,G361,G363,G365,G366,U287,U296,U367,
	1S9S-G2	1S9S	N/A	8	1.25865	4.6528	600.743	397.776	1748.5	1157.75	0.795057	A305,A353,A354,C278,C307,C311,C355,G276,G277,G309,G310,U304,U306,U308,U376,

## Sheet: Large
Class	Pocket group ID	PDB ID	Binding type	Nmunber of pockets	Flexibility score (Q)	RMSF (Å)	Overlapping volume (Å3)	Overlapping surface area (Å2)	Average volune (Å3)	Average surface area (Å2)	S /`P	Overlapping nucleotides
Rigidity	1YSV-G1	1YSV	N/A	13	0.0325027	0.230565	1587	894.642	1683.15	948.846	0.0234881	A4,A5,A7,A8,C6,G1,G2,U3,U9,A10,A16,A17,A25,C26,G12,G19,G22,U11,U18,U20,U21,U23,U24,
	6MCE-G1	6MCE	Protein	10	0.0428734	0.298423	1606.2	901.243	1732.3	972	0.03003	A20,A22,A27,A35,C19,C29,C30,C37,C39,C41,C44,C45,C46,G16,G17,G18,G21,G26,G28,G34,G36,G43,U23,U38,U40,U42,
	6VU1-G1	6VU1	N/A	20	0.0470613	0.4789	2233.25	1264.79	2410.9	1365.4	0.0264448	C5,C7,C9,G1,G2,G3,U4,U6,U8,A18,A49,A50,A53,A54,A58,C14,C48,C55,C56,C57,C59,G12,G15,G19,G47,G51,G52,U10,U11,U13,
	2N6S-G1	2N6S	N/A	10	0.0642753	0.461483	2513.89	1420.76	2736.2	1546.4	0.0338565	A3,A4,A8,G1,G2,U5,U6,U7,U9,A11,A14,A22,A24,A28,A30,A32,C15,C25,G10,G12,G21,G31,U13,U23,U26,U27,U29,U33,U34,
	5LSN-G1	5LSN	N/A	10	0.0896896	0.3638	2172.71	1229.09	2382.9	1348	0.0546374	A80,A81,A84,A87,C64,C65,C67,C82,C83,C85,C86,G68,G70,G71,G73,G74,G77,G89,U66,U69,U72,U75,U76,U88,U90,
	2L2J-G1	2L2J	N/A	20	0.0937997	0.733	3087.84	1711.73	3538.05	1961.3	0.0487529	A4,A5,G1,G2,G6,G7,G9,U3,U8,A15,A16,A26,A31,A35,C18,C19,C22,C28,C29,C30,C32,C33,C36,C37,C38,C41,G10,G11,G13,G14,G23,G24,G25,G40,U12,U17,U20,U27,U34,U39,
	2N4L-G1	2N4L	N/A	10	0.128715	0.820708	4596.06	2354.32	5163.9	2645.2	0.0638878	A3,A4,A6,G1,G2,U5,U7,U8,U9,A17,A24,A26,A30,A31,A33,A35,A39,A43,A47,A49,C13,C18,C22,C42,C52,G12,G15,G29,G34,G36,G40,G41,G44,G45,G46,U10,U11,U14,U16,U19,U23,U25,U32,U37,U38,U48,U50,U51,
	1TXS-G1	1TXS	N/A	20	0.13137	1.0432	2416.27	1183.69	2942.85	1441.65	0.0825736	A6,A9,C4,C8,G7,U5,A17,A25,C10,C12,C21,C26,C27,C34,G14,G15,G22,G23,G31,G33,U11,U13,U16,U18,U19,U24,U28,U29,U30,U32,
	2K5Z-G1	2K5Z	N/A	10	0.141291	0.940043	1555.92	875.859	1850.7	1041.8	0.0954693	A6,A8,C4,C7,G1,G2,U3,U5,U9,A27,C12,C19,C28,G17,G20,G22,G24,G26,U16,U18,U21,U23,U25,
	7DD4-G1	7DD4	N/A	11	0.143943	0.18675	1505.26	903.91	1780.18	1069	0.0921832	G2,G3,U4,A17,A18,A22,A33,C19,C20,C21,C23,C26,G16,G25,G31,G34,G36,U24,U32,U35,
	1Z2J-G1	1Z2J	N/A	20	0.147384	0.458536	2153.53	1109.62	2641.2	1360.9	0.09723	A7,C9,U8,A20,A22,A23,A27,A28,A33,C13,C14,C17,C18,C19,C21,C31,C32,G11,G12,G24,G25,G26,G29,G30,G34,U10,U15,U16,
	6VAR-G1	6VAR	N/A	10	0.158573	0.634444	1577.24	903.433	1833.3	1050.1	0.0906243	A6,C5,G1,G2,G8,U3,U4,U7,U9,A13,A55,A59,C10,C11,C54,G16,G50,G51,G52,G53,G57,G58,U12,U17,U18,U49,U56,
	2KPV-G1	2KPV	N/A	10	0.182283	1.07086	2099.34	1196.54	2565.1	1462	0.10279	A3,A7,G1,G2,G4,G5,G8,U6,U9,A10,A18,A20,A28,C14,C21,C22,C26,C29,C31,G11,G12,G15,G19,G23,U13,U24,U25,U27,U32,
	6MCF-G1	6MCF	Protein	10	0.19063	0.4782	3613.56	1758.39	4245.1	2065.7	0.111477	A27,A34,A39,A43,A52,A65,A77,C29,C33,C35,C36,C37,C38,C45,C47,C48,C62,C67,C80,C85,C86,G24,G25,G26,G31,G46,G49,G60,G61,G69,G70,G73,G74,G78,G79,G81,G82,G83,U28,U30,U32,U40,U44,U63,U66,U68,U72,U76,U84,
	2NBX-G1	2NBX	N/A	10	0.190747	0.46806	7139.21	3863.77	8167.9	4420.5	0.0762518	A687,A688,A691,A697,A699,A700,A704,A709,A714,A719,A724,A741,A743,A750,A752,A760,A765,A781,C694,C695,C696,C705,C706,C707,C708,C721,C726,C732,C733,C735,C740,C742,C751,C763,C776,C779,G686,G689,G690,G693,G698,G701,G702,G712,G716,G717,G718,G723,G728,G729,G730,G731,G736,G737,G739,G745,G754,G756,G761,G764,G766,G767,G777,U692,U703,U710,U711,U713,U715,U720,U722,U725,U727,U734,U738,U744,U753,U755,U757,U758…
	2L3J-G1	2L3J	N/A	19	0.203464	0.81575	6297.19	3208.05	7525.3	3833.7	0.0774078	A240,A243,A244,A254,A255,A257,A260,A262,A263,A265,A266,A268,A273,A274,A275,A283,A285,A288,A293,A297,A303,C239,C264,C290,C291,C292,C294,C295,C298,C299,C300,C306,G237,G238,G245,G246,G248,G249,G250,G252,G253,G258,G270,G277,G280,G286,G302,G305,U241,U242,U247,U251,U256,U259,U261,U267,U269,U276,U278,U279,U281,U282,U284,U287,U289,U296,U301,U304,
	2N8V-G1	2N8V	N/A	10	0.211722	0.630022	3902.2	2079.35	4702.5	2505.8	0.107564	A3,A4,A6,C5,C8,G1,G2,G7,U9,A12,A19,A23,A25,A28,A34,A42,A44,C13,C18,C24,C27,C31,C43,C47,C50,C54,G10,G17,G20,G26,G29,G32,G46,G48,G49,G51,U11,U14,U21,U22,U30,U33,U45,U52,U53,
	2L2K-G1	2L2K	N/A	20	0.216268	0.546481	2144.82	1232.89	2752.85	1582.4	0.119983	G1,G2,U3,A4,A5,G6,G7,U8,G9,G10,G11,U12,G13,G14,C29,C30,A31,C32,C33,U34,A35,C36,C37,C38,U39,G40,C41,
	6XB7-G1	6XB7	N/A	10	0.220858	0.936	1502.82	813.697	1998.9	1082.3	0.143866	A12,A21,A26,A30,A32,C11,C20,C25,C29,C33,C34,G10,G13,G14,G16,G18,G19,G27,U15,U17,U28,U31,
	2L94-G2	2L94	Ligand	10	0.222825	0.595103	1829.24	1003.87	2189.9	1201.8	0.140338	A7,C9,G6,U8,A20,A22,A23,A27,A28,A33,C13,C14,C17,C18,C19,C31,C32,G11,G12,G24,G25,G26,G29,G30,G34,G35,U10,U15,U16,
	1MNX-G1	1MNX	N/A	13	0.238843	1.08796	1556.84	887.807	2035.23	1160.62	0.162462	A76,A78,A83,A98,A99,C74,C79,C86,C91,C92,C95,G75,G81,G84,G85,G87,G90,G94,G96,G97,U77,U80,U82,U93,
	6NOA-G1	6NOA	N/A	10	0.238923	1.27085	3852.55	1948.61	5052.6	2555.6	0.129498	A96,A99,C95,G93,G94,G97,U98,A101,A107,A108,A113,A114,A115,A131,A142,A143,C104,C105,C109,C112,C125,C130,C132,C133,C136,C138,C140,C144,C147,C148,G102,G106,G111,G146,U100,U103,U110,U126,U127,U128,U129,U134,U135,U137,U139,U141,U145,
Intermediate flexibility	2MXL-G1	2MXL	N/A	20	0.308602	1.93762	2634.31	1281.83	3749.35	1824.4	0.192578	A3,A9,C8,G2,G7,U4,U5,U6,A15,A18,A26,A31,A36,A38,C12,C13,C16,C17,C23,C35,G10,G11,G24,G25,G28,G29,G30,G32,G34,G37,U14,U27,U33,U39,
	2JWV-G1	2JWV	N/A	10	0.319751	0.893	1866.2	990.38	2329.6	1236.3	0.223953	A2,A4,A9,C5,G1,G8,U3,U6,U7,A10,A11,A17,A27,C12,C24,G14,G18,G19,G22,G23,G25,U13,U20,U21,U26,U28,
	7K4L-G1	7K4L	N/A	10	0.321796	1.81215	1954.81	1062.48	2718.4	1477.5	0.191619	A3,G4,G6,G7,U5,U8,U9,A10,A15,A23,A27,A33,A34,C13,C16,C21,C24,C31,C35,C36,G11,G17,G22,G25,G28,U12,U14,U18,U19,U26,U29,U30,U32,
	6U79-G1	6U79	N/A	10	0.327817	0.649741	1651.46	983.043	2163.1	1287.6	0.192986	A9,C6,G1,G2,U3,U4,U5,U7,U8,A12,A24,A30,A31,A33,A34,A35,C11,C13,C22,C28,G10,G23,G26,G32,U25,U27,U29,
	2N7M-G1	2N7M	N/A	10	0.397796	2.09309	3749.24	1875.44	5232.3	2617.3	0.214088	C9,A10,A15,A16,A17,A19,A23,A25,A28,A44,A46,A73,C11,C20,C22,C27,C58,C77,C78,C79,G12,G13,G14,G21,G29,G31,G45,G49,G51,G57,G74,U18,U26,U30,U47,U48,U50,U52,U53,U54,U55,U56,U75,U76,
	2PCV-G1	2PCV	N/A	8	0.420088	2.31994	1752.86	855.642	2724.38	1329.88	0.271488	A3,C4,C5,C6,C8,C9,G1,G2,G7,A28,C26,C27,G29,G31,G32,U30,U33,
	6W3M-G1	6W3M	N/A	10	0.450098	1.1825	1708.42	979.263	2453.6	1406.4	0.263814	G6,U4,U5,U7,U8,U9,A11,A12,A14,A16,A18,A23,A31,A32,A33,A34,A35,C25,C27,G10,G15,G17,G22,G29,G30,U13,U24,U26,U28,U36,
	2LWK-G2	2LWK	Ligand	3	0.50688	0.645577	1668.98	895.477	2349	1260.33	0.323998	A2,A5,A7,A8,A9,G1,G3,G6,U4,A11,A12,C10,C21,C22,C25,C31,G13,G14,G20,G24,G30,U23,U26,U27,U28,U29,
	7LVA-G3	7LVA	N/A	7	0.518744	0.883762	2080.11	1156.95	3041.57	1691.71	0.306904	A140,A147,A149,A157,A161,C142,C143,C144,C146,C150,C160,G148,G158,G162,G164,G166,U141,U145,U159,U163,U165,
Flexibility	2LKR-G2	2LKR	N/A	11	0.768712	2.16132	1995.36	1115.8	3218.91	1800	0.42894	A42,A43,A51,A53,A54,A55,A57,A59,A70,A71,C26,C27,C44,C45,C52,C63,C73,C75,G23,G56,G58,G67,G68,G69,G86,G87,U24,U25,U48,U49,U50,U60,U61,U62,U72,U74,U76,U82,U83,U84,U85,
	7LVA-G4	7LVA	N/A	3	0.788148	1.10446	1510.72	831.83	2341	1289	0.490303	A177,A180,A198,A205,A209,A210,A211,C179,C185,C187,C188,C199,C207,G178,G181,G183,G184,G186,G195,G196,G197,G206,G208,G212,U182,U213,
	7LVA-G1	7LVA	N/A	8	0.824405	1.94663	4153.09	2147.52	7244.62	3746.12	0.386139	A132,A133,A136,A138,A140,A168,A169,A170,A171,A177,A180,A198,A209,A210,A211,A214,A215,A216,C134,C142,C173,C175,C179,C185,C187,C188,C189,C199,C207,G137,G139,G166,G167,G178,G181,G183,G184,G186,G195,G196,G197,G206,G208,G212,U131,U135,U141,U172,U174,U176,U182,U213,
	1N8X-G1	1N8X	N/A	21	1.18628	1.02127	1780.51	1002.97	2378.38	1339.76	0.236106	A3,C4,C6,C9,G1,G2,G7,G8,U5,A24,A25,A27,A32,C13,C20,C23,C30,C35,G12,G21,G22,G26,G28,G29,G31,G33,U10,U11,U14,U34,
