# Supplementary material for: RPflex: A Coarse-Grained Network Model for RNA Pocket Flexibility Study
Source: Int J Mol Sci. 2023 Mar 13;24(6):5497. doi: 10.3390/ijms24065497 (PMC10058308; doi:10.3390/ijms24065497)
Supplement: Supplementary file 1 [file ijms-24-05497-s001.zip › Supplementary Data S4.xlsx]

## Sheet: Flexibility
Pocket group ID	Overlapping nucleotides	Stem	Hairpin loop	Internal loop	Bulge	Multi-branched loop	Single-stranded
1A60-G1	13	9	4
1ANR-G2	14	8	4		2
1AUD-G4	14	8	3	1			2
1BVJ-G2	18	13		5
1D6K-G1	12	9		2			1
1FYO-G1	21	15	1	5
1JTJ-G1	14	10	4
1LDZ-G1	15	10	2	3
1M5L-G2	9	7		2
1P5O-G3	18	11		7
1R2P-G2	10	10
1S9S-G16	12	5					7
1S9S-G2	15	7					8
1TJZ-G3	12	9		3
1Z31-G2	13	8	1	3	1
2LKR-G7	8	5		2		1
2LKR-G9	11	7	1			3
2LU0-G1	16	12		4
2LU0-G7	11	8			3
2LUN-G2	12	7		5
2MIY-G1	12	6					6
2N3Q-G3	12	3		9
2N3Q-G4	17	11	4		2
2N3Q-G5	9	5	3		1
2N82-G1	13	5	4	4
2N82-G4	12	8		4
2N8V-G2	15	6					9
6NOA-G2	13	3	9		1
7LVA-G1	52	30	5	4		13
7LVA-G4	26	13	5			8
Total	449	268	50	63	10	25	33

## Sheet: Rigidity
Pocket group ID	Overlapping nucleotides	Stem	Hairpin loop	Internal loop	Bulge	Multi-branched loop	Single-stranded
1BGZ-G1	10	8			2
1Q8N-G1	11	10		1
1S9S-G1	14	10			4
1YSV-G1	23	21	2
2FY1-G1	17	15	2
2K5Z-G1	23	20	1	1	1
2KPV-G1	29	22	2	5
2KX8-G2	17	14	2		1
2LBS-G2	17	17
2LC8-G5	19	15		1		2	1
2LK3-G2	10	10
2M24-G2	14	14
2MQT-G3	15	11		4
2N4L-G1	48	40	3	4	1
2N6S-G1	29	28			1
2NC1-G1	12	11		1
2NC1-G2	20	19	1
2NC1-G3	12	11	1
2NC1-G4	14	10		3		1
2NCI-G1	10	10
5A18-G1	13	13
5IEM-G1	21	18		3
5IEM-G3	13	10			3
5KH8-G2	15	7	5				3
5KMZ-G1	13	4	3	1			5
5KQE-G2	13	13
5LSN-G1	25	22	1	2
6VAR-G1	27	24			3
6W3M-G2	13	13
7DD4-G1	20	20
Total	537	460	23	26	16	3	9
