# Supplementary material for: RPflex: A Coarse-Grained Network Model for RNA Pocket Flexibility Study
Source: Int J Mol Sci. 2023 Mar 13;24(6):5497. doi: 10.3390/ijms24065497 (PMC10058308; doi:10.3390/ijms24065497)
Supplement: Supplementary file 1 [file ijms-24-05497-s001.zip › Supplementary Data S5.xlsx]

## Sheet: Rigidity
Pocket group ID	Number of pockets	RMSF (Å)	Q	d<k>	d<C>	ddmax	d<d>	Q*d<k>	Q*d<C>	Q*ddmax	Q*d<d>
2NC1-G1	6	0.078	0.103618	0.0357125	0.0500825	0	0.0642824	0.00370046	0.00518946	0	0.00666083
6W3M-G2	6	0.156692	0.107239	0.567303	0.0264245	0.372678	0.0590833	0.0608372	0.00283374	0.0399658	0.00633607
5KMZ-G1	10	0.212308	0.0745812	0.157458	0.0236803	0.3	0.0396986	0.0117434	0.0017661	0.0223744	0.00296077
2NC1-G4	5	0.219286	0.0606309	0.209818	0.0295684	0	0.0242496	0.0127215	0.00179276	0	0.00147027
2QH2-G2	4	0.2735	0.169205	0.1671	0.0219163	0	0.0254866	0.0282742	0.00370835	0	0.00431246
1Q8N-G1	20	0.287545	0.0851901	0.334011	0.0359599	0.217945	0.0360999	0.0284544	0.00306343	0.0185667	0.00307535
6MCE-G1	10	0.298423	0.0428734	0.104166	0.0101627	0.3	0.0321322	0.00446596	0.000435708	0.012862	0.00137762
6HYK-G1	10	0.306545	0.120254	0.2193	0.0319104	0.3	0.0520516	0.0263716	0.00383735	0.0360762	0.00625941
2NC1-G2	10	0.3164	0.17068	0.58972	0.0354134	0.489898	0.175637	0.100653	0.00604437	0.0836159	0.0299777
6MCF-G2	4	0.346714	0.0803702	0.3576	0.0365276	0.433013	0.0745734	0.0287404	0.00293573	0.0348013	0.00599348
6GZK-G1	10	0.359312	0.139035	0.277589	0.0308013	0.663325	0.171018	0.0385947	0.00428246	0.0922256	0.0237776
2L2K-G2	9	0.38375	0.284126	0.114421	0.0222863	0.566558	0.0980591	0.03251	0.00633213	0.160974	0.0278612
2FY1-G1	17	0.385941	0.0975543	0.163345	0.0193435	0	0.0538868	0.0159351	0.00188704	0	0.00525689
1K5I-G1	10	0.394	0.0898498	0.16128	0.0232112	0.663325	0.118821	0.014491	0.00208552	0.0595996	0.010676
2KX8-G1	10	0.404217	0.0949407	0.288964	0.0163809	0.538516	0.139667	0.0274344	0.00155521	0.0511271	0.0132601
2KXM-G1	10	0.413231	0.154019	0.43343	0.0535361	0.4	0.0760917	0.0667564	0.00824558	0.0616076	0.0117196
2KX8-G2	10	0.414294	0.0892556	0.156327	0.0317953	0.458258	0.0971004	0.013953	0.00283791	0.040902	0.00866675
1A4T-G1	20	0.415583	0.0985135	0.190137	0.0257268	0.217945	0.0418643	0.0187311	0.00253443	0.0214705	0.0041242
2LBS-G2	14	0.418588	0.204943	0.384	0.0359656	0.451754	0.0516483	0.0786981	0.00737089	0.0925838	0.0105849
2LBS-G1	16	0.450182	0.235783	0.907682	0.0726334	0.353553	0.131192	0.214016	0.0171257	0.0833617	0.0309327
1HWQ-G2	3	0.453556	0.223838	0.711805	0.0884756	0.816497	0.163372	0.159329	0.0198042	0.182763	0.0365688
1T4L-G2	9	0.4539	0.135162	0.526232	0.0842143	0.566558	0.102074	0.0711268	0.0113826	0.0765773	0.0137966
6MCF-G1	10	0.4782	0.19063	0.33888	0.0370261	0.830662	0.238269	0.0646006	0.00705829	0.158349	0.0454213
2GIO-G1	20	0.543926	0.190497	0.132934	0.0145287	0.829156	0.168784	0.0253235	0.00276768	0.157952	0.032153
2L1V-G1	20	0.5584	0.102161	0.218657	0.0396939	0.384057	0.0681166	0.0223383	0.00405518	0.0392359	0.00695889
2HNS-G2	8	0.560083	0.276784	0.558611	0.0724148	0.330719	0.117749	0.154615	0.0200433	0.0915376	0.0325911
2L94-G2	10	0.595103	0.222825	0.152252	0.014539	0.5	0.14078	0.0339257	0.00323966	0.111413	0.0313693
1T4L-G1	15	0.600062	0.158698	0.506106	0.0219757	0.339935	0.0767851	0.0803178	0.00348749	0.0539468	0.0121856
2N8V-G1	10	0.630022	0.211722	0.223974	0.025069	1.41774	0.333472	0.0474203	0.00530767	0.300168	0.0706035
7LVA-G2	8	0.7081	0.266734	0.1945	0.020265	0.829156	0.226945	0.0518798	0.00540537	0.221164	0.060534

## Sheet: Flexibility
Pocket group ID	Number of pockets	RMSF (Å)	Q	d<k>	d<C>	ddmax	d<d>	Q*d<k>	Q*d<C>	Q*ddmax	Q*d<d>
2N3O-G1	20	0.336	0.601302	0.193514	0.0276422	0.217945	0.0330985	0.116361	0.0166213	0.131051	0.0199022
2QH2-G1	18	0.415667	0.785743	0.510734	0.0311293	0.881917	0.185564	0.401305	0.0244596	0.69296	0.145806
2MTK-G3	3	0.648	0.597784	0.399998	0.0474972	0.471405	0.208869	0.239113	0.0283931	0.281798	0.124859
1BVJ-G2	3	0.649727	0.7618	0.410961	0.0252886	0.471405	0.125708	0.31307	0.0192648	0.359116	0.0957644
1P5O-G3	10	0.700556	0.617116	0.758385	0.0260214	1.36015	0.403751	0.468012	0.0160582	0.839369	0.249162
2N3Q-G2	4	0.798083	0.677657	0.364864	0.0148775	0.433013	0.117612	0.247253	0.0100819	0.293434	0.0797009
1P5M-G4	3	0.843	0.845227	0.661773	0.0313057	0.816497	0.201404	0.559349	0.0264605	0.690125	0.170232
1R2P-G2	3	0.9106	0.803104	0.318605	0.0434649	0.471405	0.0935442	0.255873	0.0349068	0.378587	0.0751257
2LU0-G7	3	0.938364	0.653448	1.05529	0.0928882	0.471405	0.187083	0.689578	0.0606976	0.308038	0.122249
1LDZ-G2	8	0.959714	0.752744	0.895346	0.0599665	0.330719	0.147696	0.673966	0.0451394	0.248947	0.111177
2LUN-G2	3	0.969667	0.81861	0.843645	0.0110923	0.816497	0.168545	0.690616	0.00908025	0.668392	0.137973
1LDZ-G1	18	1.0494	0.630114	0.8756	0.0577166	0.816497	0.195969	0.551728	0.036368	0.514486	0.123482
2LKR-G9	4	1.08991	0.817962	1.20188	0.153866	0.433013	0.122424	0.983095	0.125857	0.354188	0.100138
7LVA-G4	3	1.10446	0.788148	0.193512	0.0108087	0.471405	0.134234	0.152516	0.00851884	0.371537	0.105796
6SDW-G2	7	1.1454	0.822713	0.775776	0.0760189	0.728431	0.157656	0.638241	0.0625417	0.59929	0.129706
1D6K-G1	8	1.15283	0.767261	0.491374	0.0872807	0.433013	0.101208	0.377012	0.0669671	0.332234	0.077653
1FYO-G1	22	1.245	0.601697	0.411647	0.022391	0.756514	0.189147	0.247687	0.0134726	0.455193	0.113809
6NOA-G2	3	1.24831	0.651467	0.28105	0.104768	0.471405	0.233362	0.183095	0.0682529	0.307104	0.152028
1A60-G1	17	1.37715	0.671539	0.655346	0.0757021	0.680932	0.138859	0.440091	0.0508369	0.457272	0.0932493
2LU0-G1	17	1.39613	0.670043	0.706562	0.0515021	1.19399	0.352755	0.473427	0.0345086	0.800023	0.236361
1TOB-G3	3	1.46807	0.707066	0.498207	0.048975	0.471405	0.129466	0.352266	0.0346286	0.333314	0.0915407
2MIY-G1	11	1.51525	0.840126	1.0357	0.0858545	0.57496	0.143502	0.870122	0.0721287	0.483039	0.12056
1ANR-G2	3	1.52907	0.694867	0.321767	0.0625262	0.471405	0.145071	0.223585	0.0434474	0.327563	0.100805
1NYB-G1	10	1.70856	0.745686	0.610772	0.042028	0.781025	0.19568	0.455444	0.0313397	0.582399	0.145916
2N82-G1	18	1.83846	0.840786	1.06937	0.112617	0.831479	0.243409	0.899109	0.0946868	0.699097	0.204655
7LVA-G1	8	1.94663	0.824405	0.26998	0.0181598	2.17945	0.743051	0.222573	0.014971	1.79675	0.612575
1AQO-G1	8	2.05325	0.641211	1.08546	0.0716443	0.992157	0.232917	0.696009	0.0459391	0.636182	0.149349
2N3Q-G3	13	2.14241	0.721572	0.657927	0.081928	0.532939	0.137241	0.474742	0.059117	0.384554	0.0990291
1S9S-G10	3	3.69955	0.932896	1.22484	0.0573166	1.24722	0.301605	1.14265	0.0534704	1.16353	0.281366
1S9S-G16	3	5.81108	0.847129	0.659966	0.0677567	2.16025	0.665856	0.559076	0.0573986	1.83001	0.564066
